# Supplementary material for: DNA Base Excision Repair Intermediates Influence Duplex–Quadruplex Equilibrium
Source: MDPI journal article supplement (doi:10.3390/molecules28030970), 2023-01-18

## **Supplementary Appendix**

### **Table of Contents**

|                                                                 |       |
|-----------------------------------------------------------------|-------|
| A. Oligonucleotides synthesized and methods                     | 2-3   |
| B. MALDI-MS+ results for oligonucleotides and methods           | 4-5   |
| C. MALDI-MS+ spectra of oligonucleotides                        | 6-18  |
| D. HPLC results for nucleoside standards and methods            | 19    |
| E. UV spectra from HPLC PDA for nucleoside standards            | 20-21 |
| F. Enzyme digestion results for oligonucleotides and methods    | 22    |
| G. HPLC and UV spectra for enzyme digestion of oligonucleotides | 23-35 |
| H. GC/MS results for oligonucleotides and methods               | 36    |
| I. GC/MS spectra of hydrolyzed and derivatized oligonucleotides | 37-49 |

## A. Oligonucleotides synthesized and methods

**Table 1: Synthesis of Oligonucleotides**

|    | Oligonucleotide          | Sequence                                           | Lot    | Synthesis Conditions | Purification & Detritylation |
|----|--------------------------|----------------------------------------------------|--------|----------------------|------------------------------|
| 1  | Quad-22mer-T             | 5'-AGGGTTAGGGT <b>T</b> AGGGTTAGGG-3'              | L-981  | Standard A           | Standard A                   |
| 2  | Quad-22mer-U             | 5'-AGGGTTAGGGT <b>U</b> AGGGTTAGGG-3'              | L-9123 | Standard C           | Standard A                   |
| 3  | Quad-22mer-5FU           | 5'-AGGGTTAGGGT <b>5FU</b> AGGGTTAGGG-3'            | L-9143 | Standard C           | Standard A                   |
| 4  | Quad-22mer-5hmU          | 5'-AGGGTTAGGGT <b>5hmU</b> AGGGTTAGGG-3'           | L-1051 | Standard D           | Standard A                   |
| 5  | Quad-22mer-THF           | 5'-AGGGTTAGGGT <b>THF</b> AGGGTTAGGG-3'            | L-1026 | Standard A           | Standard A                   |
| 6  | Quad-22mer-T-FAM         | 5'-6FAM-AGGGTTAGGGT <b>T</b> AGGGTTAGGG-3'         | L-999  | Standard A           | Standard A                   |
| 7  | Quad-22mer-U-FAM         | 5'-6FAM-AGGGTTAGGGT <b>U</b> AGGGTTAGGG-3'         | L-9113 | Standard C           | Standard A                   |
| 8  | Quad-22mer-5FU-FAM       | 5'-6FAM-AGGGTTAGGGT <b>5FU</b> AGGGTTAGGG-3'       | L-1011 | Standard C           | Standard A                   |
| 9  | Quad-22mer-5hmU-FAM      | 5'-6FAM-AGGGTTAGGGT <b>5hmU</b> AGGGTTAGGG-3'      | L-1041 | Standard D           | Standard A                   |
| 10 | Quad-22mer-THF-FAM       | 5'-6FAM-AGGGTTAGGGT <b>THF</b> AGGGTTAGGG-3'       | L-1006 | Standard C           | Standard A                   |
| 11 | Quad-22mer-T-FAM-BHQ1    | 5'-6FAM-AGGGTTAGGGT <b>T</b> AGGGTTAGGG-BHQ1-3'    | L-9102 | Standard A           | Standard A                   |
| 12 | Quad-22mer-U-FAM-BHQ1    | 5'-6FAM-AGGGTTAGGGT <b>U</b> AGGGTTAGGG-BHQ1-3'    | L-9118 | Standard C           | Standard A                   |
| 13 | Quad-22mer-5FU-FAM-BHQ1  | 5'-6FAM-AGGGTTAGGGT <b>5FU</b> AGGGTTAGGG-BHQ1-3'  | L-1016 | Standard C           | Standard A                   |
| 14 | Quad-22mer-5hmU-FAM-BHQ1 | 5'-6FAM-AGGGTTAGGGT <b>5hmU</b> AGGGTTAGGG-BHQ1-3' | L-1046 | Standard D           | Standard A                   |
| 15 | Quad-22mer-THF-FAM-BHQ1  | 5'-6FAM-AGGGTTAGGGT <b>THF</b> AGGGTTAGGG-BHQ1-3'  | L-1021 | Standard C           | Standard A                   |
| 16 | Quad-11mer-FAM           | 5'-6FAM-AGGGTTAGGGT-3'                             | L-9105 | Standard A           | Standard A                   |
| 17 | Quad-10mer-BHQ1-phos     | 5'-pAGGGTTAGGG-BHQ1-3'                             | L-1079 | Standard A           | Standard B                   |
| 18 | Quad-22mer-T-Comp        | 3'-TCCCAATCCCAATCCCAATCCC-5'                       | L-984  | Standard A           | Standard A                   |
| 19 | Quad-22mer-U-Comp        | 3'-TCCCAATCCCAAUCCCAATCCC-5'                       | L-9128 | Standard A           | Standard A                   |
| 20 | Quad-22mer-THF-Comp      | 3'-TCCCAATCCCAAT <b>THF</b> CCCAATCCC-5'           | L-1031 | Standard A           | Standard A                   |
| 21 | Quad-12mer-phos          | 3'-TCCCAATCCCAAp-5'                                | L-1082 | Standard A           | Standard B                   |
| 22 | Quad-9mer                | 3'-CCCAATCCC-5'                                    | L-987  | Standard A           | Standard A                   |
| 23 | Quad-22mer-U-Comp-Cy5    | 3'-TCCCAATCCCAAUCCCAATCCC-Cy5-5'                   | L-1131 | Standard C           | Standard A                   |
| 24 | 22mer-nonquad_5hmU       | 5'-6FAM-ACAGTTAGGGT <b>5hmU</b> AGGGTTACAC-3'      | L-1154 | Standard B           | Standard A                   |
| 25 | 22mer-nonquad_U          | 5'-6FAM-ACAGTTAGGGT <b>U</b> AGGGTTACAC-3'         | L-1121 | Standard A           | Standard A                   |
| 26 | 22mer-nonquad_compa      | 5'-GTGTAACCC <b>T</b> AACCTACTGT-3'                | L-1141 | Standard A           | Standard A                   |

All oligonucleotides were synthesized on an Expedite 8909 DNA synthesizer.

**Standard A:** Oligonucleotides were synthesized using standard phosphoramidites (Bz-dA, Bz-dC, iBu-dG, dT) and appropriate modified phosphoramidite. The oligonucleotides were deprotected in ammonium hydroxide at 55°C for 15-17 hours.

**Standard B:** Oligonucleotides were synthesized using standard phosphoramidites (Bz-dA, iBu-dG, dT), Ac-dC and appropriate modified phosphoramidite. The oligonucleotides were deprotected in ammonium hydroxide at 55°C for 15-17 hours.

**Standard C:** Oligonucleotides were synthesized using standard phosphoramidites (Bz-dA, Bz-dC, iBu-dG, dT) and appropriate modified phosphoramidite. The oligonucleotides were deprotected in ammonium hydroxide at room temperature for 40-90 hours.

**Standard D:** Oligonucleotides were synthesized using standard phosphoramidites (Bz-dA, iBu-dG, dT), Ac-dC and appropriate modified phosphoramidite. The oligonucleotides were deprotected in ammonium hydroxide at 55°C for 39-64 hours.

**Ultramild A:** Oligonucleotides were synthesized using ultramild phosphoramidites (Pac-dA, Ac-dC, iPr-Pac-dG, dT) and appropriate modified phosphoramidite. The oligonucleotides were deprotected in ammonium hydroxide at room temperature for 15 hours.

**Standard A purification and detritylation by C18 Sep-pak:** C18 Sep-pak cartridge (Waters WAT020515) was prepared by washing with acetonitrile (5 mL) and 1 M triethylammonium acetate (10 mL). The crude DMT-on oligonucleotide was loaded onto the cartridge in 1 M triethylammonium acetate (2 mL) then failure sequences were eluted with 10% ammonium hydroxide (5 mL) and water (5 mL). Detritylation was done with 2% trifluoroacetic acid (5 mL) and the cartridge washed with water (5 mL). The DMT-off oligonucleotide was then eluted with acetonitrile in water (2 mL of 20% ACN, 4 mL of 50% ACN).

**Standard B purification and detritylation by C18 Sep-pak:** C18 Sep-pak cartridge (Waters WAT020515) was prepared by washing with acetonitrile (5 mL) and 1 M triethylammonium acetate (10 mL). The crude DMT-on oligonucleotide was loaded onto the cartridge in 1 M triethylammonium acetate (2 mL) then failure sequences were eluted with 10% ammonium hydroxide (5 mL) and water (5 mL). Detritylation was done with 2% trifluoroacetic acid (5 mL) and the cartridge washed with water (5 mL). The DMT-off oligonucleotide was then eluted with acetonitrile in water (2 mL of 20% ACN, 4 mL of 50% ACN). The 5'-phosphate group was deprotected in ammonium hydroxide at room temperature for 15 hours.

## B. MALDI-MS+ results for oligonucleotides and methods

**Table 2: Maldi-MS of Oligonucleotides**

|    | Oligonucleotide          | Maldi-MS+      |                |          |                                     |
|----|--------------------------|----------------|----------------|----------|-------------------------------------|
|    |                          | Expected (M+H) | Observed (M+H) | $\Delta$ | Data File (D:\Data\Linda)           |
| 1  | Quad-22mer-T             | 6967.31        | 6968.6         | +1.29    | \03222022\L-981\0_A14\1\1SRef       |
| 2  | Quad-22mer-U             | 6953.29        | 6950.78        | -2.51    | \03222022\L-9123\0_C1\1SRef         |
| 3  | Quad-22mer-5FU           | 6971.28        | 6971.17        | -0.11    | \03252022\L-9143\0_H3\1\1SRef       |
| 4  | Quad-22mer-5hmU          | 6983.31        | 6985.23        | +1.92    | \03252022\L-1051\0_G5\1\1SRef       |
| 5  | Quad-22mer-THF           | 6843.22        | 6841.93        | -1.29    | \03222022\L-1026\0_C12\1\1SRef      |
| 6  | Quad-22mer-T-FAM         | 7534.79        | 7535.22        | +0.43    | \03222022\L-999\0_B19\1\1SRef       |
| 7  | Quad-22mer-U-FAM         | 7520.77        | 7521.43        | +0.66    | \03222022\L-9113\0_B23\1\1SRef      |
| 8  | Quad-22mer-5FU-FAM       | 7538.76        | 7536.48        | -2.28    | \03222022\L-1011\0_D9\1\1SRef       |
| 9  | Quad-22mer-5hmU-FAM      | 7550.79        | 7548.2         | -2.59    | \03222022\L-1041\0_D15\1\1SRef      |
| 10 | Quad-22mer-THF-FAM       | 7410.7         | 7409.64        | -1.06    | \03222022\L-1006\0_D8\1\1SRef       |
| 11 | Quad-22mer-T-FAM-BHQ1    | 8089.29        | 8087.99        | -1.3     | \03222022\L-9102\0_A20\1\1SRef      |
| 12 | Quad-22mer-U-FAM-BHQ1    | 8075.26        | 8074.47        | -0.79    | \03252022\L-9118\0_G2\1\1SRef       |
| 13 | Quad-22mer-5FU-FAM-BHQ1  | 8093.25        | 8094.45        | +1.2     | \03252022\L-1016\0_D10\1\1SRef      |
| 14 | Quad-22mer-5hmU-FAM-BHQ1 | 8105.29        | 8103.98        | -1.31    | \03222022\L-1046\0_C16\1\1SRef      |
| 15 | Quad-22mer-THF-FAM-BHQ1  | 7965.19        | 7965.8         | +0.61    | \03222022\L-1021\0_C11\1\1SRef      |
| 16 | Quad-11mer-FAM           | 4020.66        | 4020.01        | -0.65    | \03222022\L-9105\0_B21\1\1SRef      |
| 17 | Quad-10mer-BHQ1-phos     | 3783.48        | 3784.43        | +0.95    | \03252022\L-1079_15hr\0_G8\1\1SRef  |
| 18 | Quad-22mer-T-Comp        | 6505.05        | 6504.11        | -0.94    | \03222022\L-984\0_A15\1\1SRef       |
| 19 | Quad-22mer-U-Comp        | 6491.03        | 6470.6         | -20.43   | \03222022\L-9128\0_C2\1\1SRef       |
| 20 | Quad-22mer-THF-Comp      | 6380.96        | 6378.75        | -2.21    | \03222022\L-1031\0_C13\1\1SRef      |
| 21 | Quad-12mer-phos          | 3616.24        | 3614.58        | -1.66    | \03252022\L-1082_15hr\0_H10\1\1SRef |
| 22 | Quad-9mer                | 2604.66        | 2614.21        | +9.55    | \03222022\L-987\0_A16\1\1SRef       |
| 23 | Quad-22mer-U-Comp-Cy5    | 7024.64        | 7023.71        | -0.93    | \04252022\L-1131\0_I6\1\1SRef       |
| 24 | 22mer-nonquad_5hmU       | 7398.72        | 7394.64        | -4.08    | \04252022\L-1154\0_J9\1\1SRef       |
| 25 | 22mer-nonquad_U          | 7368.7         | 7364.77        | -3.93    | \04252022\L-1121\0_I4\1\1SRef       |
| 26 | 22mer-nonquad_compa      | 6655.15        | 6652.14        | -3.01    | \04252022\L-1141\0_I3\1\1SRef       |

**Desalting of C18 Sep-pak purified oligonucleotides:** Micro BioSpin P6 column (BioRad 732-6221) was prepared by centrifugation at 1000G for 2 minutes. Water (500  $\mu$ L) was added and the column washed by centrifugation at 1000G for 1 minute then a second wash was done. 1 OD of purified oligonucleotide in water (100  $\mu$ L) was loaded and eluted into a new collection tube by centrifugation at 1000G for 4 minutes. The water was evaporated under reduced pressure and the oligo resuspended in water (25  $\mu$ L).

**Maldi Sample Preparation:** 0.4 OD of HPLC purified or P6 BioSpin column desalted oligo in water (10  $\mu$ L) was mixed with desalting ion exchange resin (2  $\mu$ L) for 1 hour.

**Desalting Ion Exchange Resin:** Prepare slurry of cation exchange resin (6 g) in 50 / 50 acetonitrile / water (5 mL), pour into column and let settle (gravity). Wash resin with 50 / 50 acetonitrile / water (3-4 column volumes), 5% ammonium hydroxide (2 x 10 mL), 2 M ammonium acetate (3 x 10 mL) and water (3-4 column volumes). Aliquot into 1 mL fractions (50% suspension) and store -20°C.

**Matrix:** 3-hydroxypicolinic acid (70 mg) and ammonium citrate (10 mg) in 50/50 acetonitrile / water (1 mL) with 0.1% trifluoroacetic acid

The Maldi plate was spotted with HPA matrix (1  $\mu$ L) and allowed to dry. The sample (1 $\mu$ L) was spotted on top of the matrix and allowed to dry before running on Bruker Autoflex Maldi-MS in positive mode.

Expected (M+H) values were calculated using average molecular weights.

### C. MALDI-MS+ spectra of oligonucleotides

Quad-22mer-T

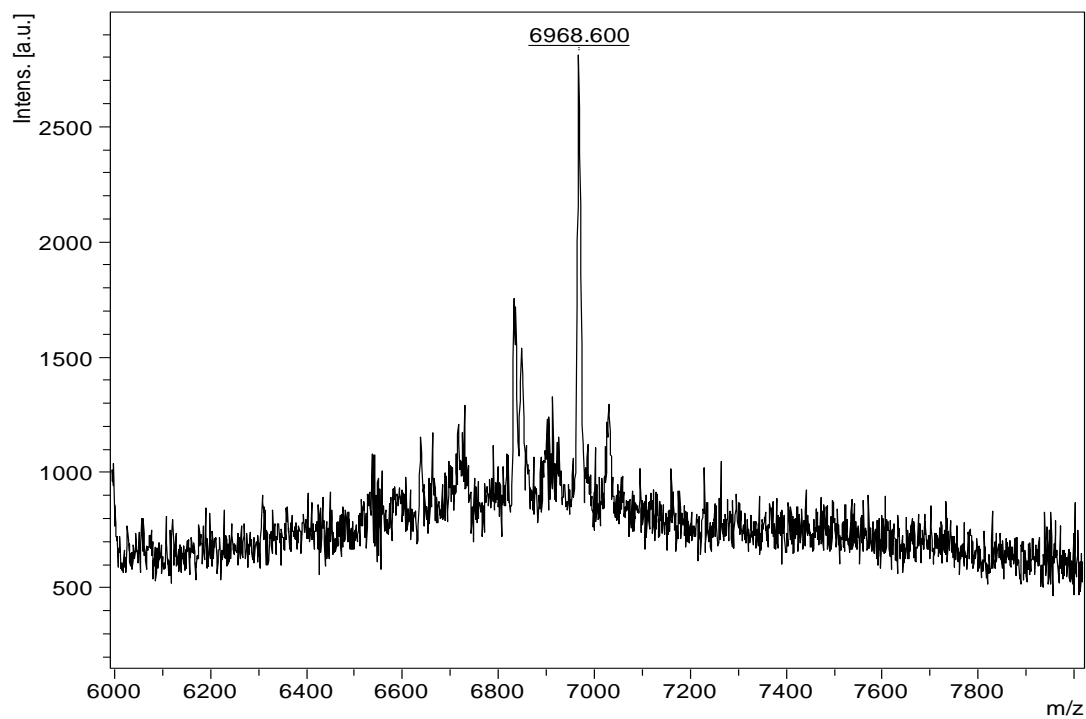

Quad-22mer-U

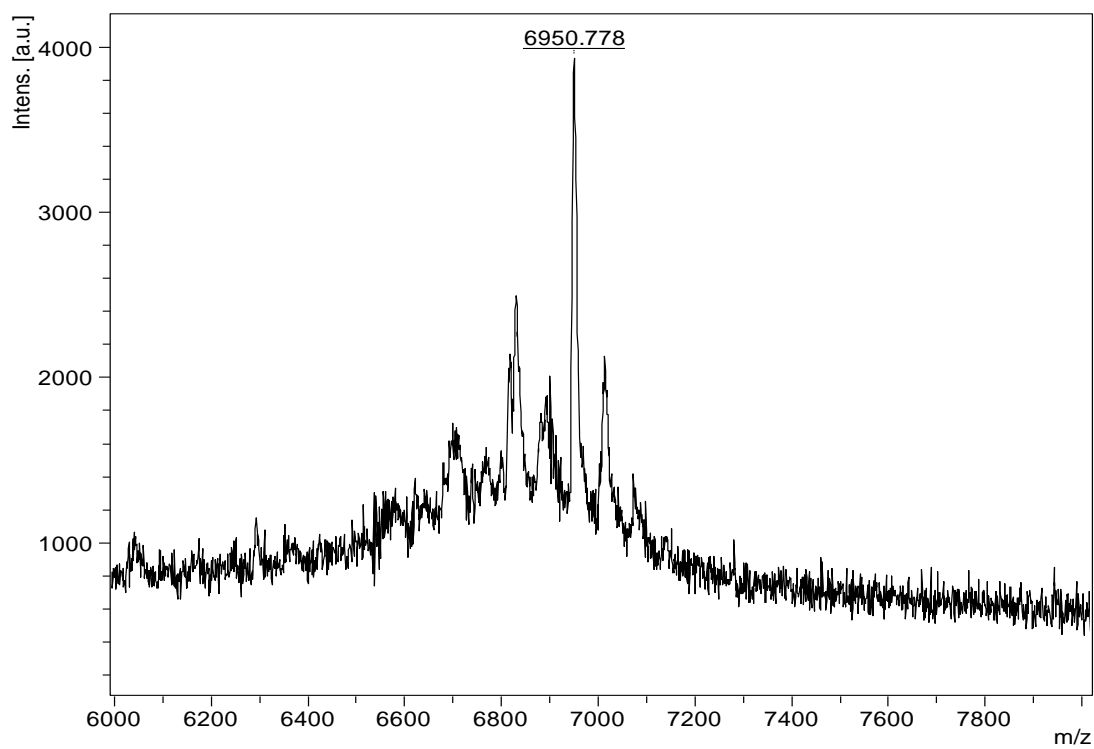

Quad-22mer-5FU

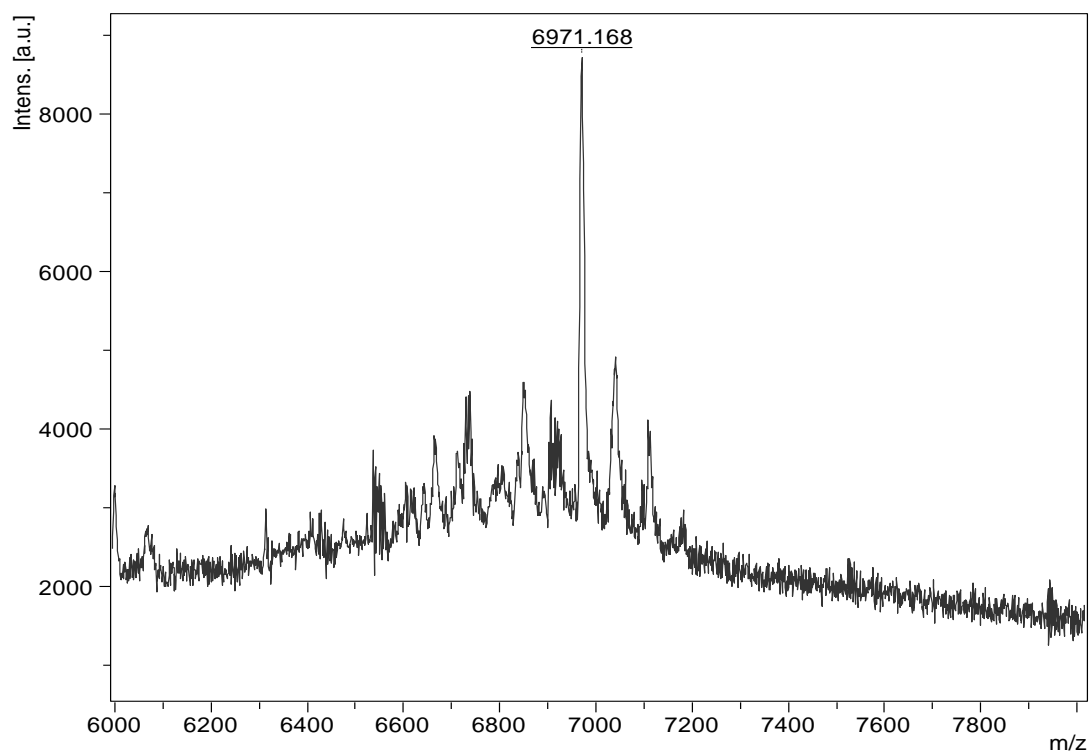

Quad-22mer-5hmU

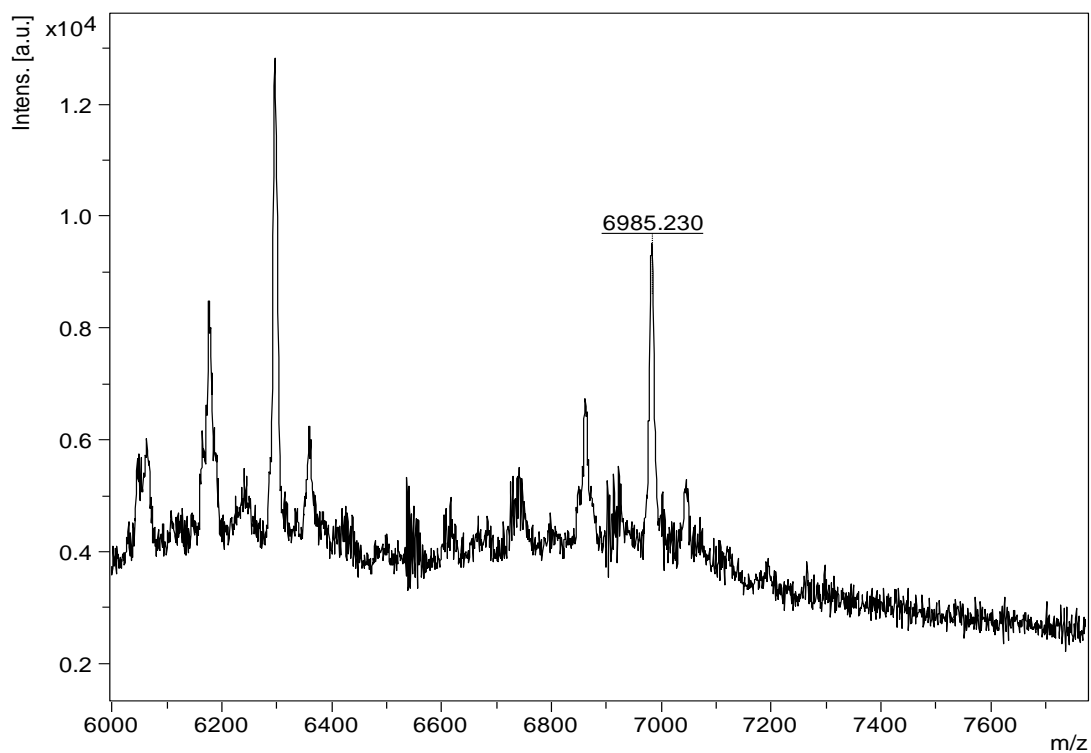

Quad-22mer-THF

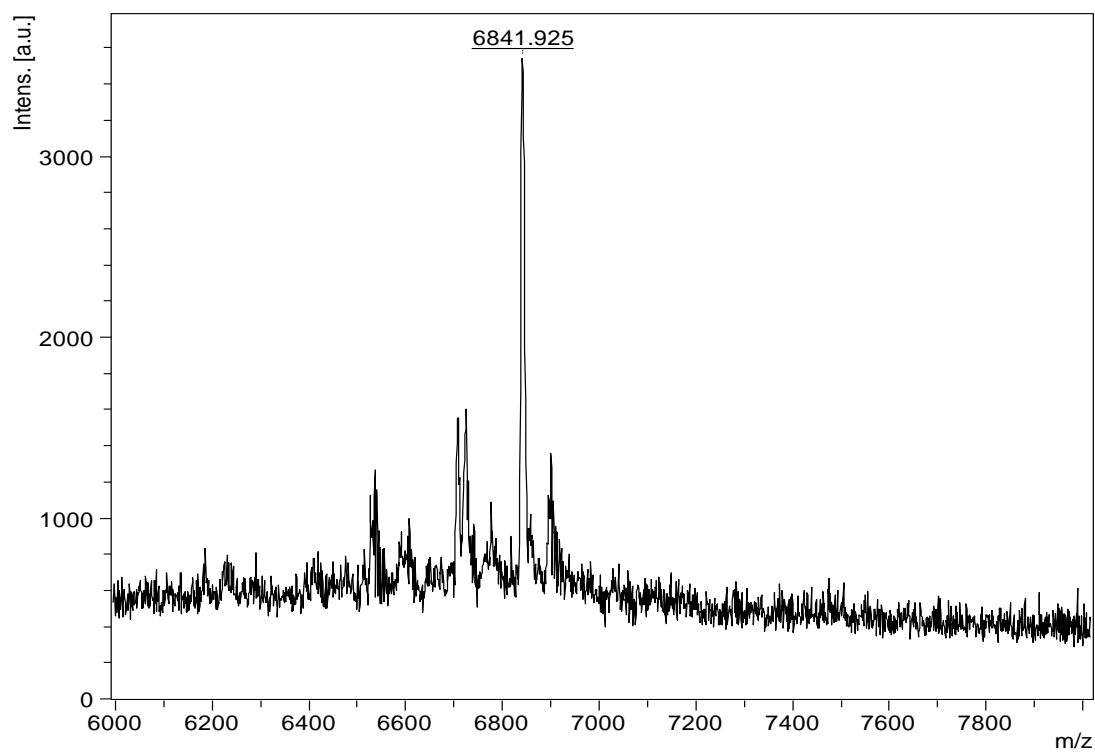

Quad-22mer-T-FAM

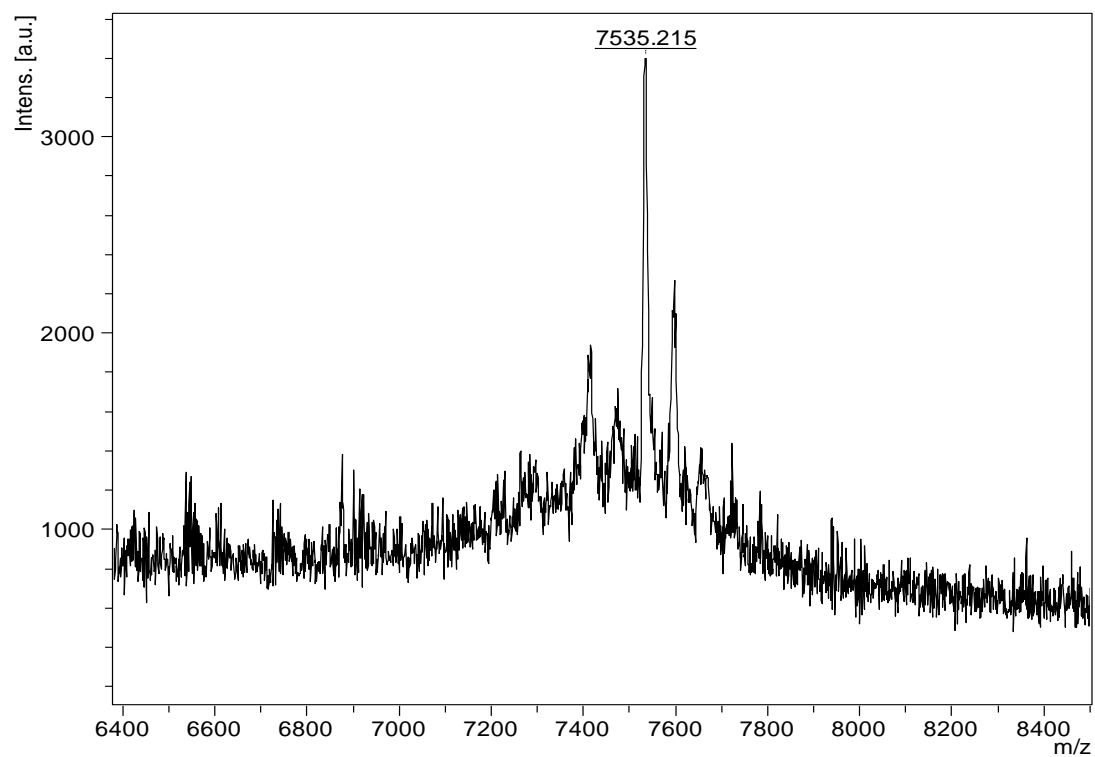



Quad-22mer-U-FAM

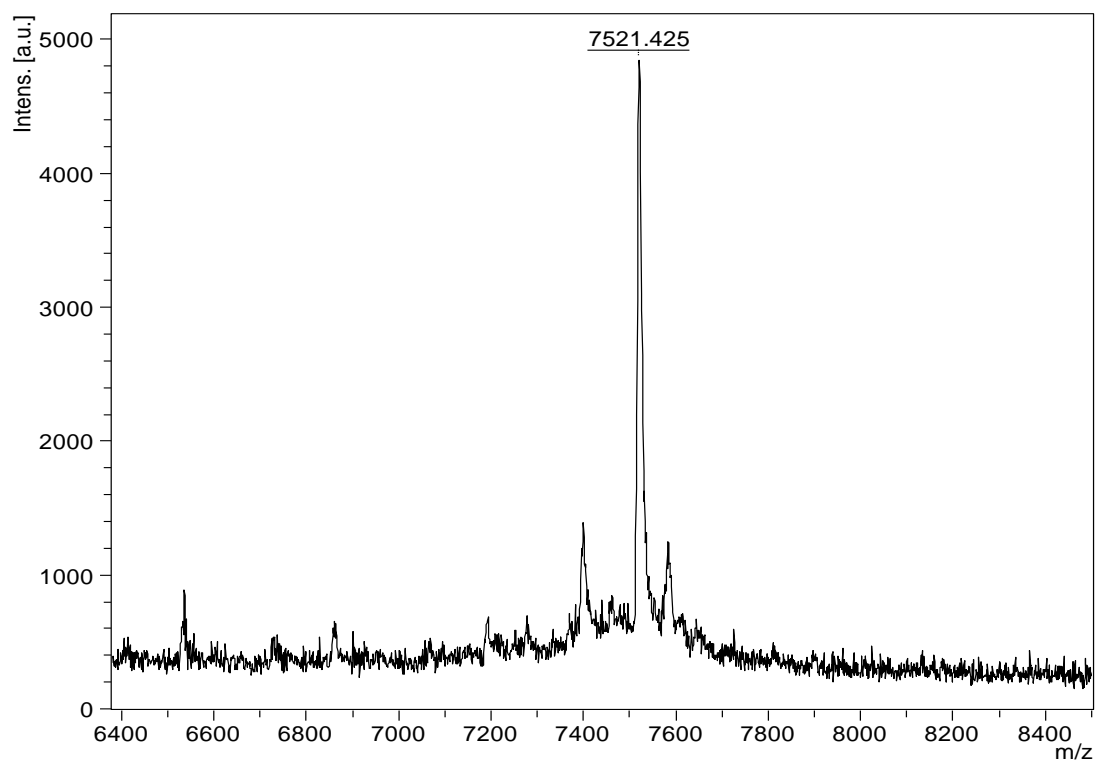

Quad-22mer-5FU-FAM

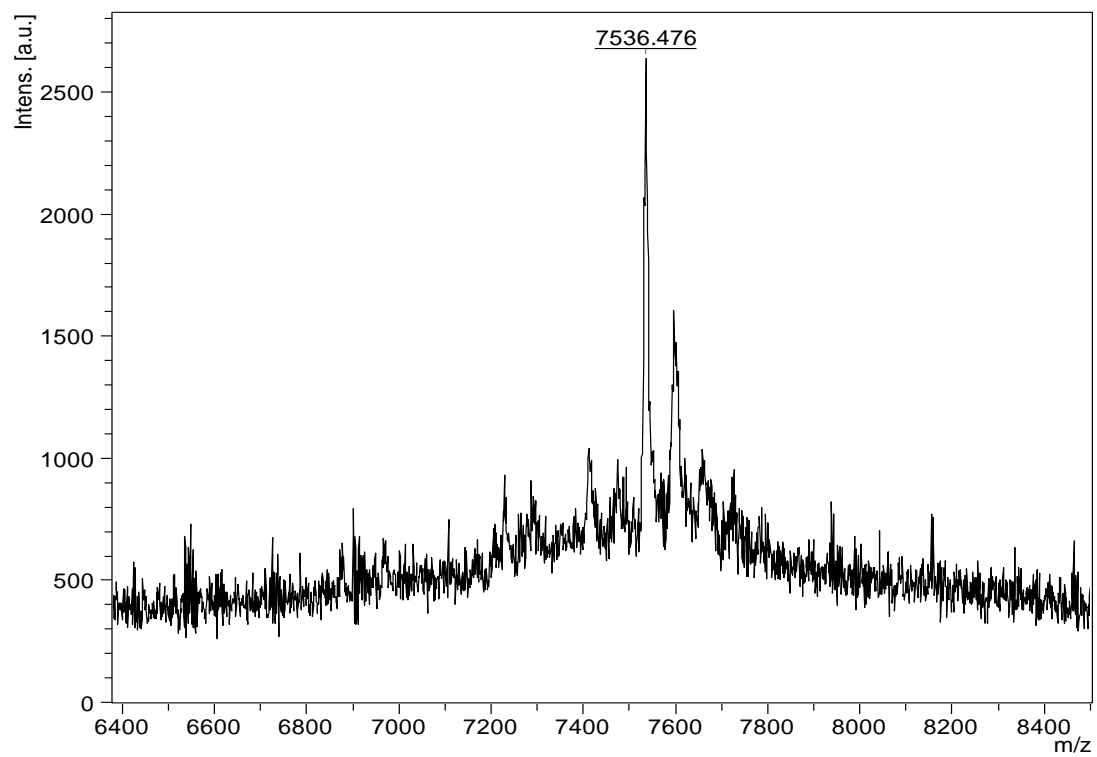

### Quad-22mer-5hmU-FAM

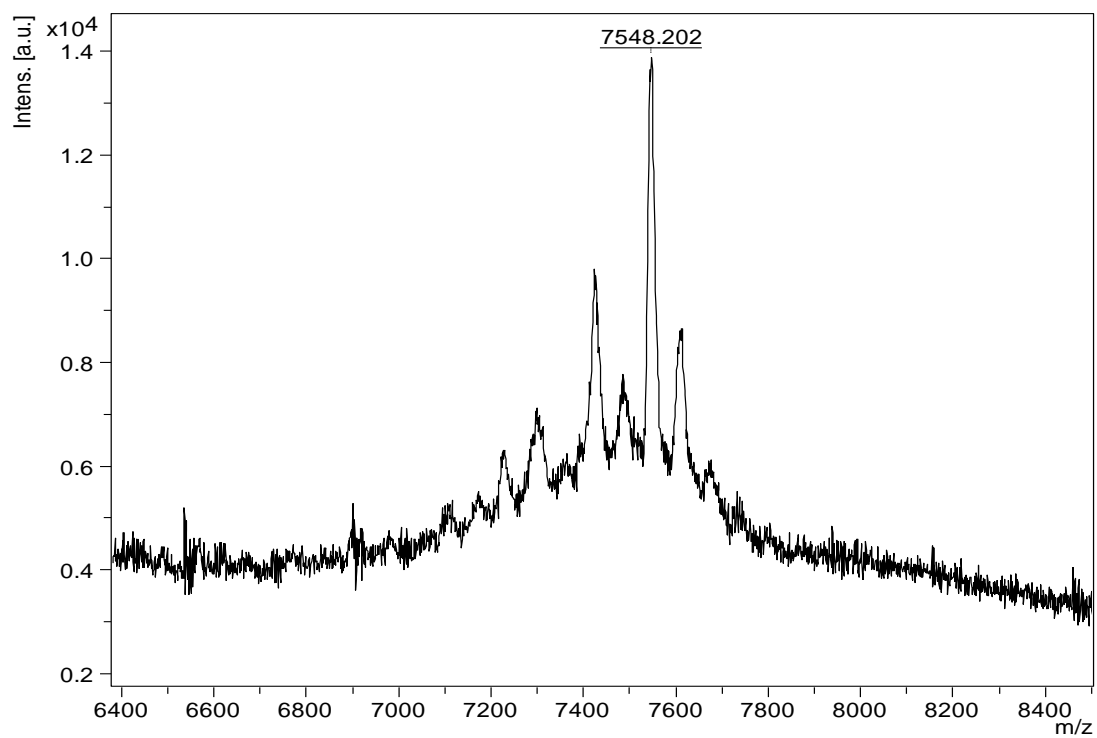

### Quad-22mer-THF-FAM

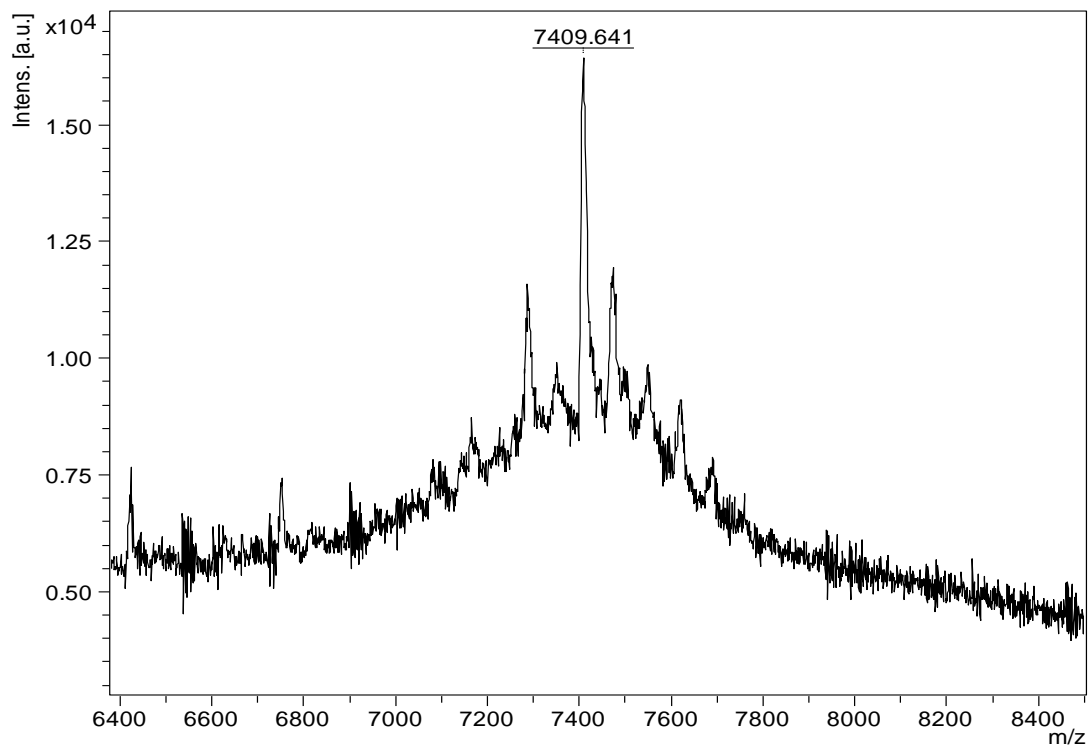

Quad-22mer-T-FAM-BHQ1

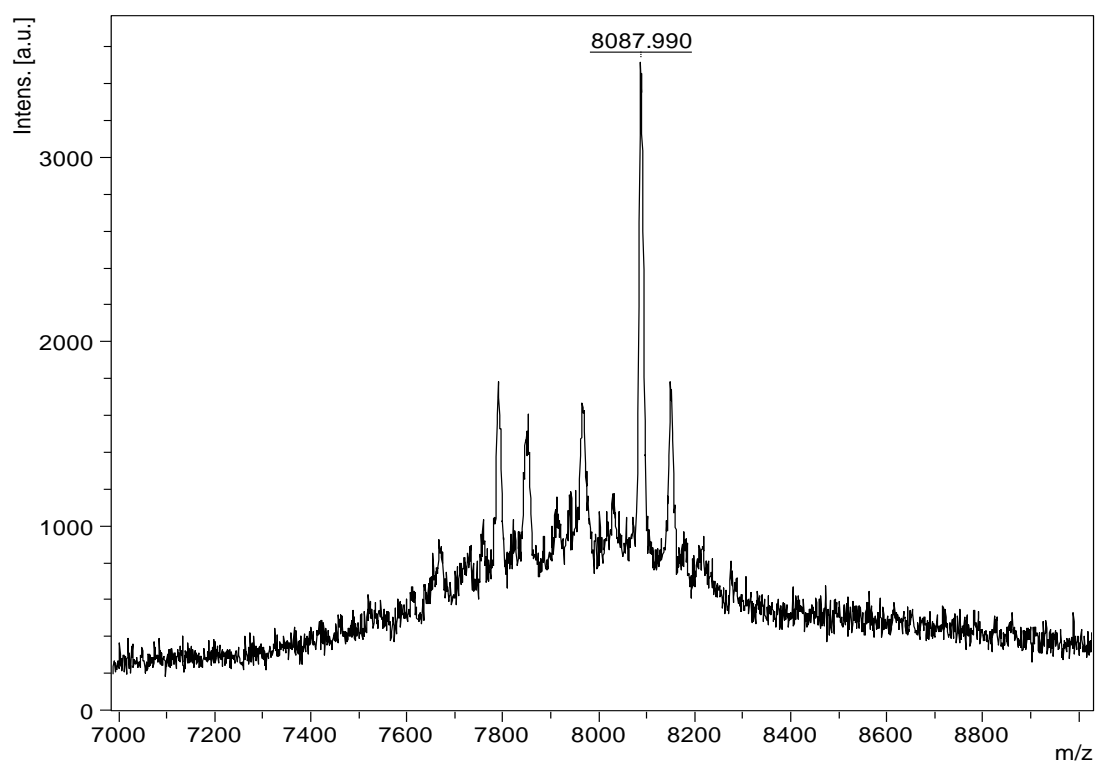

Quad-22mer-U-FAM-BHQ1

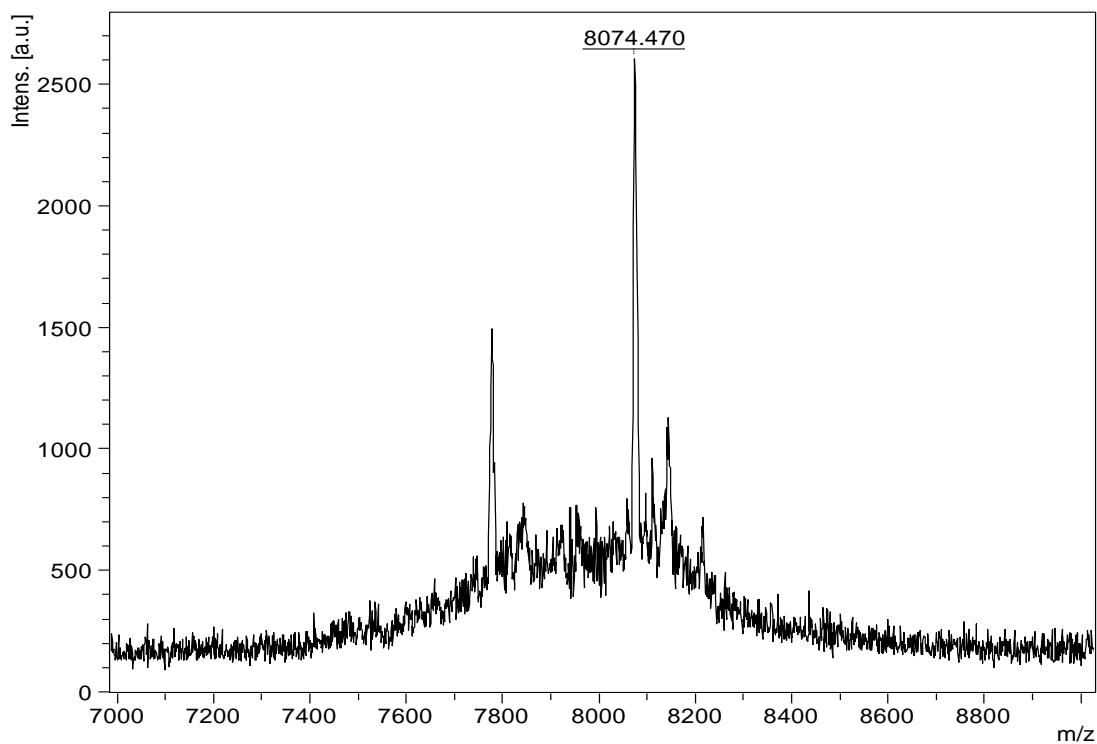

Quad-22mer-5FU-FAM-BHQ1

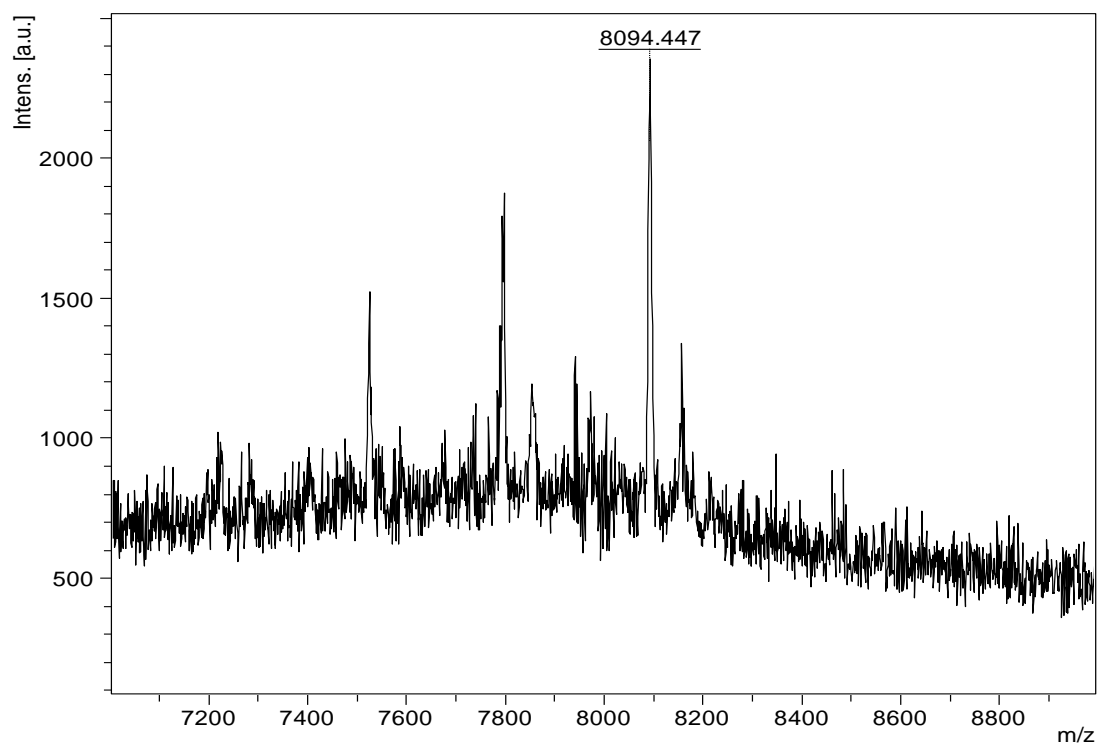

Quad-22mer-5hmU-FAM-BHQ1

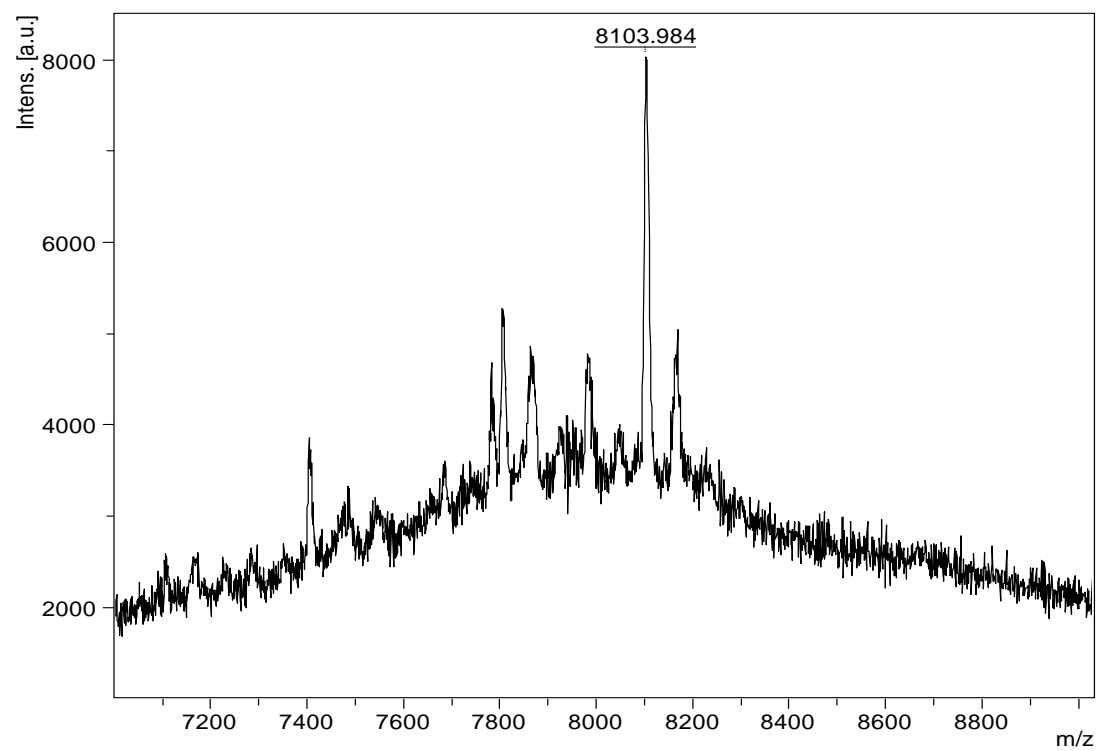

Quad-22mer-THF-FAM-BHQ1

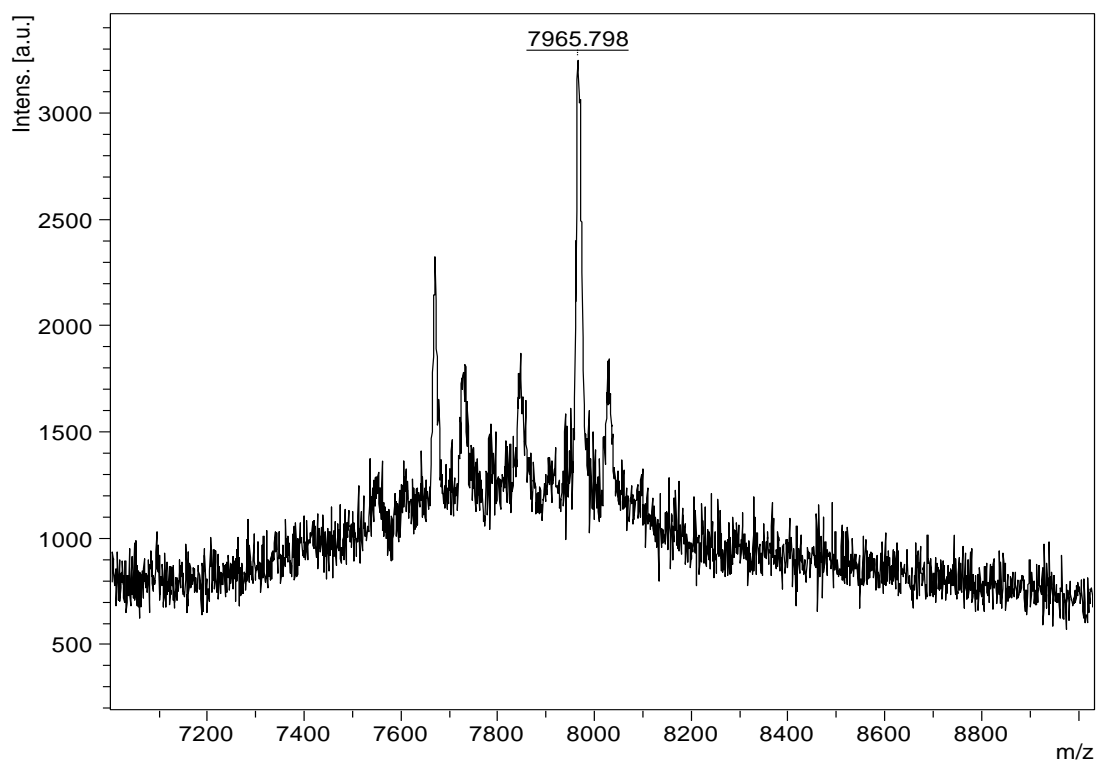

Quad-11mer-FAM

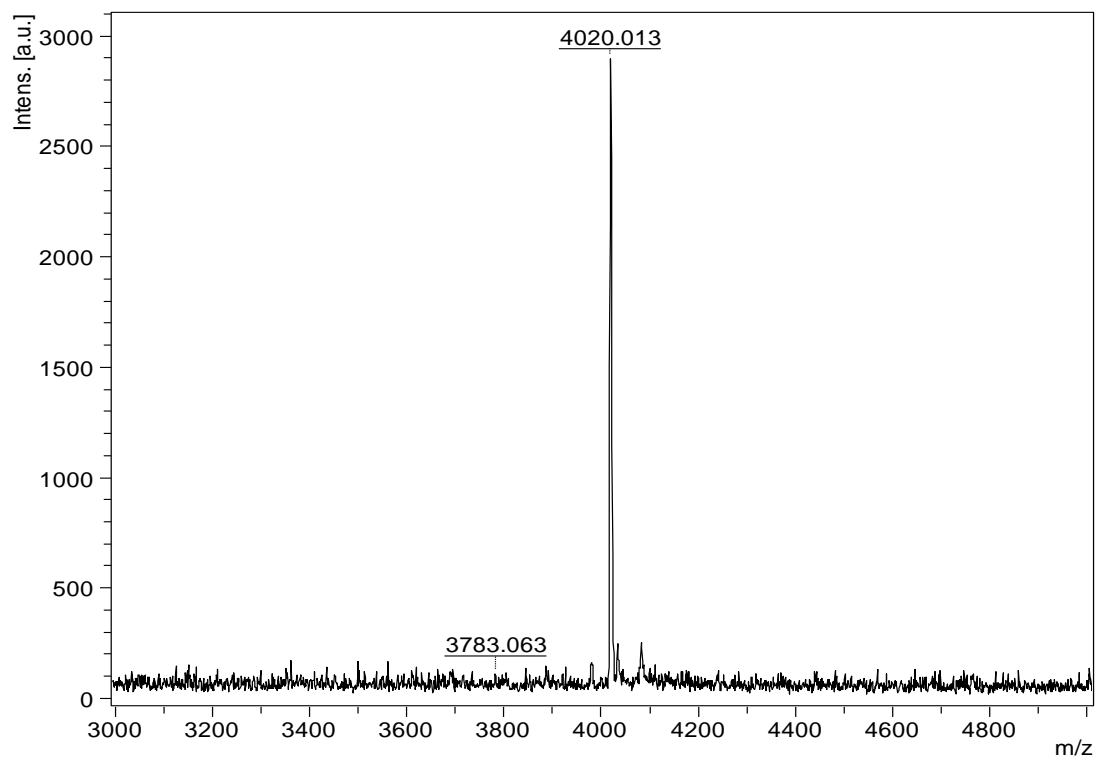

Quad-10mer-BHQ1-phos

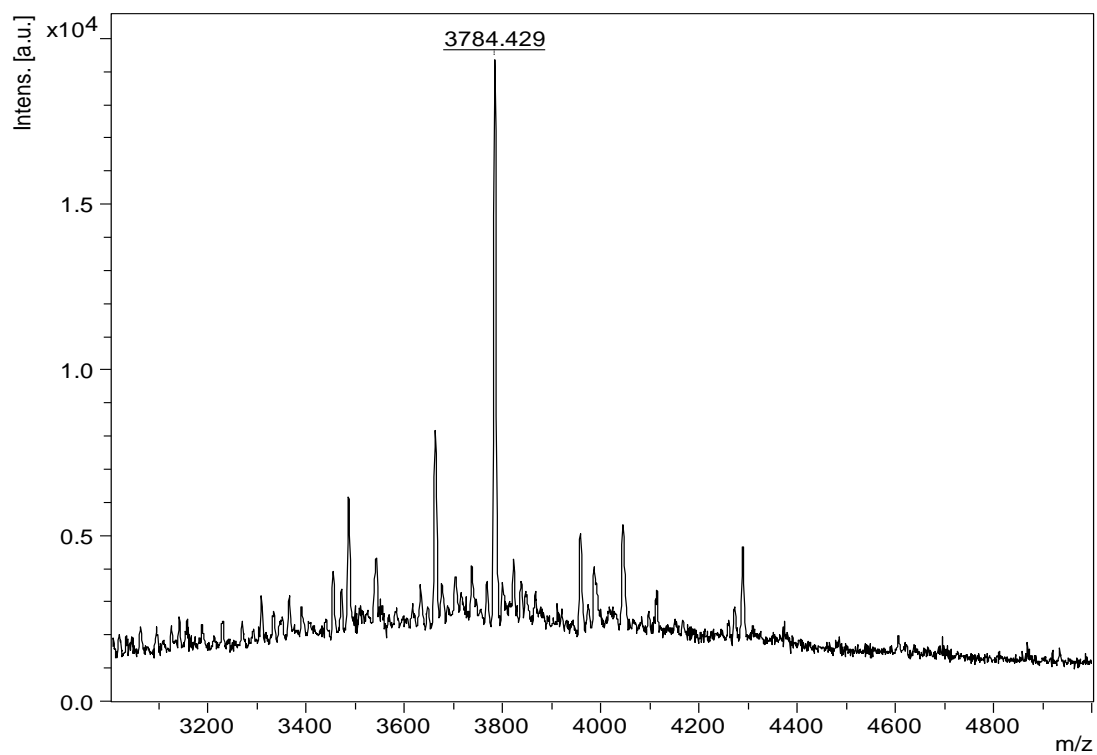

Quad-22mer-T-Comp

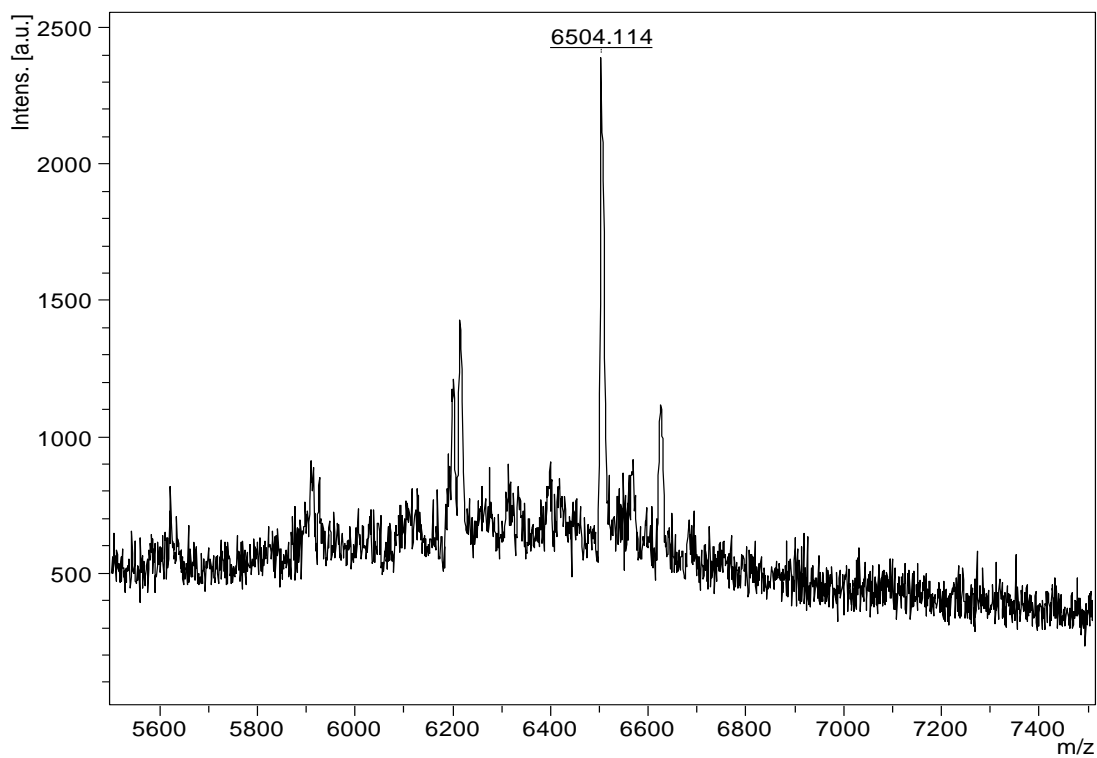

### Quad-22mer-U-Comp

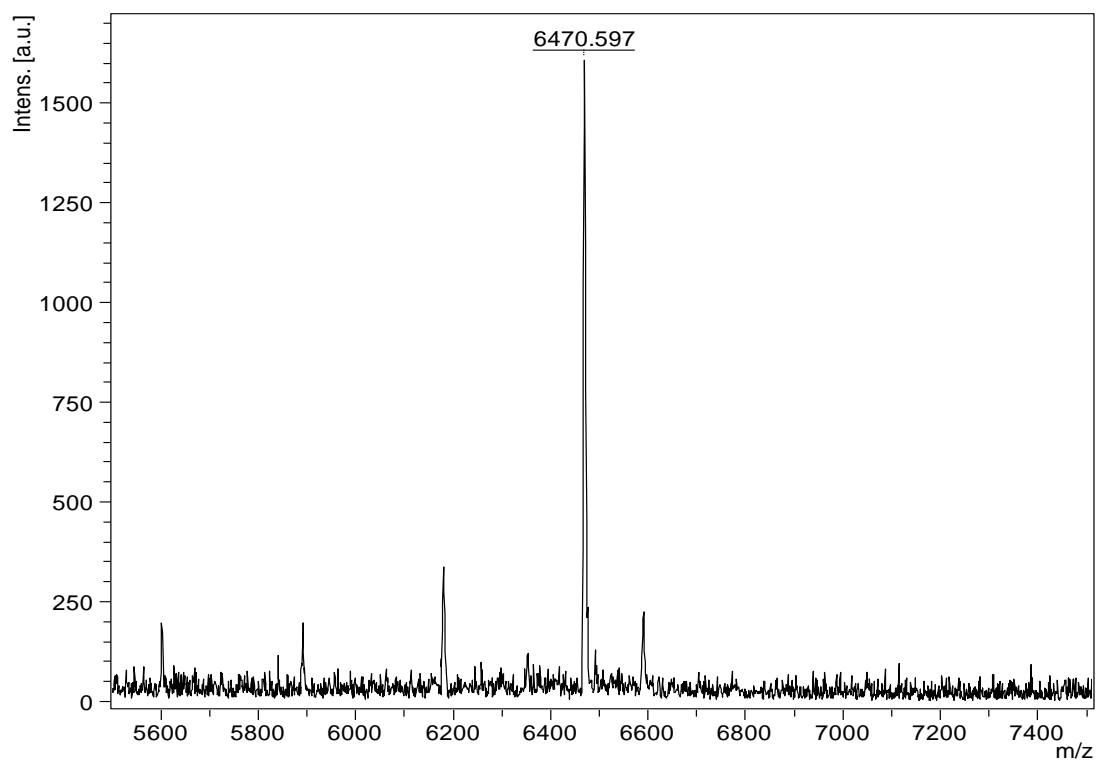

### Quad-22mer-THF-Comp

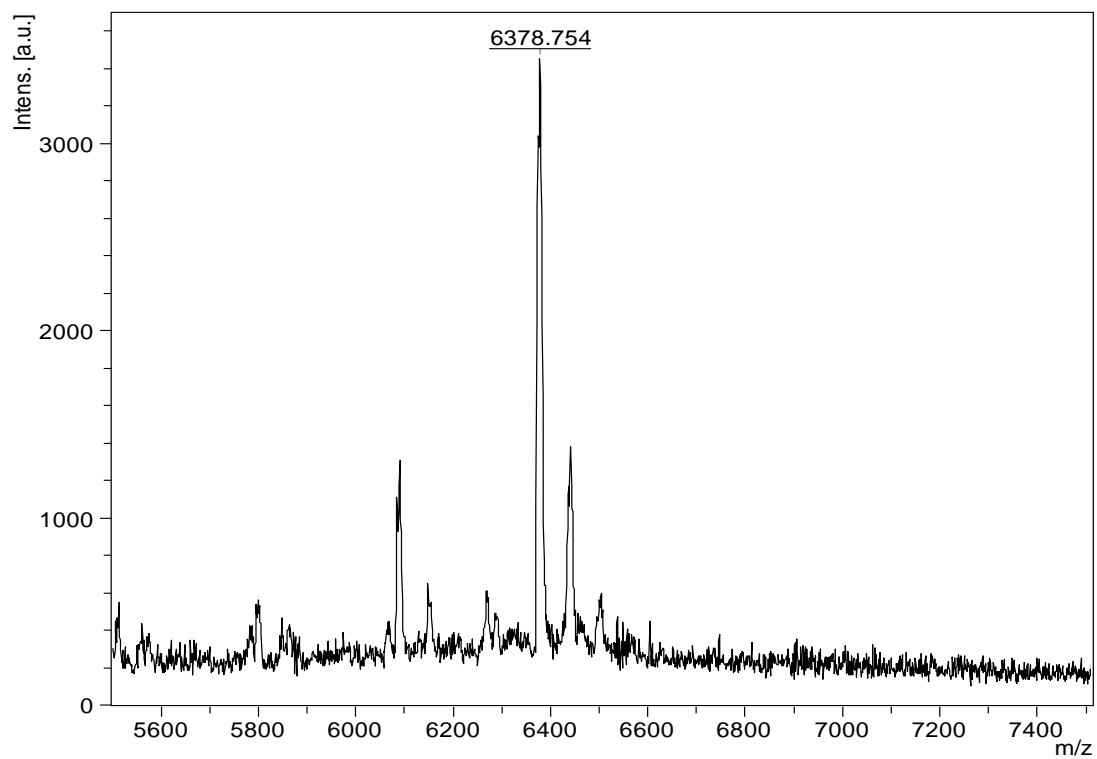

### Quad-12mer-phos

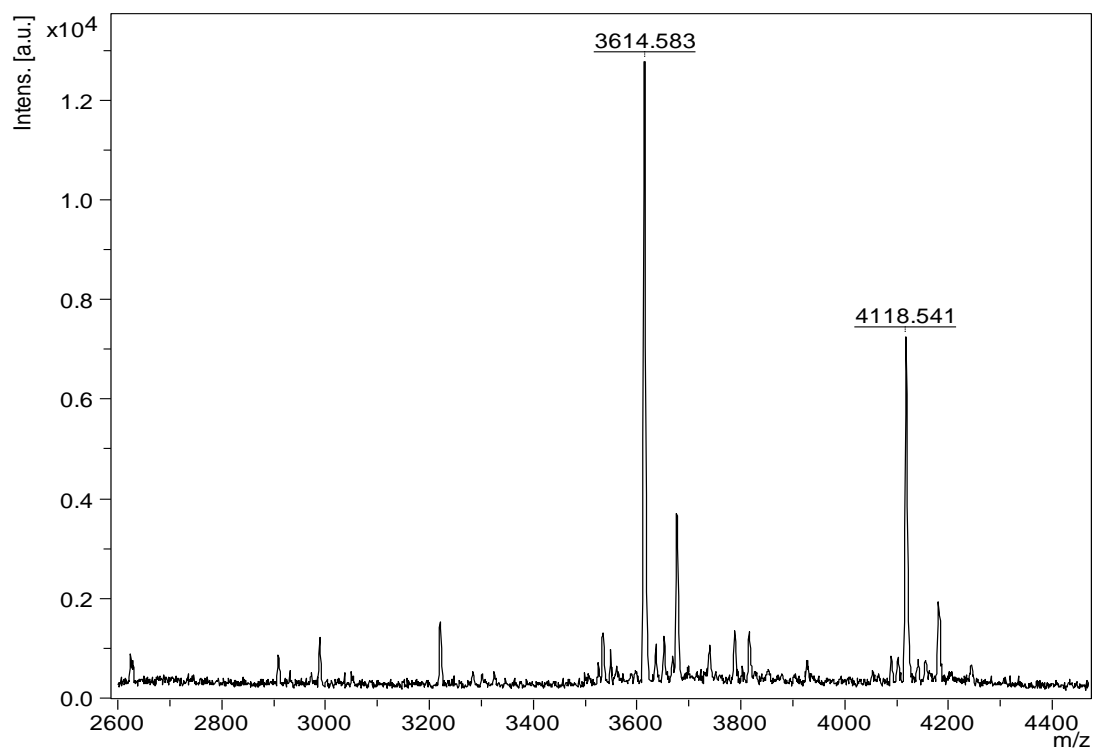

### Quad-9mer

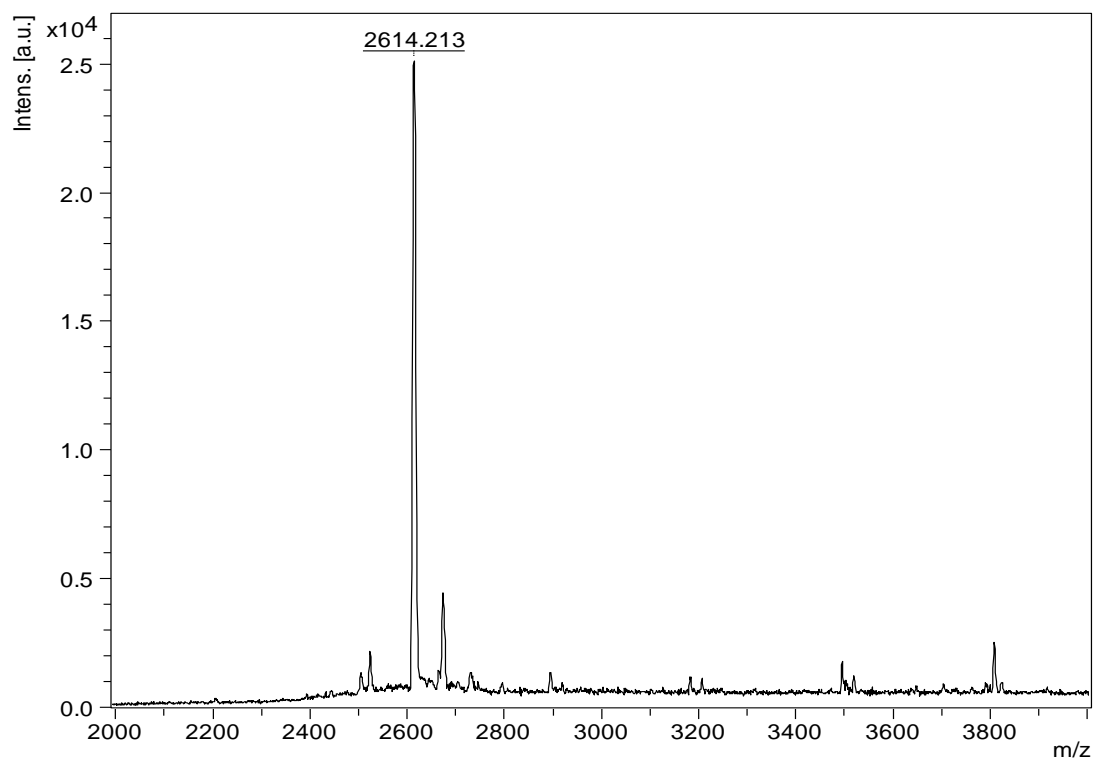



# Quad-22mer-U-Comp-Cy5

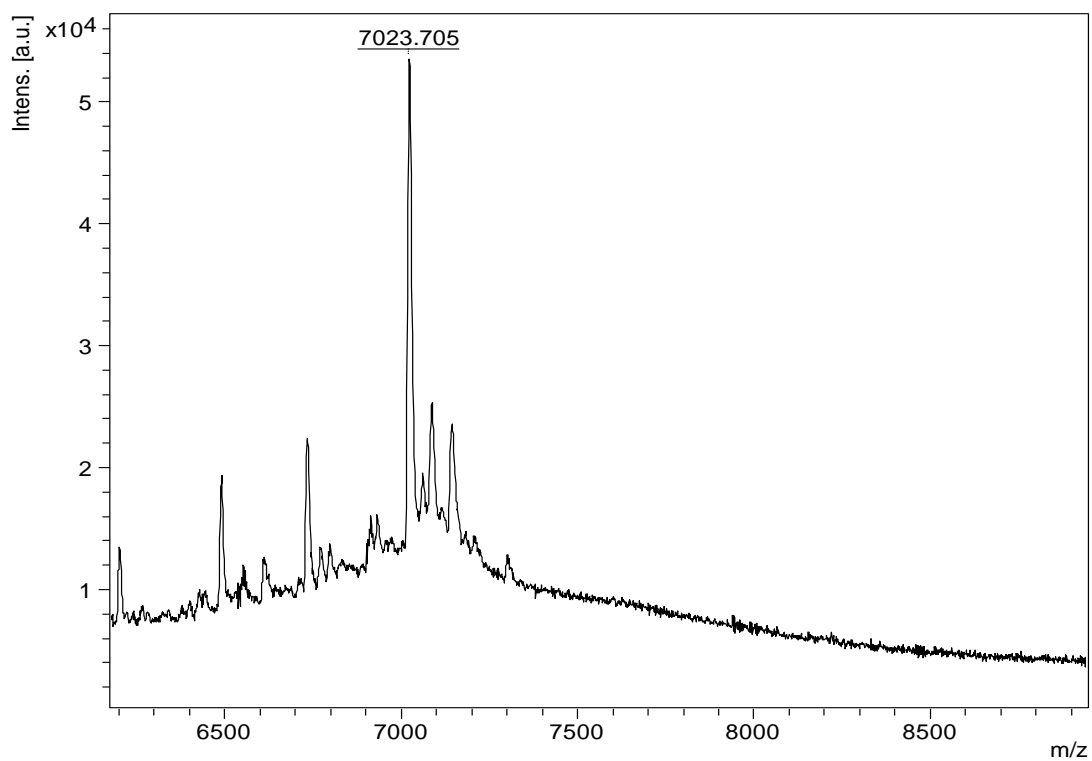

# 22mer-nonquad\_5hmU

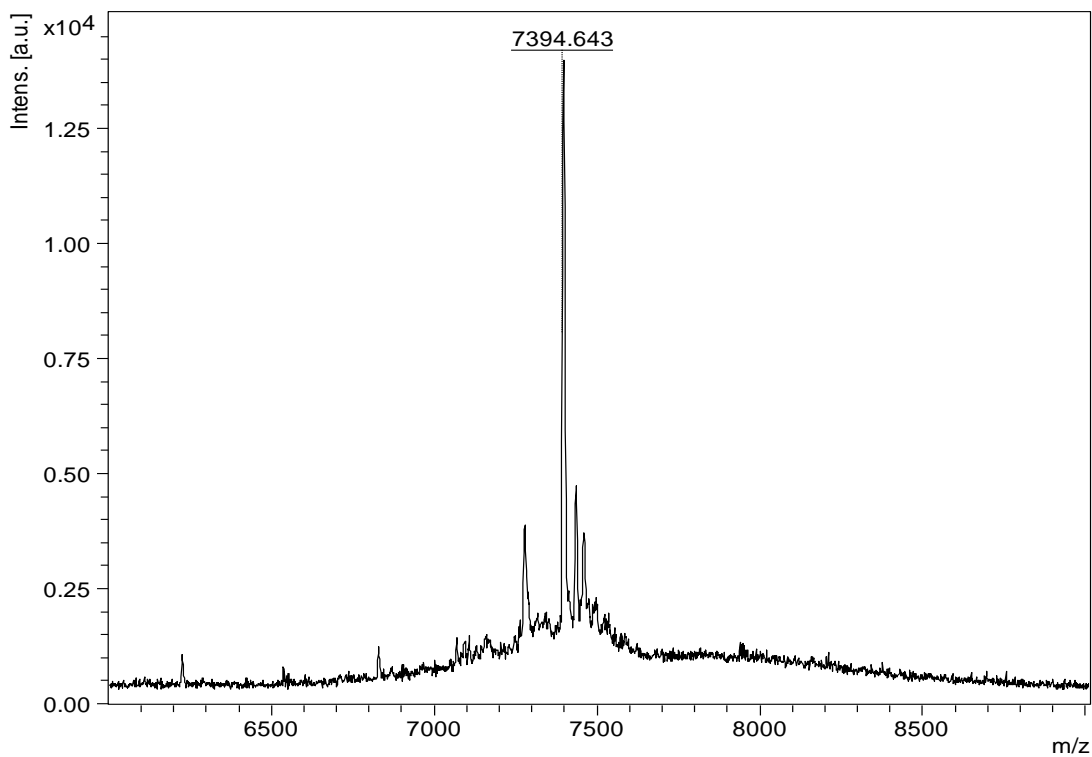

22mer-nonquad\_U

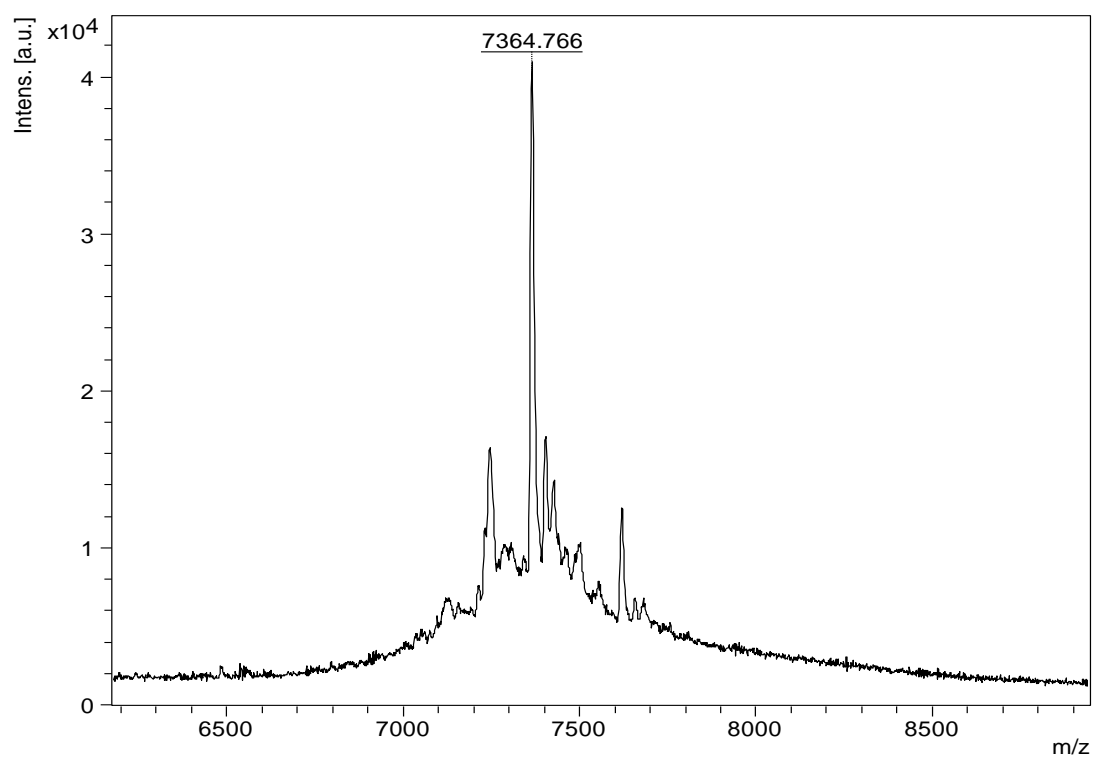

22mer-nonquad\_compA

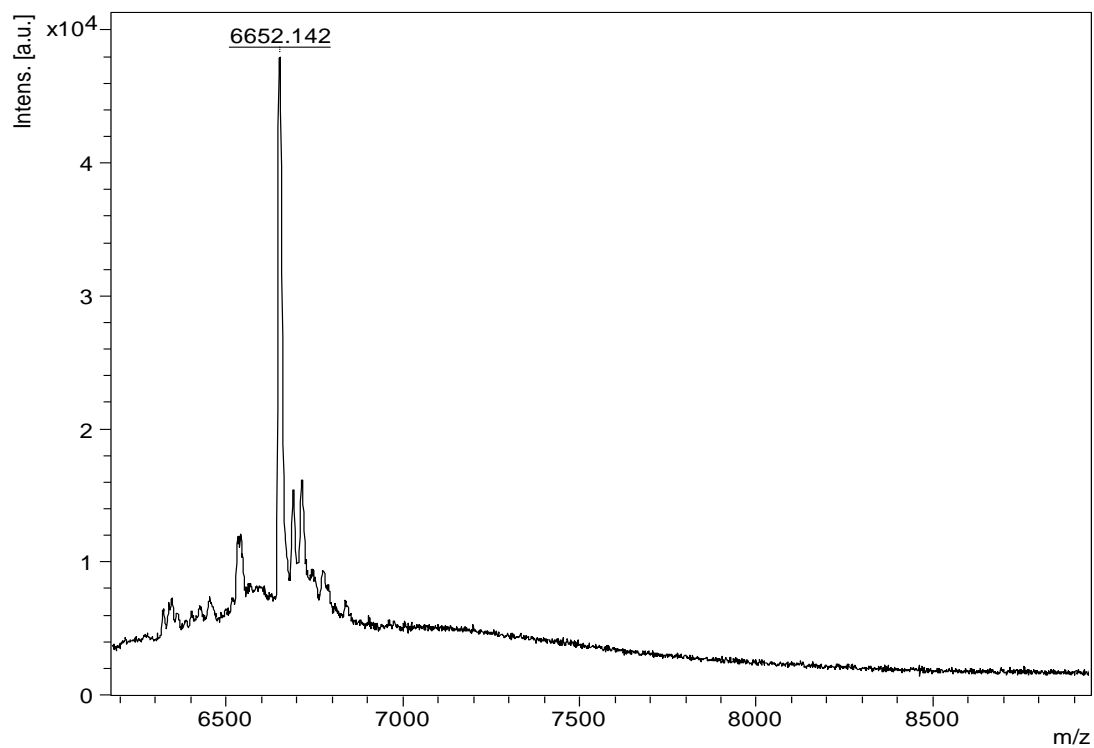

## D. HPLC results for nucleoside standards and methods

**Table 3: HPLC of Nucleoside Standards:** Analysis was done on a Thermo Finnigan Surveyor HPLC with a Supelcosil LC-18-S column (250 x 4.6 mm) and a gradient of methanol in 0.1% formic acid (pH 4). [Data file: D:\Linda\Data\2022\_April\Quad\_std\_mix2]

| Nucleoside | Retention Time (minutes) | $\lambda_{\text{max}}$ |
|------------|--------------------------|------------------------|
| dU         | 13.11                    | 262                    |
| 5hmdU      | 13.11                    | 264                    |
| 5FdU       | 13.98                    | 268                    |
| dC         | 15.14                    | 279                    |
| dT         | 19.66                    | 267                    |
| dG         | 22.23                    | 254                    |
| dA         | 25.16                    | 258                    |

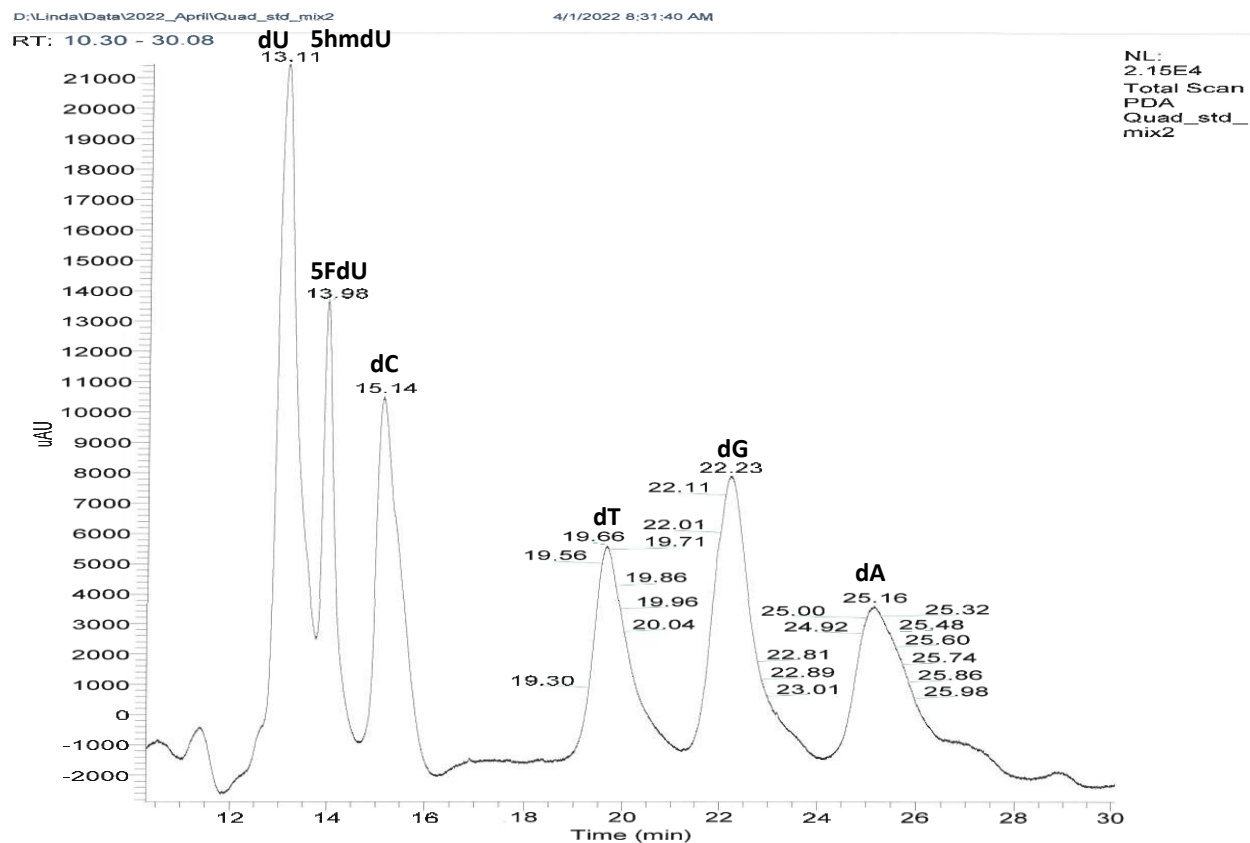

## E. UV spectra from HPLC PDA for nucleoside standards

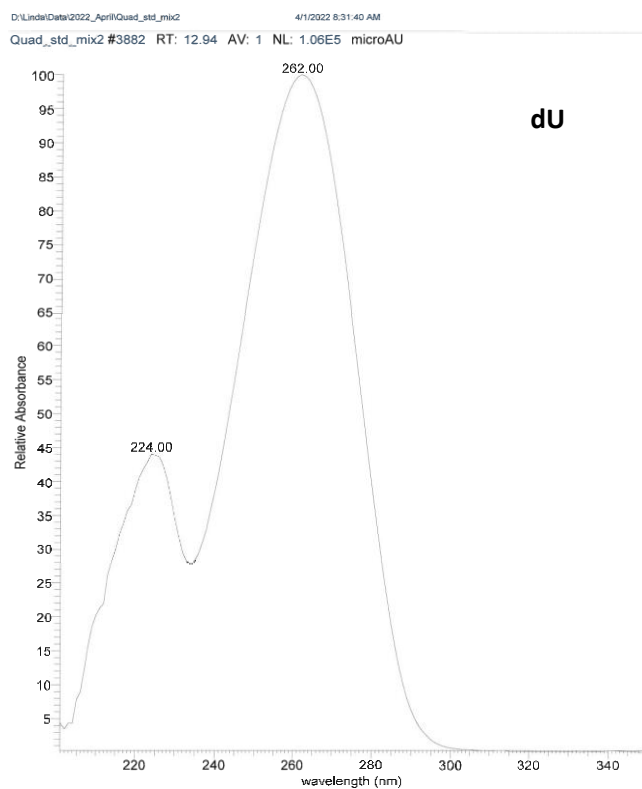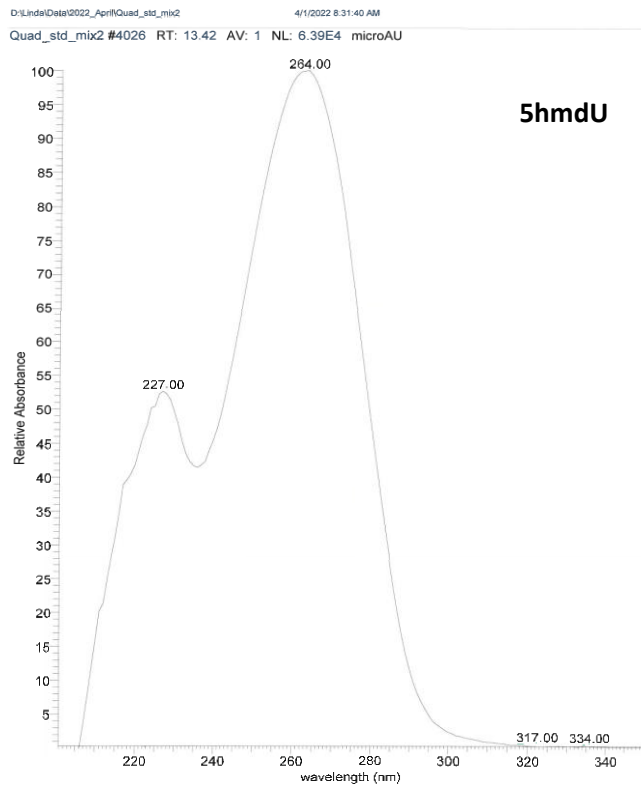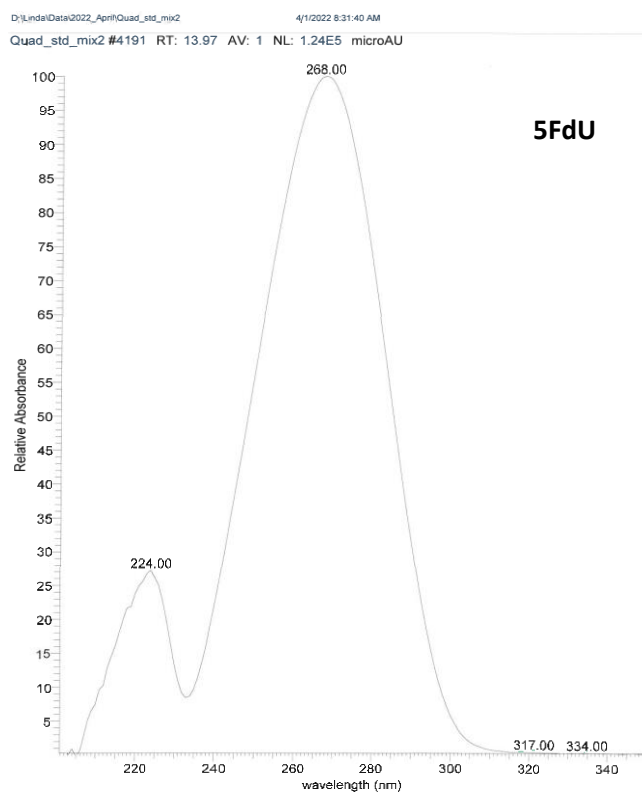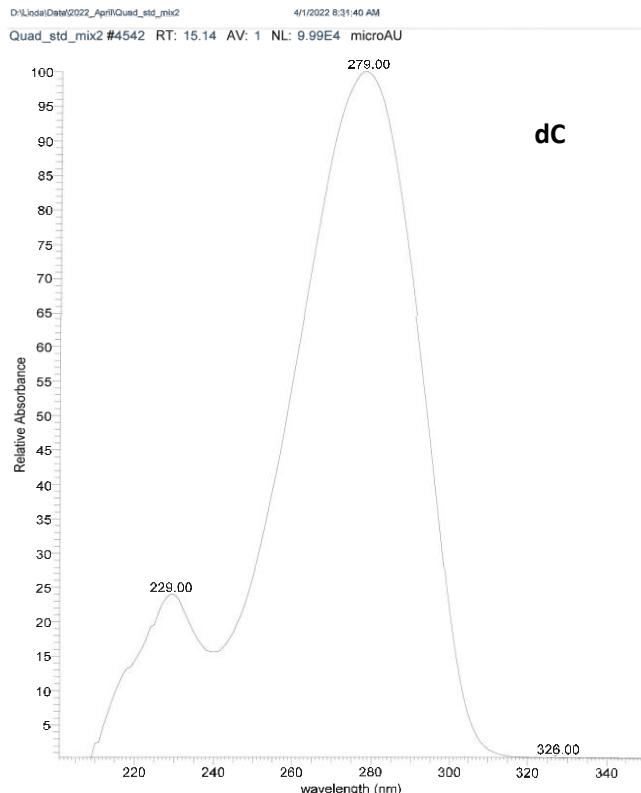

D:\Linda\Data\2022\_April\Quad\_std\_mix2 4/1/2022 8:31:40 AM  
Quad\_std\_mix2 #5896 RT: 19.65 AV: 1 NL: 5.80E4 microAU

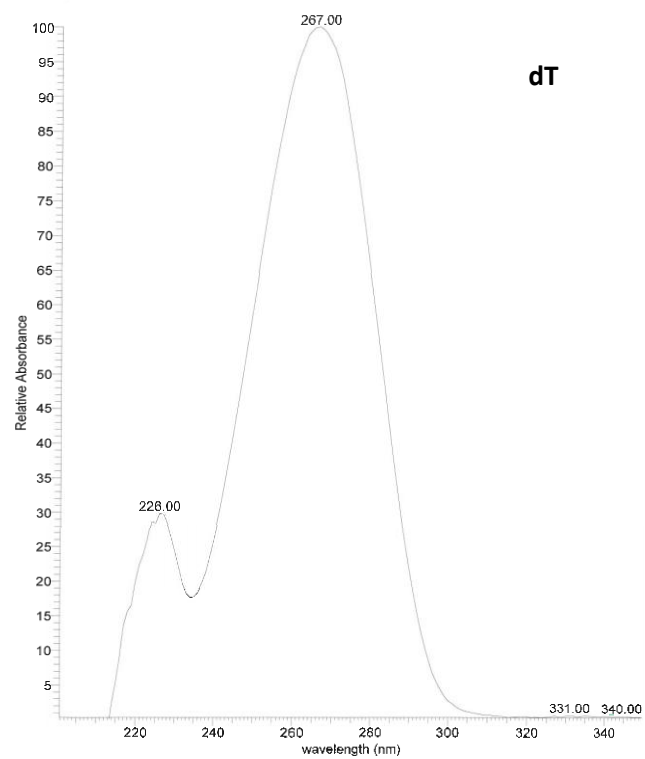

D:\Linda\Data\2022\_April\Quad\_std\_mix2 4/1/2022 8:31:40 AM  
Quad\_std\_mix2 #6660 RT: 22.20 AV: 1 NL: 6.08E4 microAU

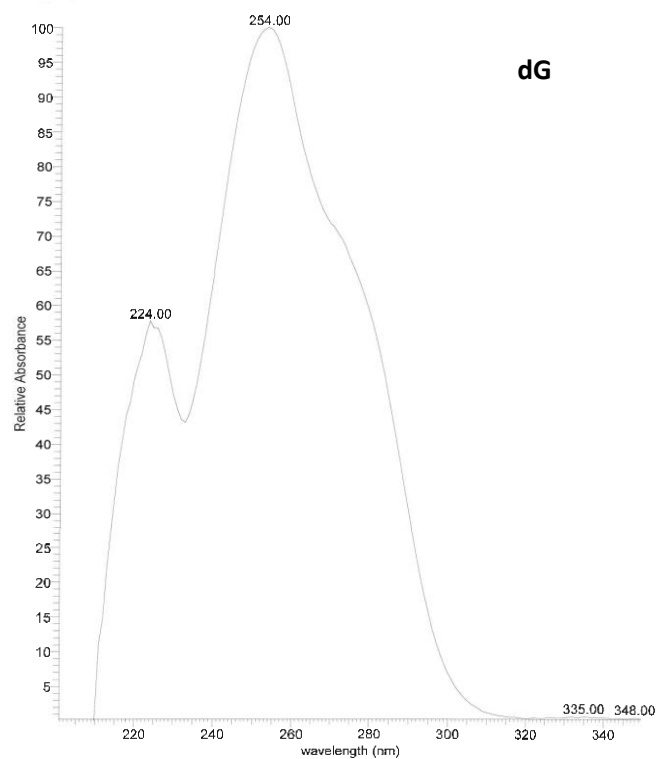

D:\Linda\Data\2022\_April\Quad\_std\_mix2 4/1/2022 8:31:40 AM  
Quad\_std\_mix2 #7533 RT: 25.11 AV: 1 NL: 4.55E4 microAU

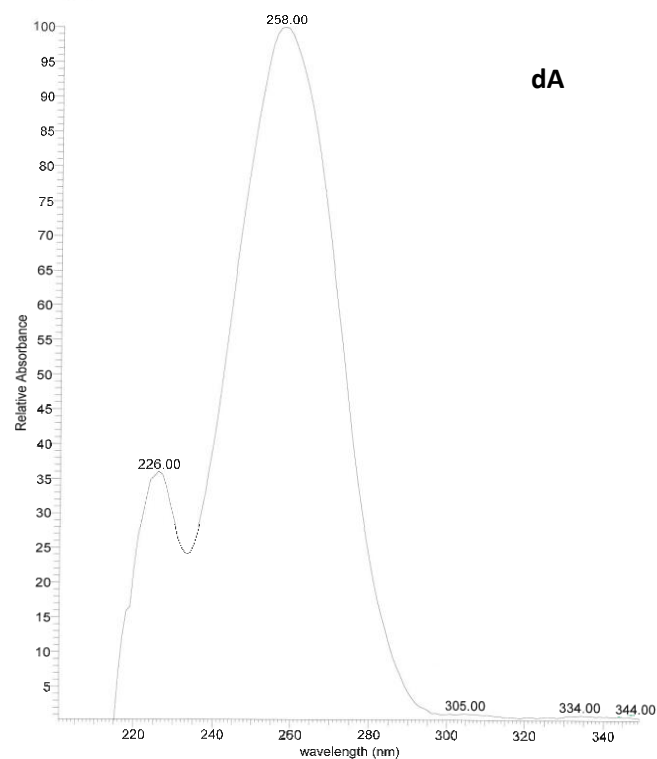

## F. Enzyme digestion results for oligonucleotides and methods

**Table 4: Enzyme Digestion and HPLC Analysis of 18mer Oligonucleotides (see Table 1 for oligonucleotide sequence)**

| Oligo                    | Nucleoside | RT (minutes) | $\lambda_{\text{max}}$ | Data File (D:\Linda\Data)       |
|--------------------------|------------|--------------|------------------------|---------------------------------|
| Quad-22mer-U             | dU         | 10.59        | 262                    | \2022_March\L-9123              |
| Quad-22mer-5FU           | 5FdU       | 11.63        | 269                    | \2022_April\L-9143              |
| Quad-22mer-5hmU          | 5hmdU      | 14.68        | 265                    | \2022_April\L-1051_220401142442 |
| Quad-22mer-U-FAM         | dU         | 11.98        | 261                    | \2022_March\L-9113              |
| Quad-22mer-5FU-FAM       | 5FdU       | 17.29        | 269                    | \2022_April\L-1011              |
| Quad-22mer-5hmU-FAM      | 5hmdU      | 13.08        | 263                    | \2022_April\L-1041_220401133628 |
| Quad-22mer-U-FAM-BHQ1    | dU         | 13.02        | 261                    | \2022_March\L-9118              |
| Quad-22mer-5FU-FAM-BHQ1  | 5FdU       | 16.70        | 269                    | \2022_April\L-1016              |
| Quad-22mer-5hmU-FAM-BHQ1 | 5hmdU      | 16.25        | 264                    | \2022_April\L-1046              |
| Quad-22mer-U-Comp        | dU         | 12.29        | 262                    | \2022_March\L-9128              |
| Quad-22mer-U-Comp-Cy5    | dU         | 6.44         | 262                    | \2022_April\L-1131_220427094628 |
| 22mer-nonquad_5hmU       | 5hmdU      | 15.99        | 264                    | \2022_April\L-1154              |
| 22mer-nonquad_U          | dU         | 6.6          | 261                    | \2022_April\L-1121              |

**Enzyme Digestion:** Per 1 OD oligo, water (36  $\mu\text{L}$ ) and nuclease P1 buffer (4  $\mu\text{L}$ ) were added. Nuclease P1 (0.4  $\mu\text{L}$ ) was added and the mixture heated to 37°C for 1 hour. Water (7.2  $\mu\text{L}$ ) was added along with bacterial alkaline phosphatase buffer (0.8  $\mu\text{L}$ ). Bacterial alkaline phosphatase (0.2  $\mu\text{L}$ ) was added and the mixture was heated to 37°C for 1 hour. An additional 18.07  $\mu\text{L}$  of water was added and 25  $\mu\text{L}$  was injected on the Thermo Finnigan Surveyor HPLC using a Supelcosil LC-18-S column (250 x 4.6 mm) and a gradient of methanol in 0.1% formic acid, pH 4.

Nuclease P1 (New England BioLabs M0660S): Storage buffer: 2 mM Tris-HCl, 50 mM NaCl, 1 mM  $\text{ZnCl}_2$ , 50% glycerol, pH 7.2; 10x Reaction buffer: 500 mM sodium acetate pH 5.5

Bacterial alkaline phosphatase (Invitrogen 18011-015): Storage buffer: 10 mM Tris-HCl, pH 8, 120 mM NaCl, 50% (v/v) glycerol; 10x Reaction buffer: 100 mM Tris-HCl, pH 8.0

Reference:

G1. Fujimoto, J.; Tran, L. and Sowers, L. C. (1997) Synthesis and cleavage of oligodeoxynucleotides containing 5-hydroxyuracil residue at a defined site. *Chem. Res. Toxicol.* **10**, 1254-1258. DOI: 10.1021/TX970102B PMID: 9403179

## G. HPLC and UV spectra for enzyme digestion of oligonucleotides

Quad-22mer-U

D:\Linda\Data\2022\_March\L-9123

3/31/2022 3:10:19 PM

RT: 8.30 - 30.07

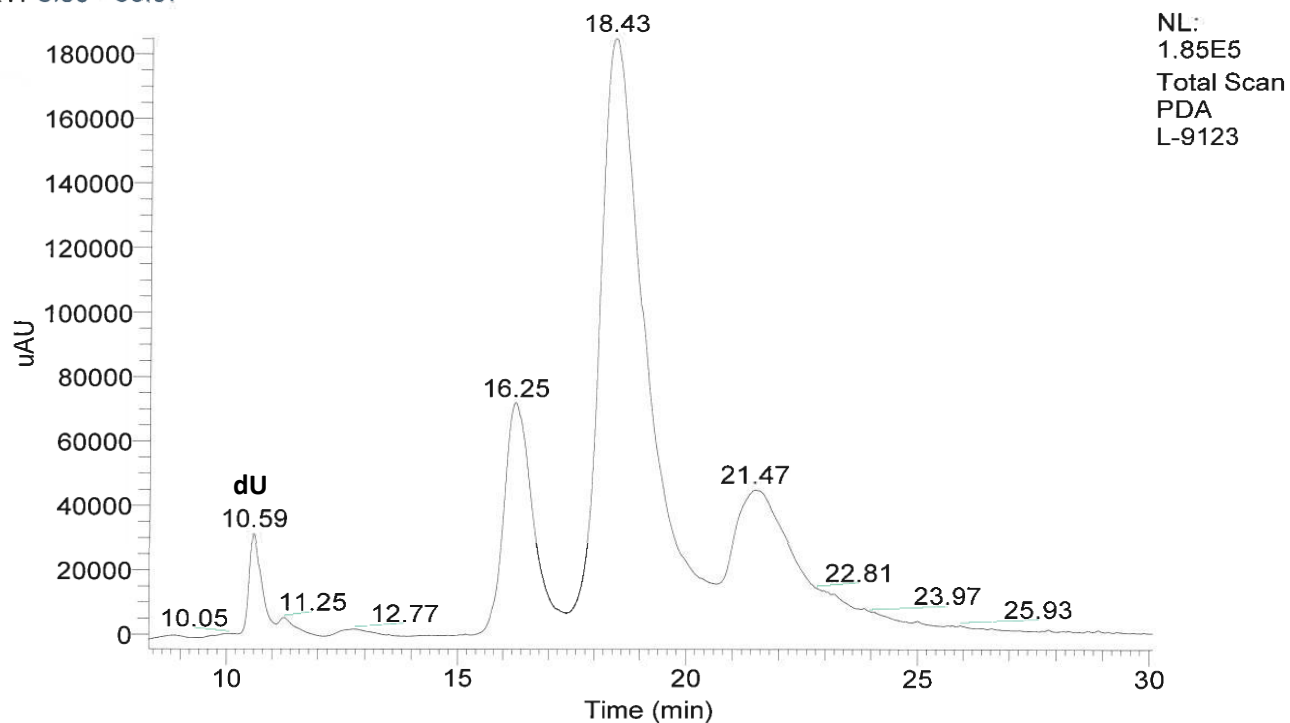

L-9123 #3174 RT: 10.58 AV: 1 NL: 2.69E5 microAU

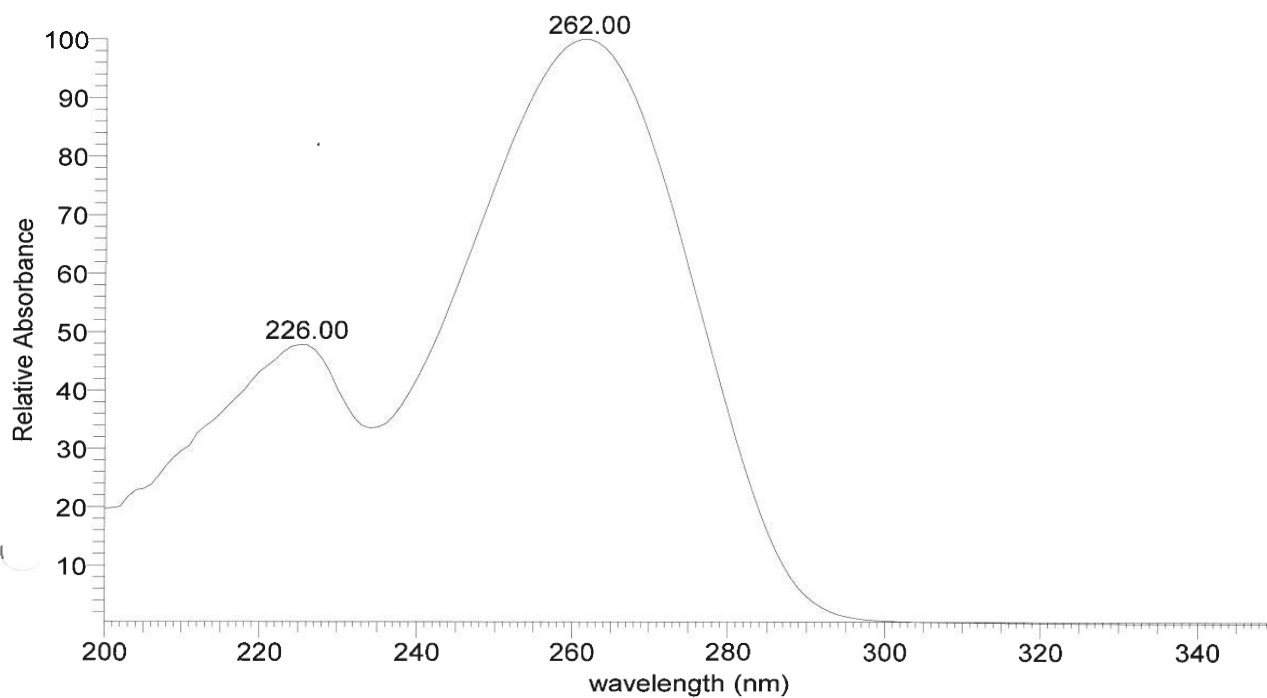

# Quad-22mer-5FU

D:\Linda\Data\2022\_April\L-9143

4/4/2022 10:30:45 AM

RT: 9.54 - 30.07

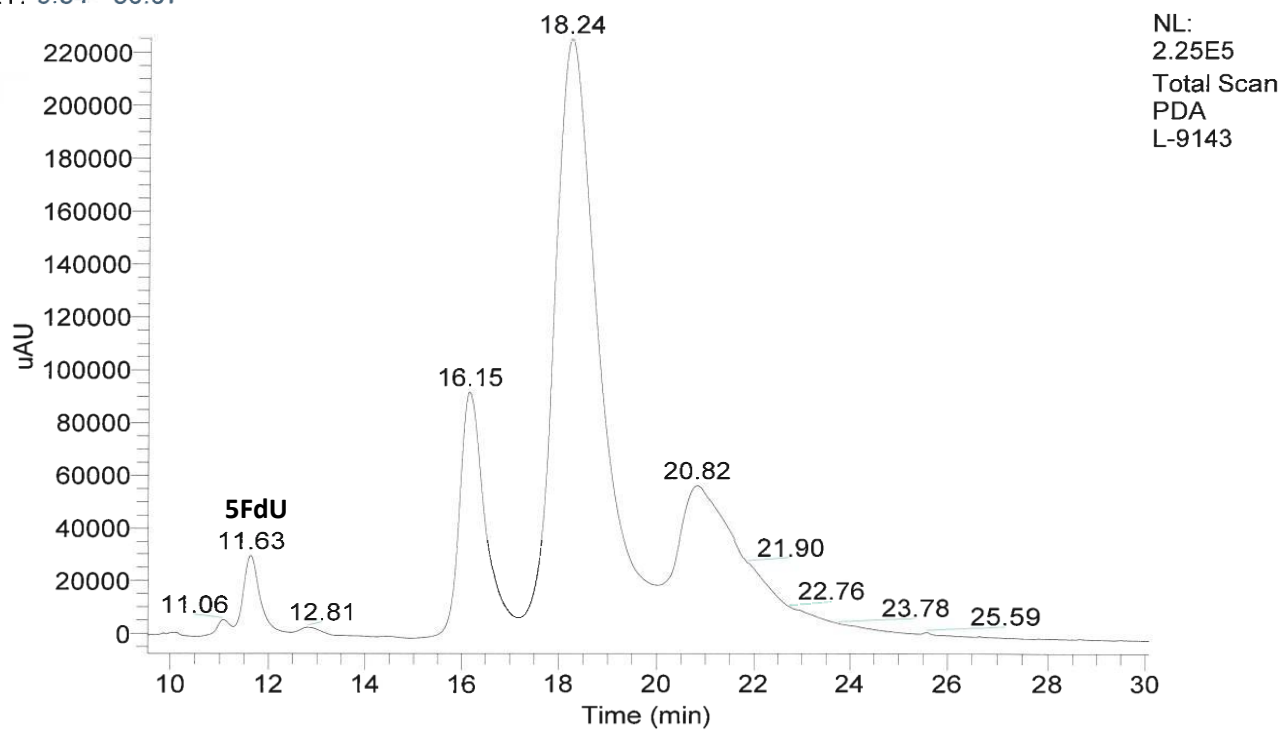

NL:  
2.25E5  
Total Scan  
PDA  
L-9143

L-9143 #3483 RT: 11.61 AV: 1 NL: 2.44E5 microAU

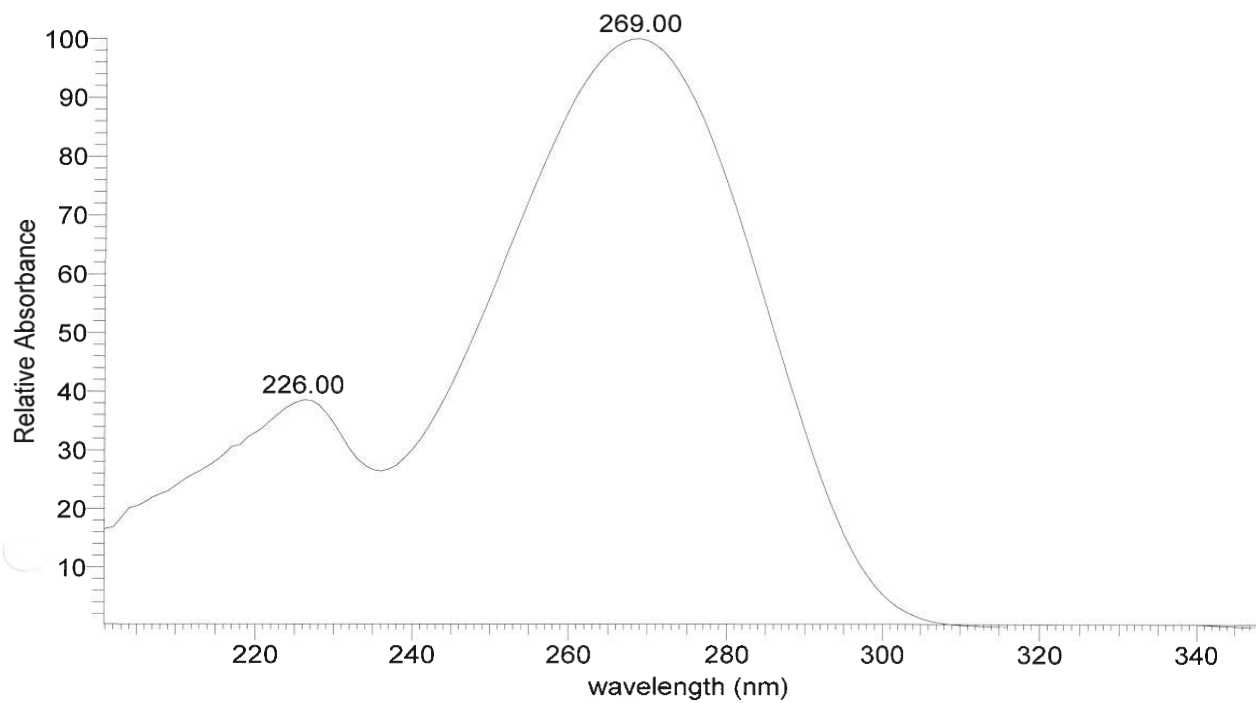



# Quad-22mer-5hmU

D:\Linda\...L-1051\_220401142442

4/1/2022 2:24:42 PM

RT: 12.84 - 33.37

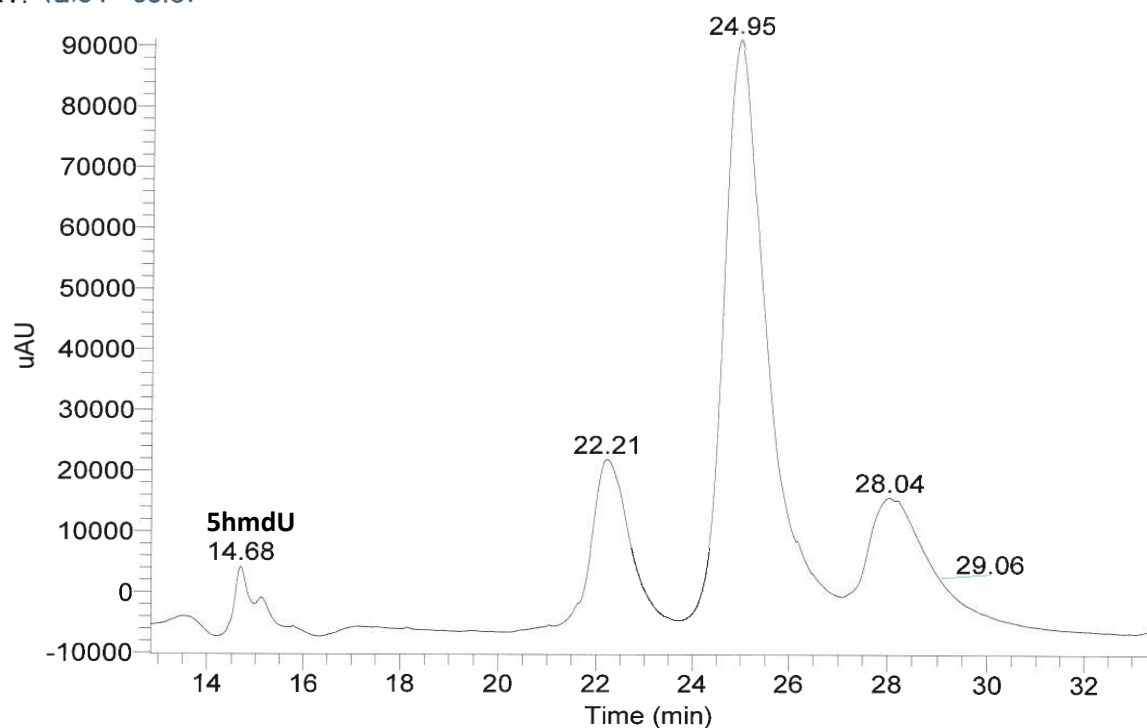

NL:  
9.10E4  
Total Scan  
PDA  
L-  
1051\_2204  
01142442

L-1051\_220401142442 #4403 RT: 14.67 AV: 1 NL: 5.49E4 microAU

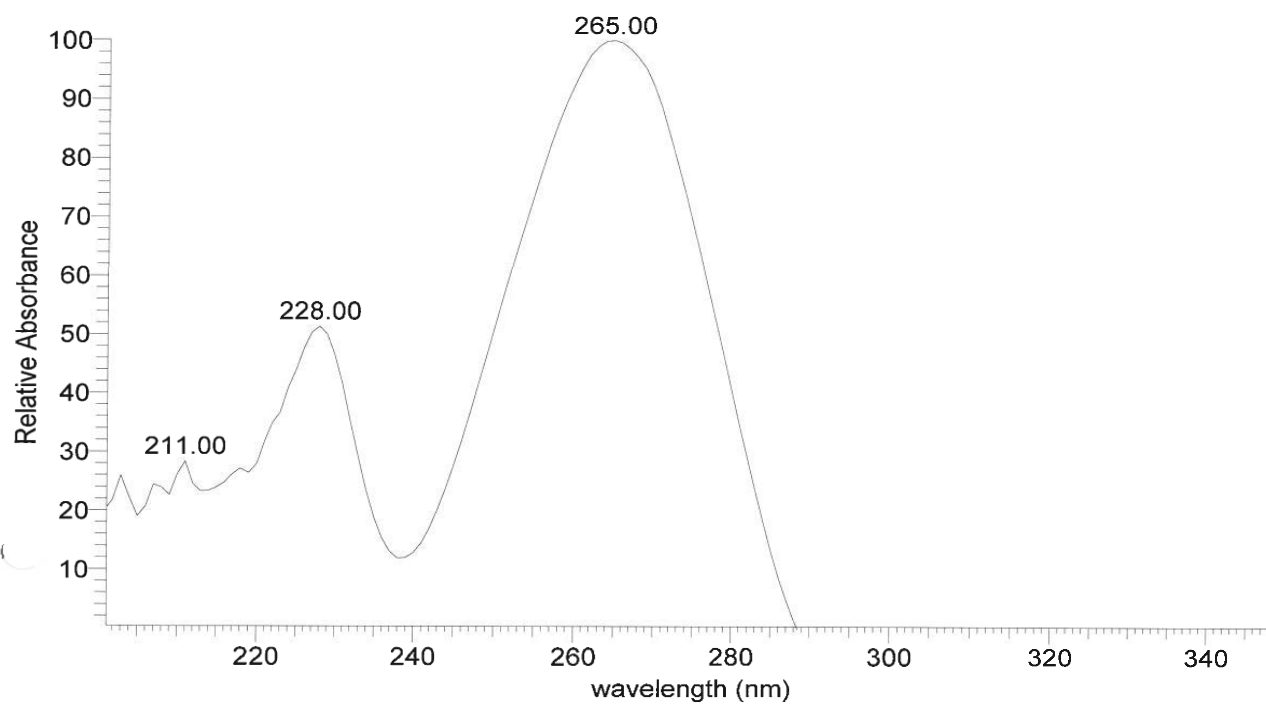

# Quad-22mer-U-FAM

D:\Linda\Data\2022\_March\L-9113

3/31/2022 1:30:56 PM

RT: 9.28 - 30.07

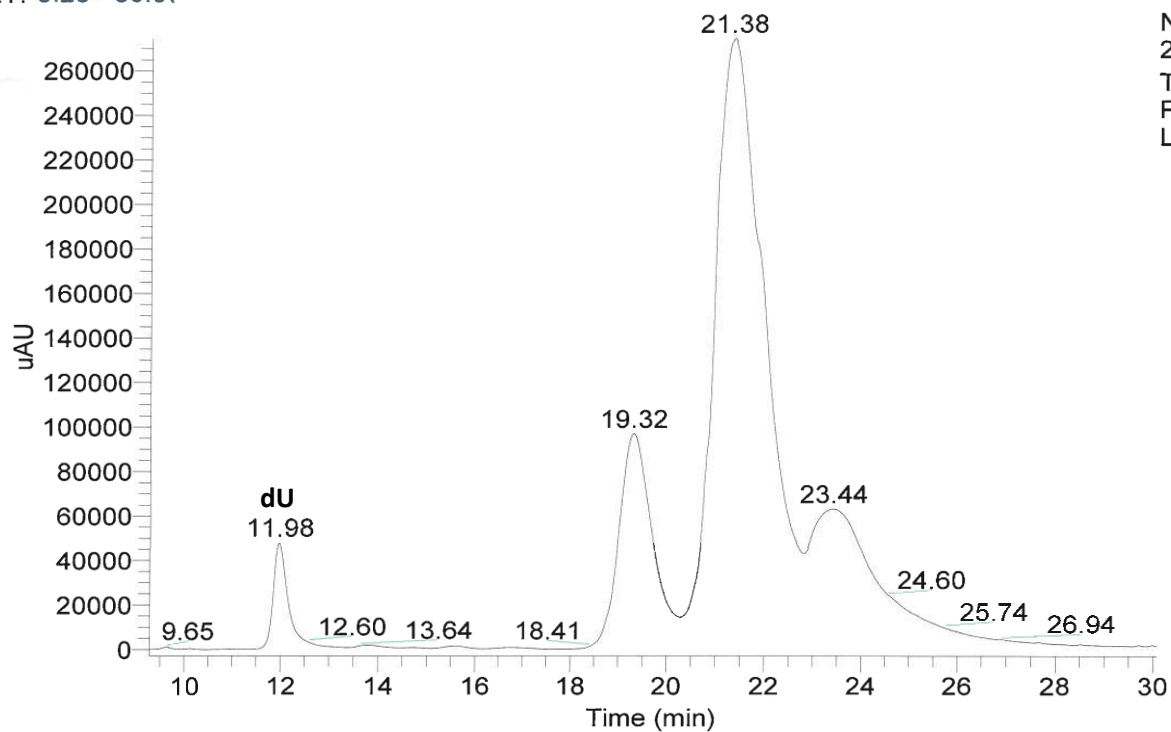

NL:  
2.75E5  
Total Scan  
PDA  
L-9113

L-9113 #3591 RT: 11.97 AV: 1 NL: 3.81E5 microAU

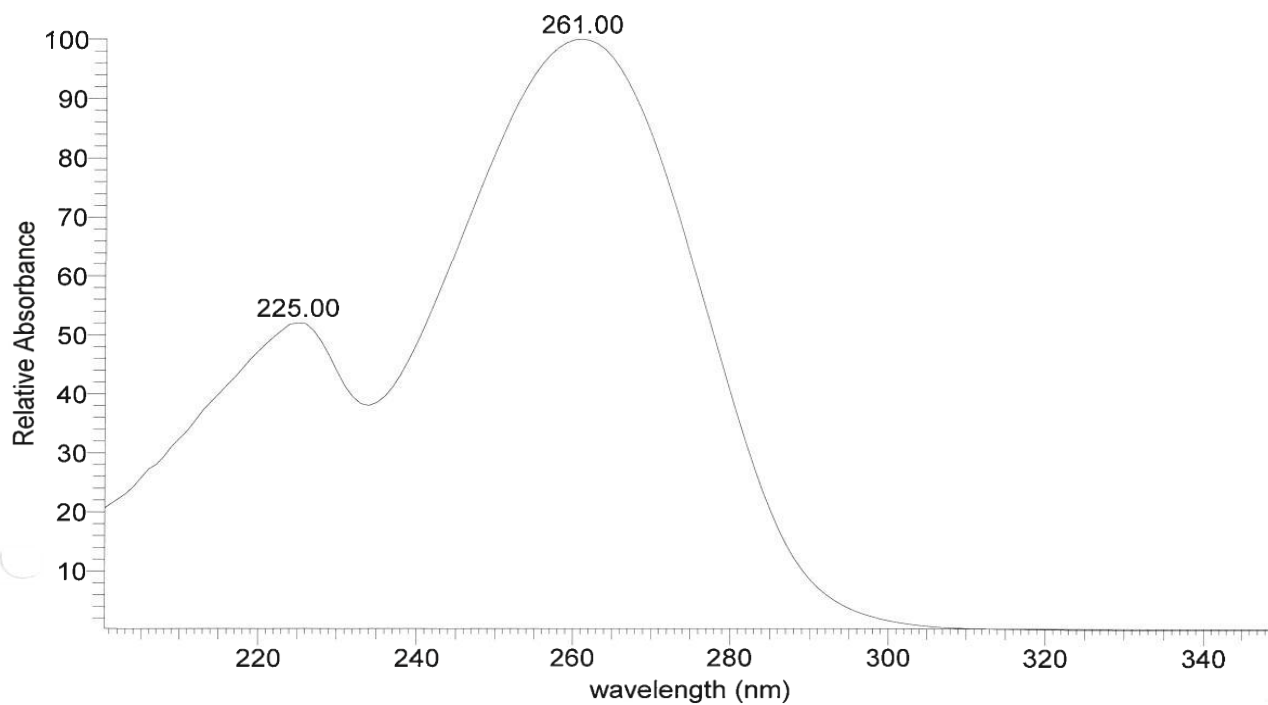

# Quad-22mer-5FU-FAM

D:\Linda\Data\2022\_April\L-1011

4/4/2022 12:06:17 PM

RT: 15.84 - 40.03

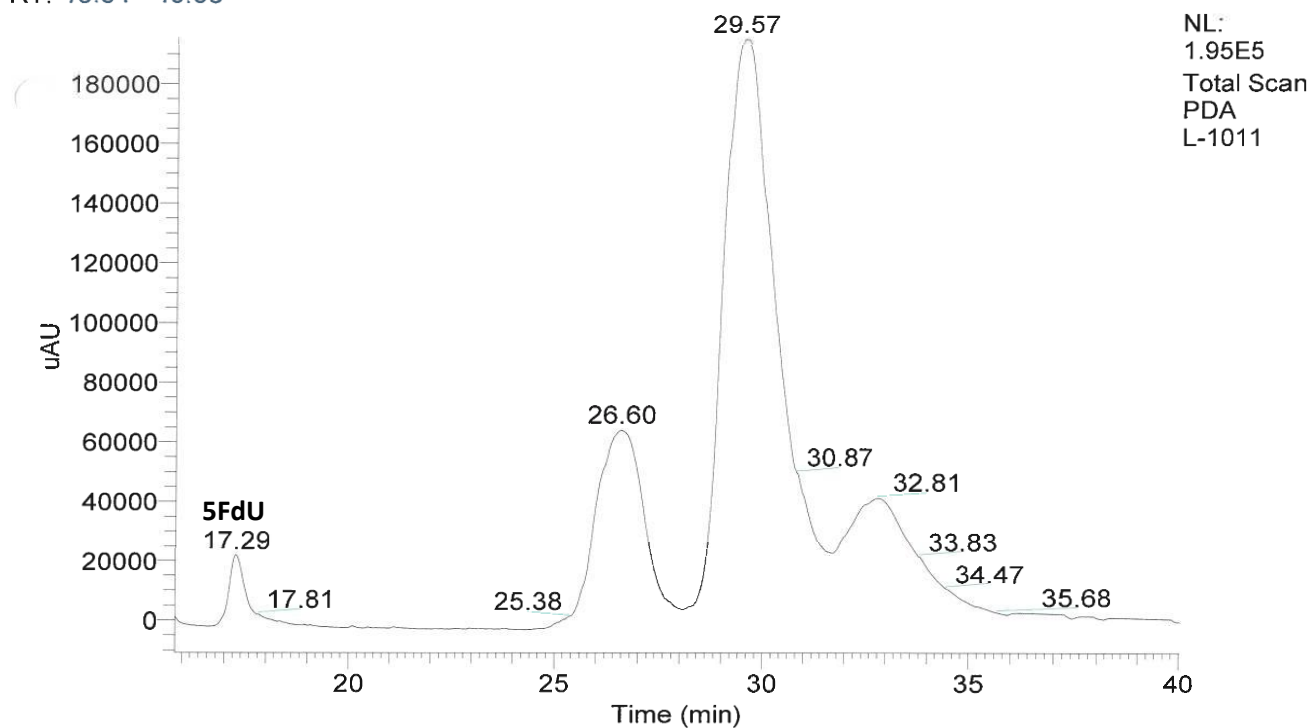

L-1011 #5170 RT: 17.23 AV: 1 NL: 1.85E5 microAU

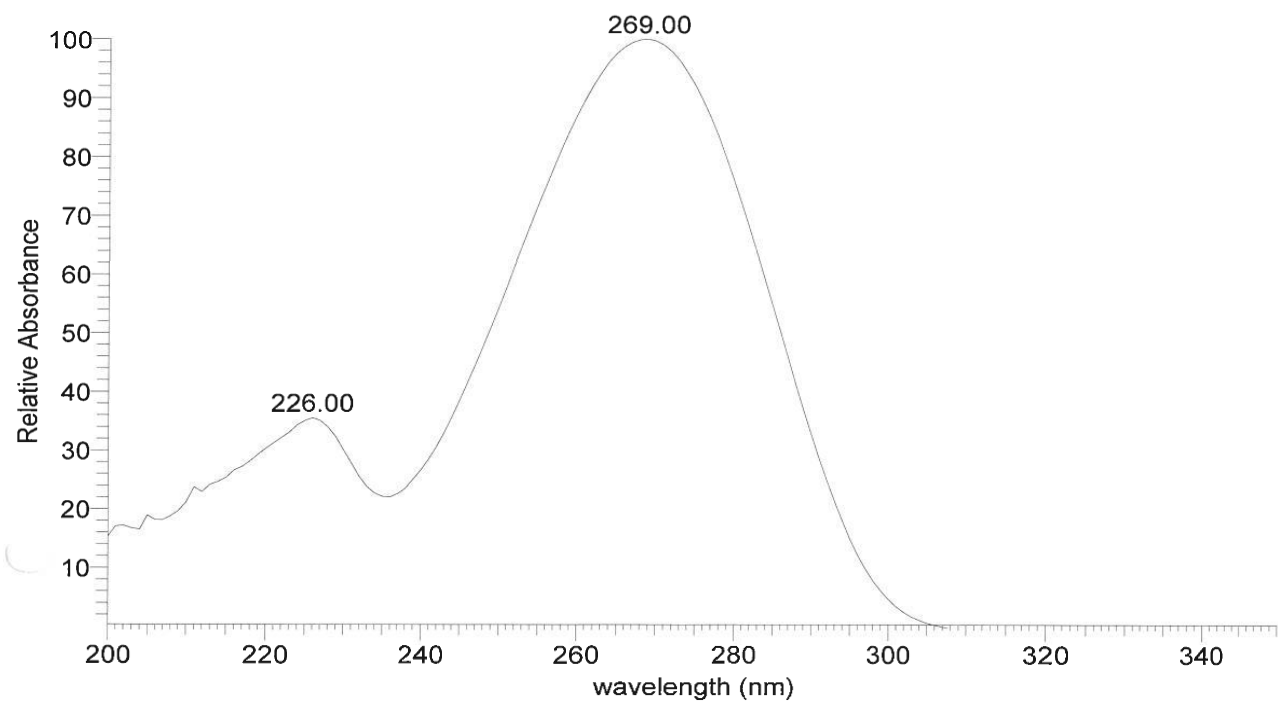

# Quad-22mer-5hmU-FAM

D:\Linda\...L-1041\_220401133628

4/1/2022 1:36:28 PM

RT: 11.14 - 30.23

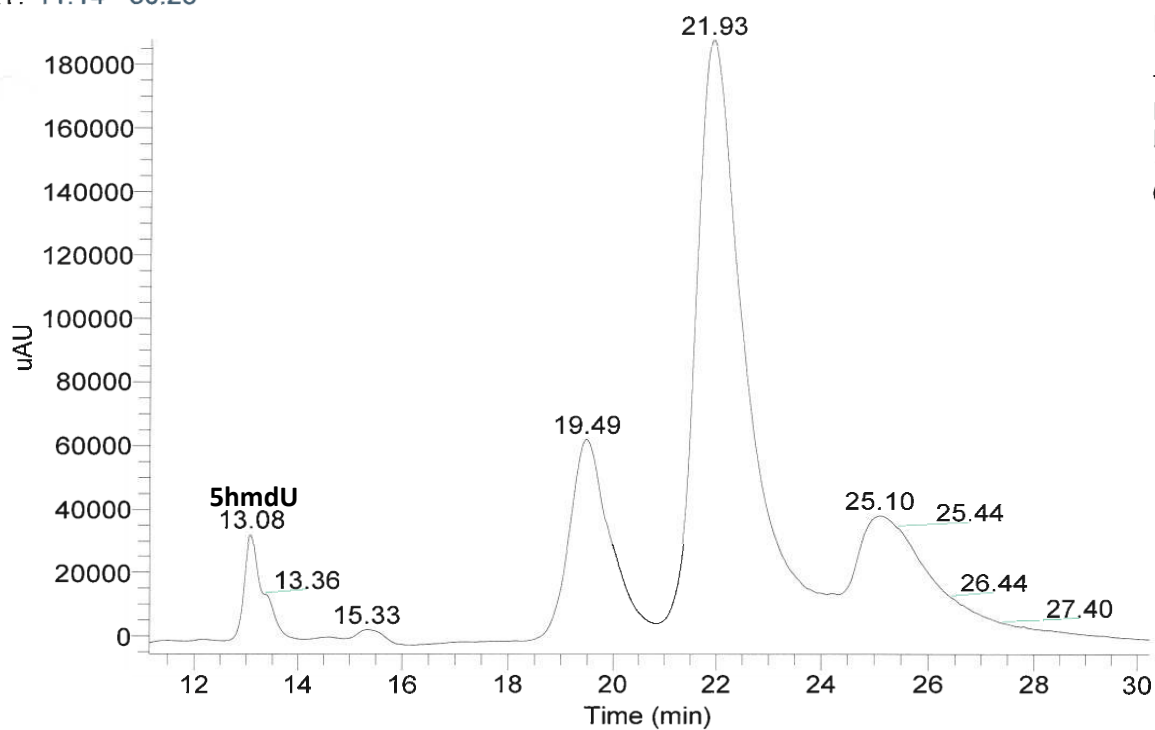

NL:  
1.88E5  
Total Scan  
PDA  
L-  
1041\_2204  
01133628

L-1041\_220401133628 #3928 RT: 13.09 AV: 1 NL: 2.66E5 microAU

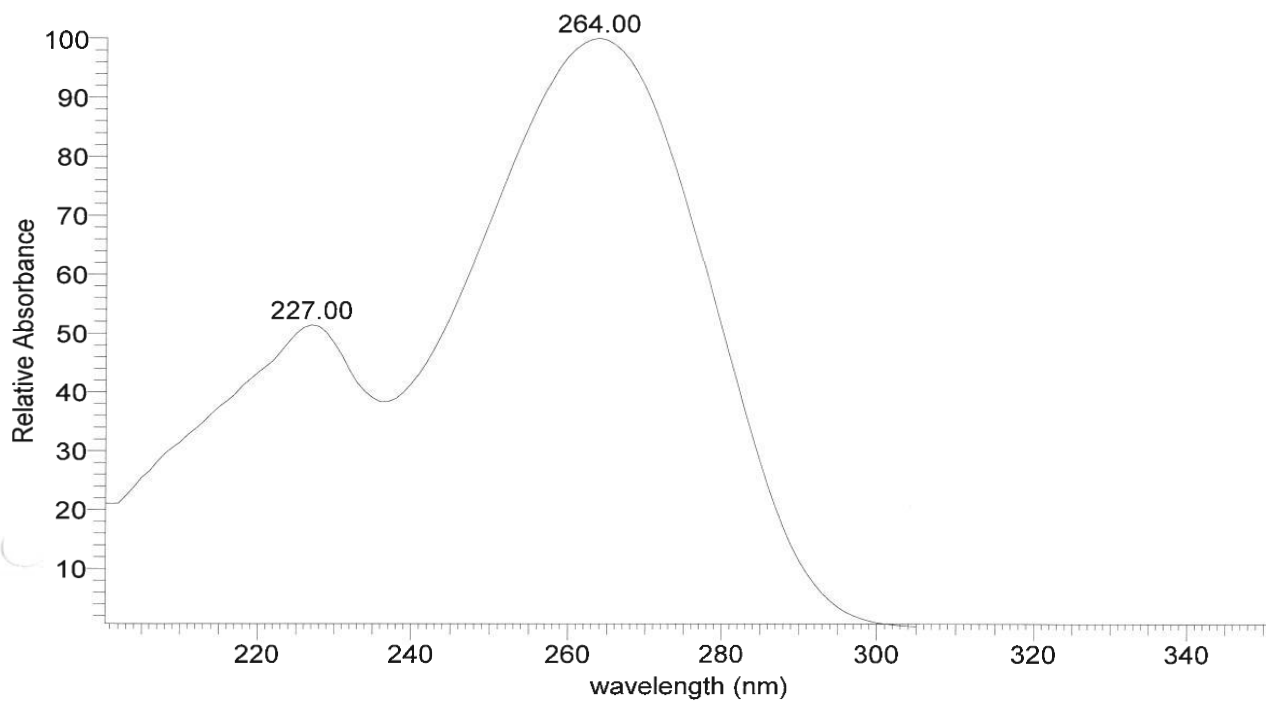

# Quad-22mer-U-FAM-BHQ1

D:\Linda\Data\2022\_March\L-9118

3/31/2022 2:18:49 PM

RT: 10.21 - 30.85

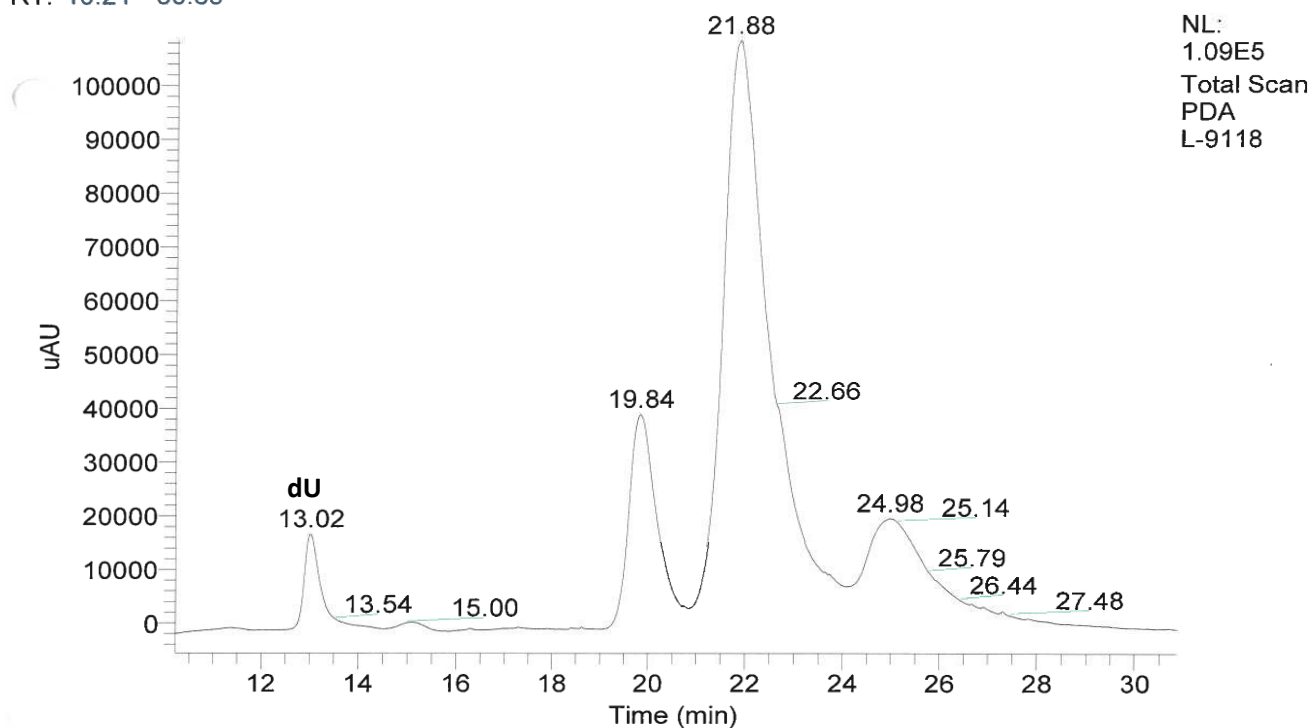

L-9118 #3900 RT: 13.00 AV: 1 NL: 1.44E5 microAU

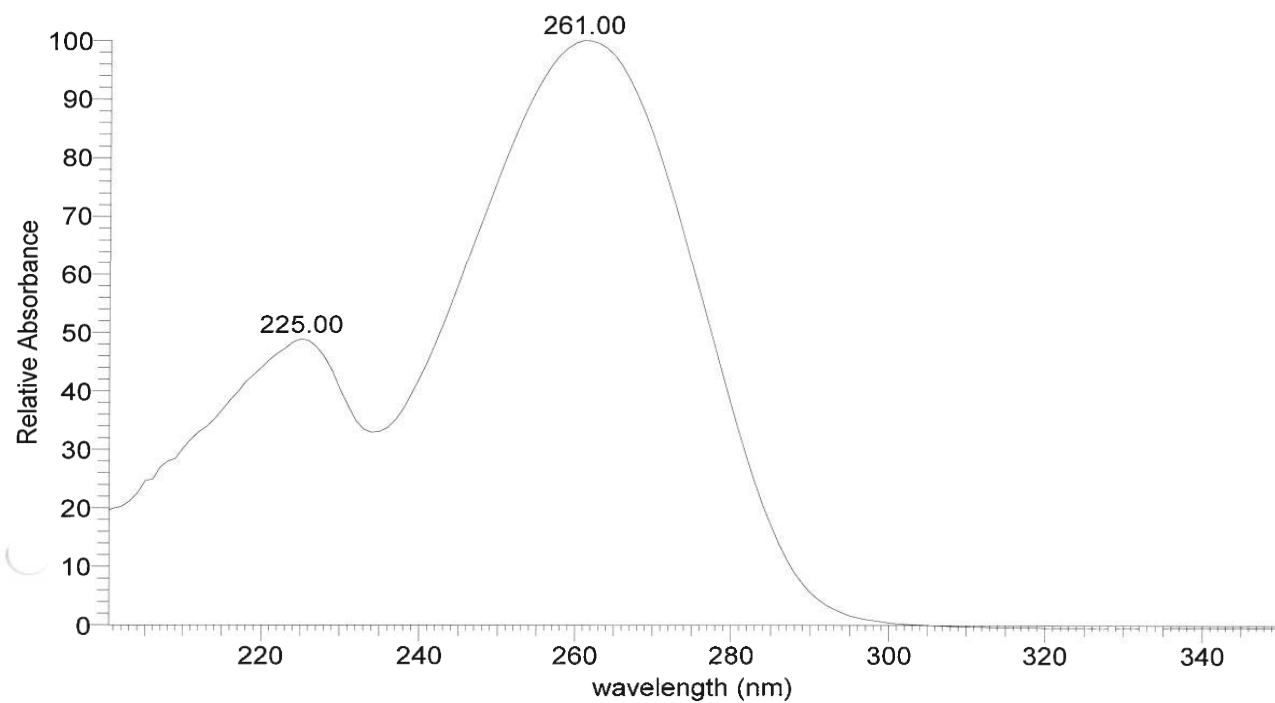

# Quad-22mer-5FU-FAM-BHQ1

D:\Linda\Data\2022\_April\L-1016

4/4/2022 12:52:48 PM

RT: 15.17 - 35.08

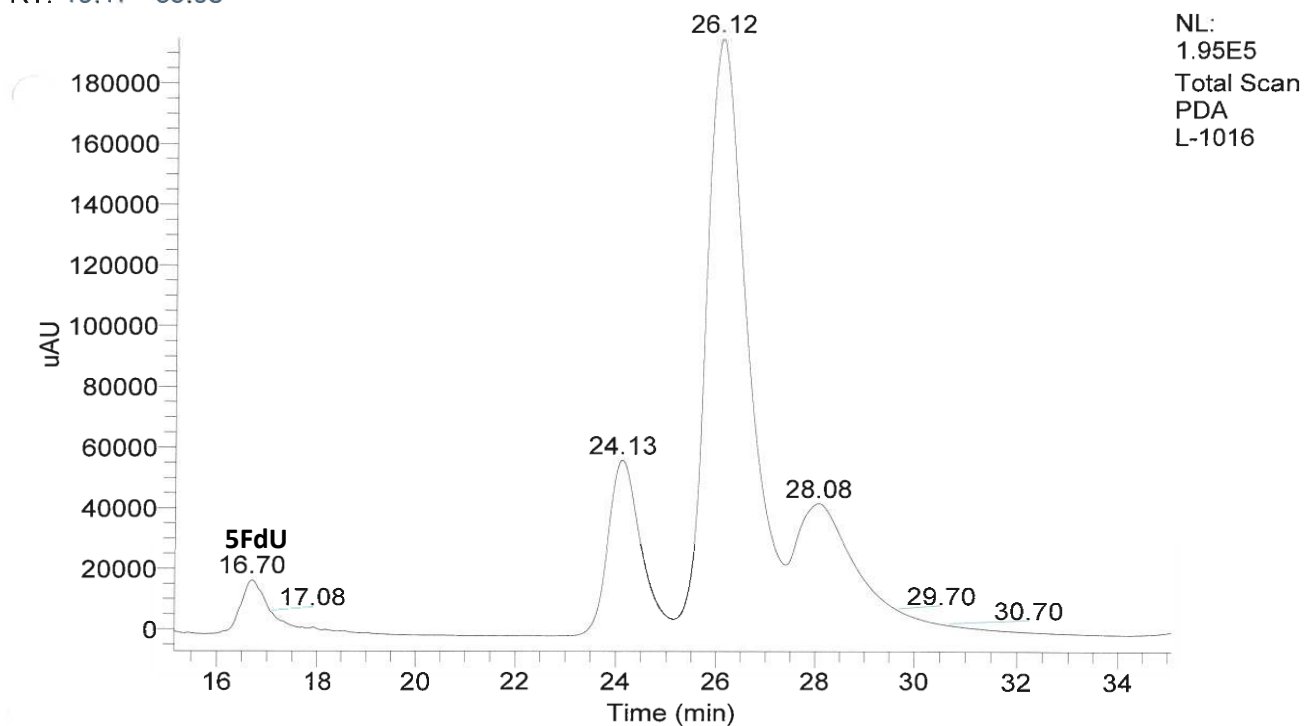

L-1016 #5006 RT: 16.68 AV: 1 NL: 1.41E5 microAU

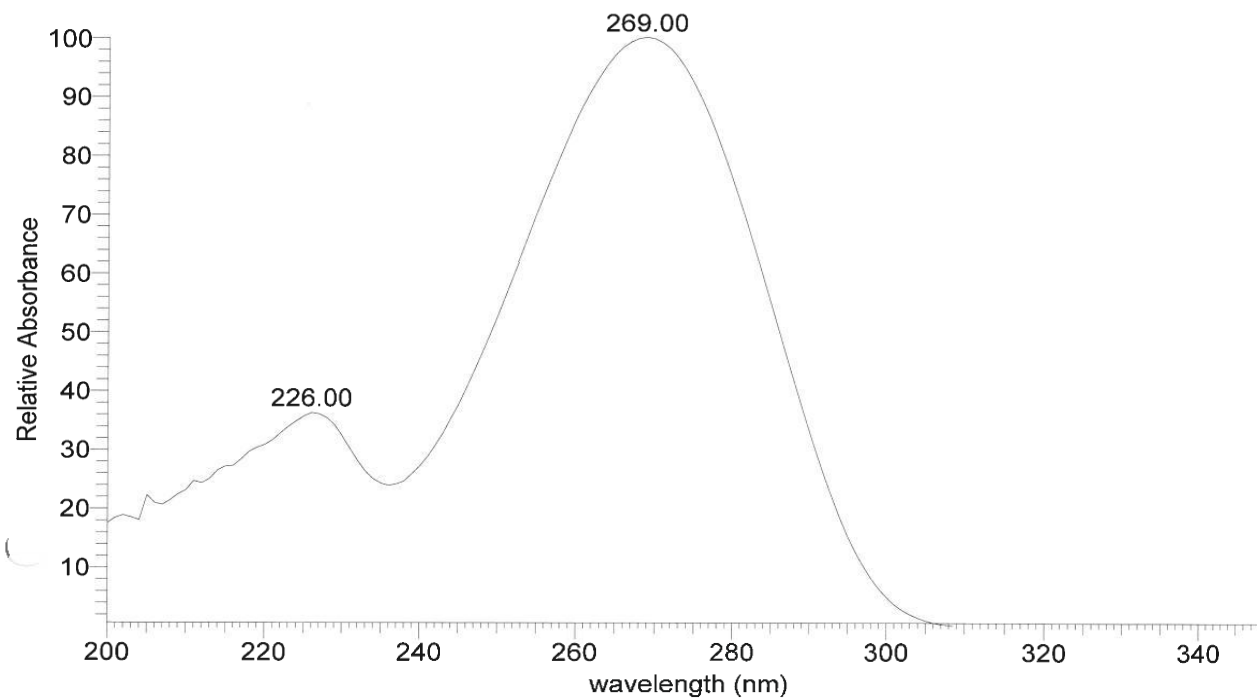

# Quad-22mer-5hmU-FAM-BHQ1

D:\Linda\Data\2022\_April\L-1046

4/1/2022 11:08:31 AM

RT: 13.98 - 35.28

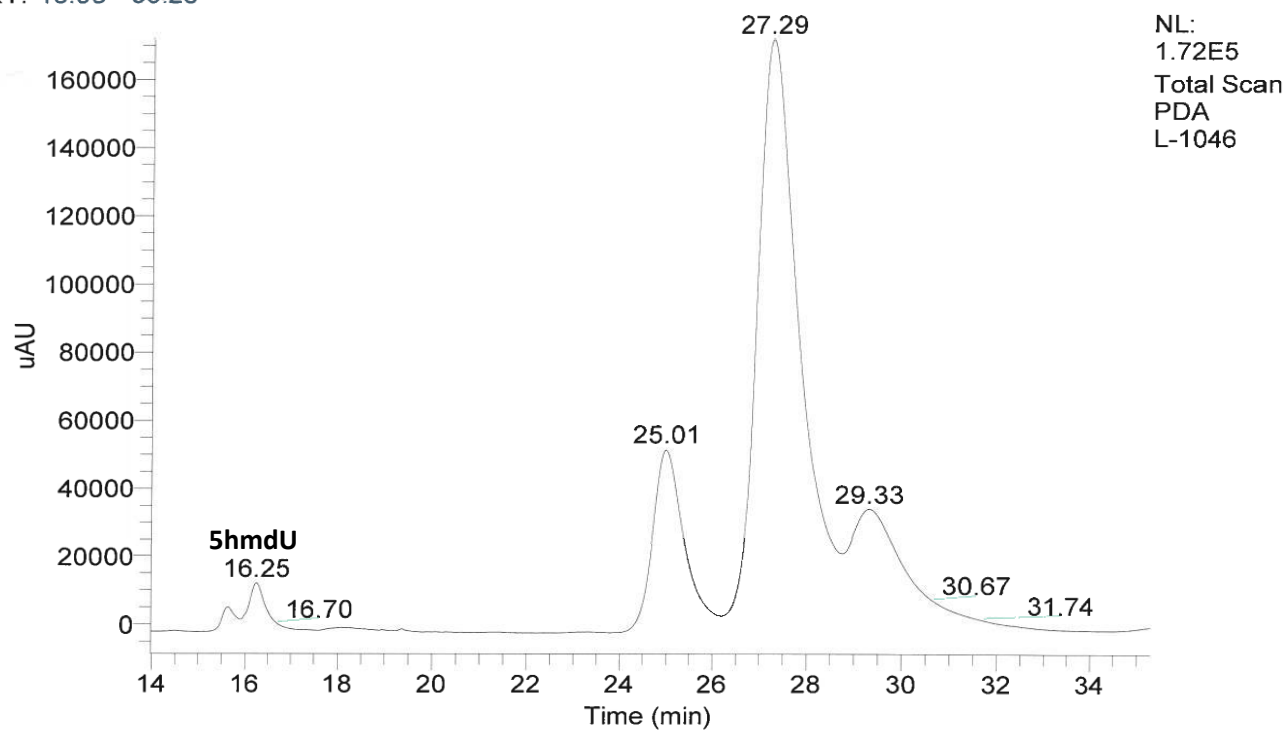

NL:  
1.72E5  
Total Scan  
PDA  
L-1046

L-1046 #4869 RT: 16.23 AV: 1 NL: 1.05E5 microAU

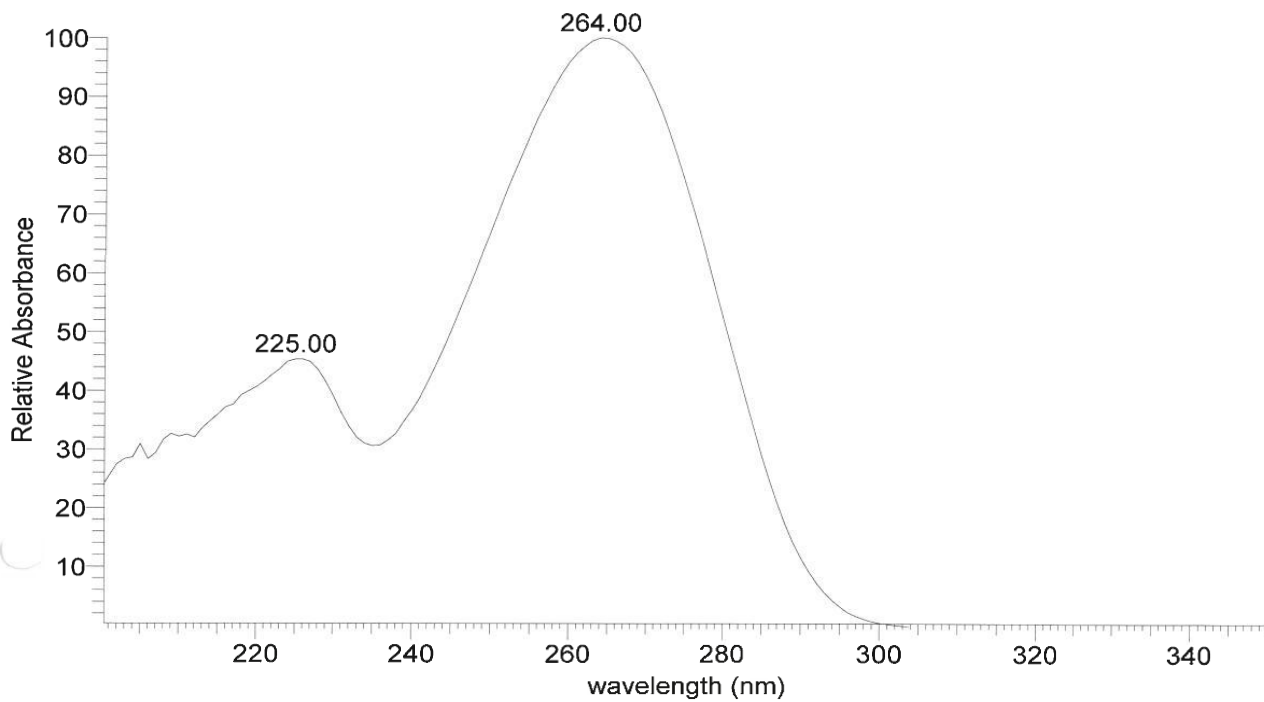

# Quad-22mer-U-Comp

D:\Linda\Data\2022\_March\L-9128

3/31/2022 3:56:42 PM

RT: 9.80 - 34.87

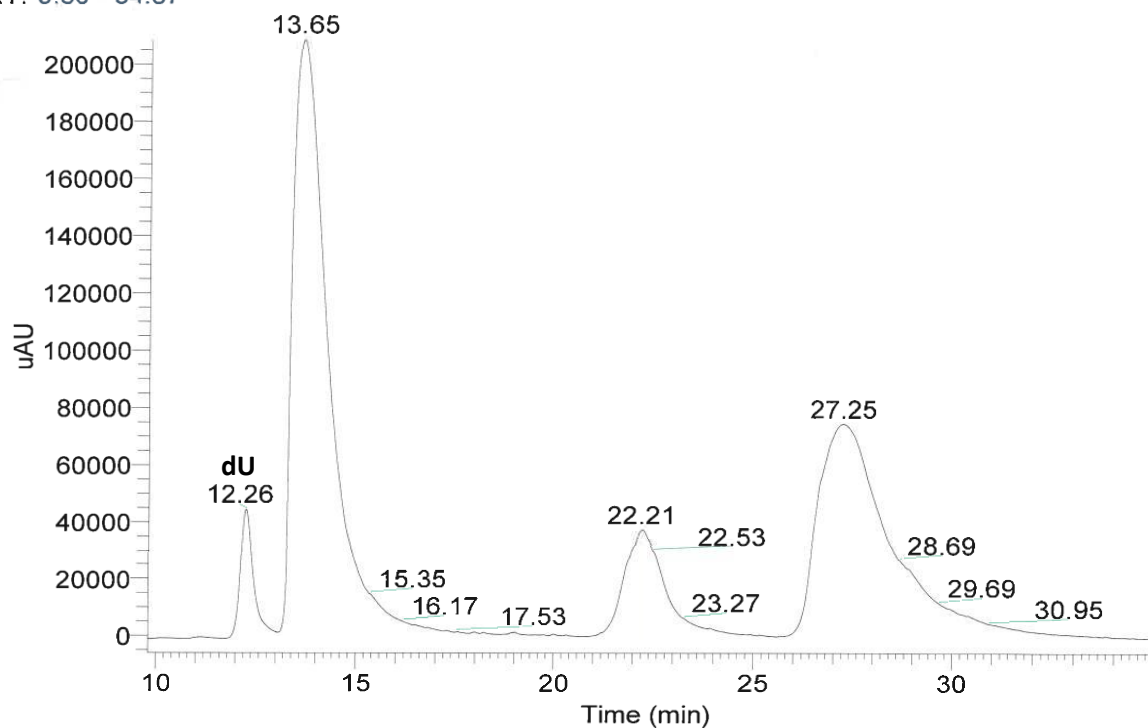

NL:  
2.09E5  
Total Scan  
PDA  
L-9128

L-9128 #3673 RT: 12.24 AV: 1 NL: 3.70E5 microAU

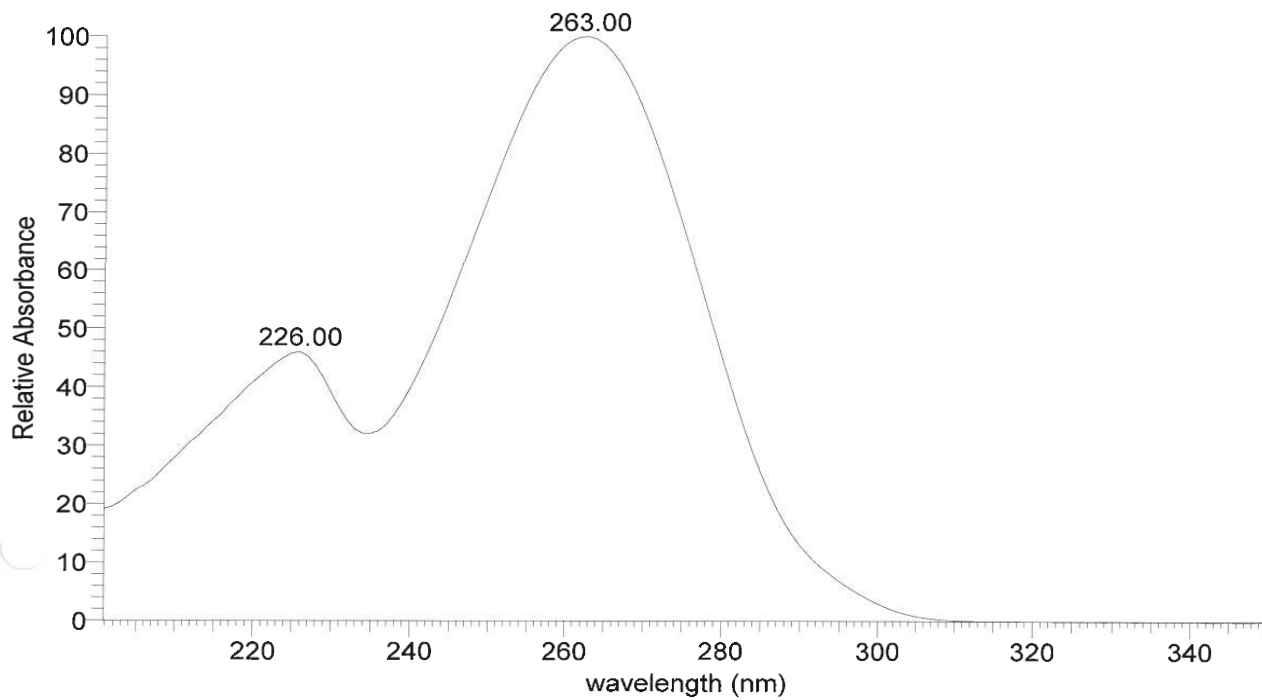



# Quad-22mer-U-Comp-Cy5

D:\Linda\...L-1131\_220427094628

4/27/2022 9:46:28 AM

RT: 5.07 - 25.01

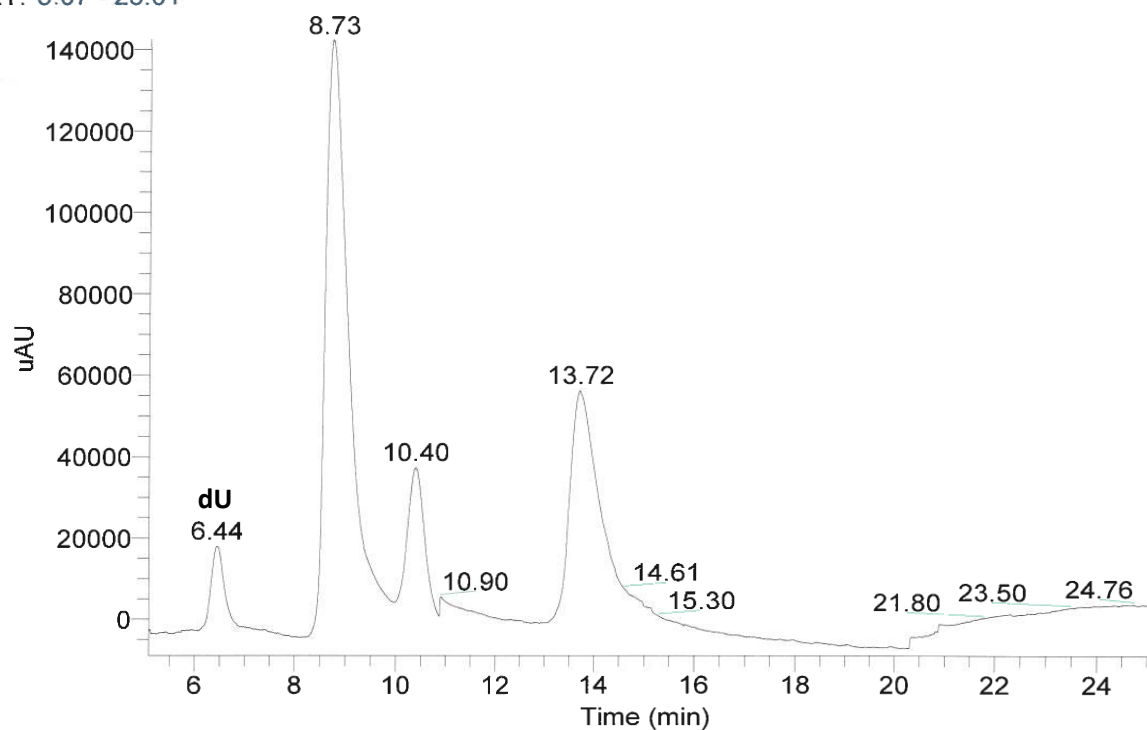

NL:  
1.42E5  
Total Scan  
PDA  
L-  
1131\_2204  
27094628

L-1131\_220427094628 #1930 RT: 6.43 AV: 1 NL: 1.73E5 microAU

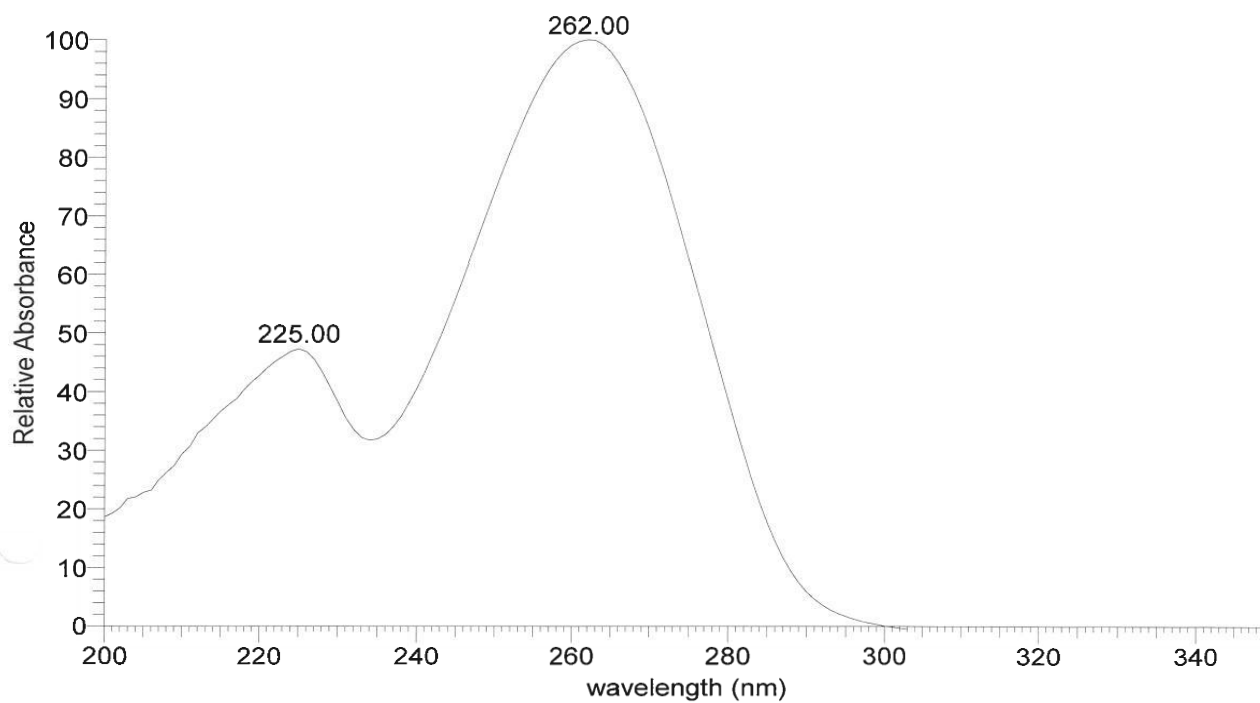

# 22mer-nonquad\_5hmU

D:\Linda\Data\2022\_April\L-1154

4/27/2022 4:45:02 PM

RT: 14.44 - 40.03

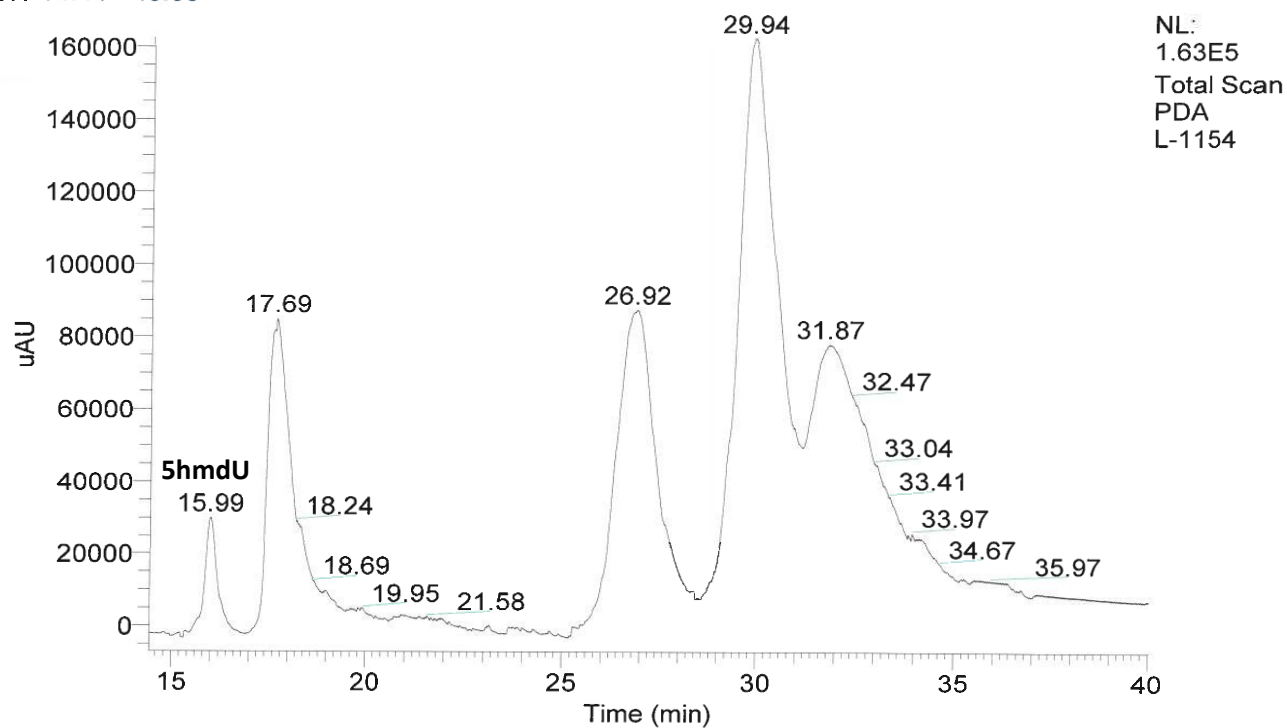

L-1154 #4793 RT: 15.97 AV: 1 NL: 2.74E5 microAU

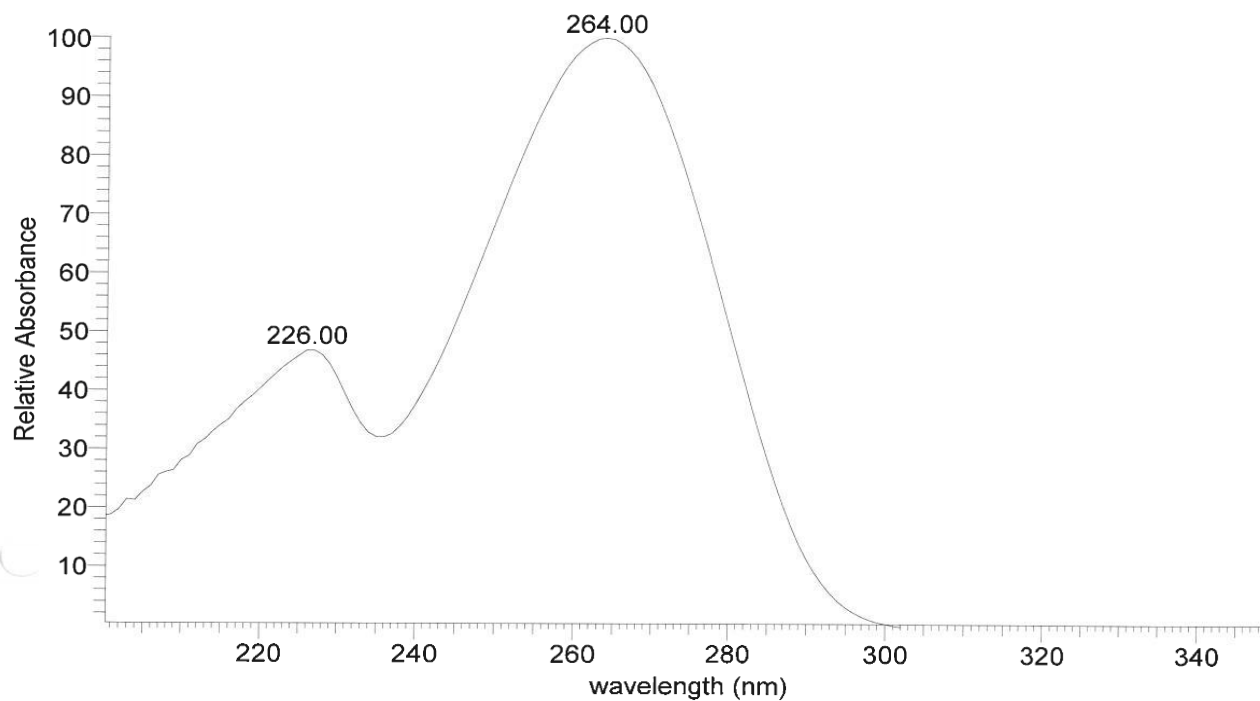

## 22mer-nonquad\_U

D:\Linda\Data\2022\_April\L-1121

4/26/2022 3:10:30 PM

RT: 5.44 - 25.03

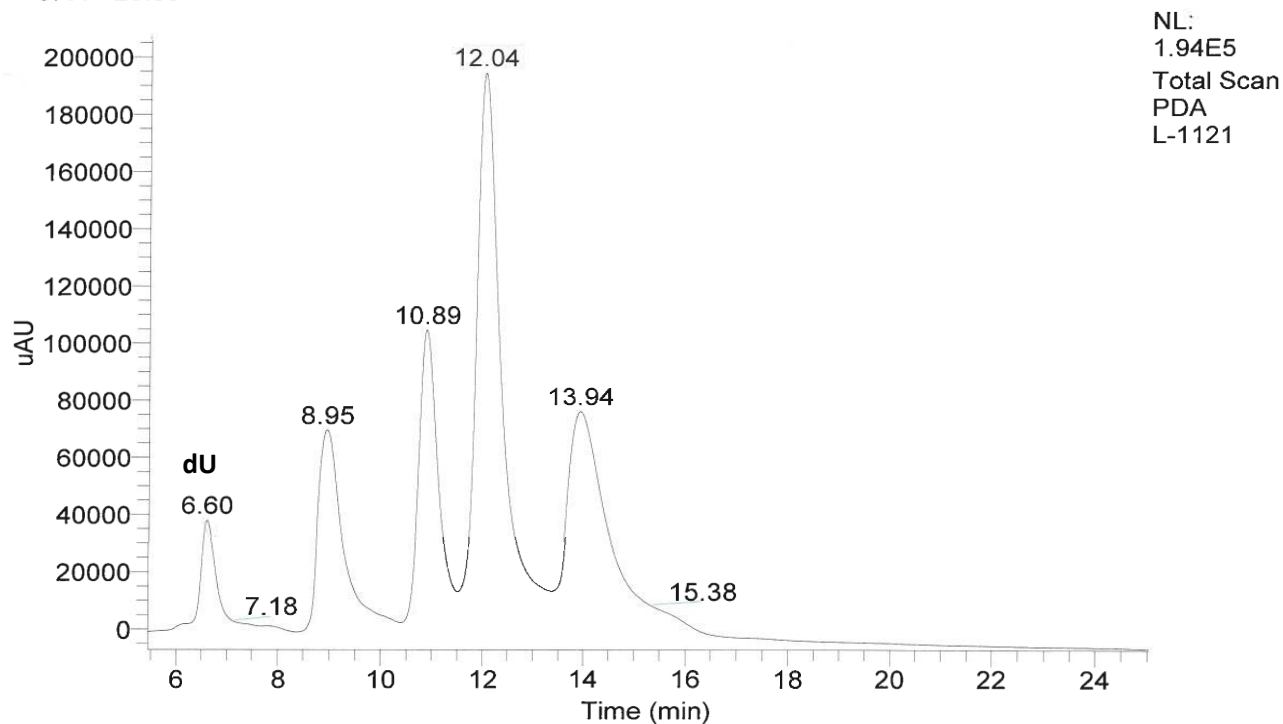

L-1121 #1978 RT: 6.59 AV: 1 NL: 3.28E5 microAU

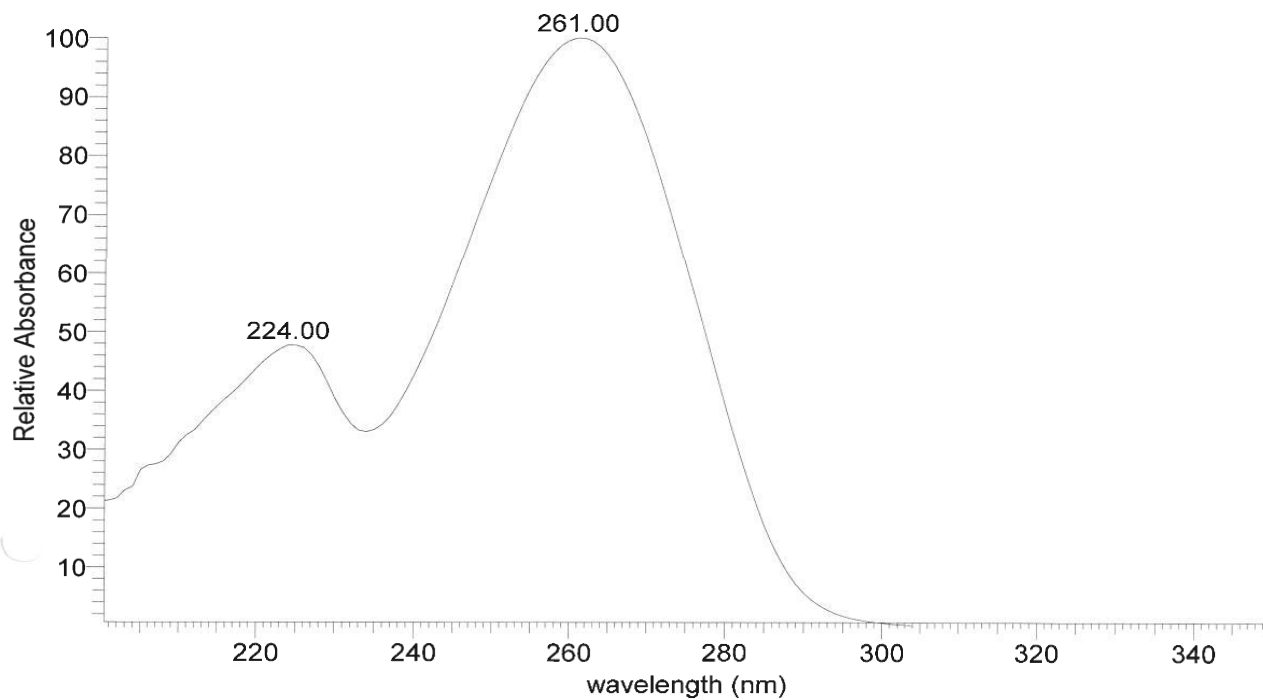

## H. GC/MS results for oligonucleotides and methods

**Table 5: Acid Hydrolysis and GC-MS Analysis of Oligonucleotides**

| Oligo                                 | Modified Base | Retention Time (min.) | Silylated Formula                                                              | Silylated Mass (amu) | M-57 Ion (amu) | Data File (D:\Maggie\Data\Linda) |
|---------------------------------------|---------------|-----------------------|--------------------------------------------------------------------------------|----------------------|----------------|----------------------------------|
| Quad-22mer-U                          | U             | 6.85                  | C <sub>16</sub> H <sub>32</sub> N <sub>2</sub> O <sub>2</sub> Si <sub>2</sub>  | 340                  | 283            | \03092022\L-9123_scan_01.D       |
| Quad-22mer-5FU                        | 5FU           | 6.79                  | C <sub>16</sub> H <sub>31</sub> FN <sub>2</sub> O <sub>2</sub> Si <sub>2</sub> | 358                  | 301            | \03092022\L-9143_scan_01.D       |
| Quad-22mer-5hmU <sup>1</sup>          | 5hmU          | 8.98                  | C <sub>23</sub> H <sub>48</sub> N <sub>2</sub> O <sub>3</sub> Si <sub>3</sub>  | 484                  | 427            | \03092022\L-1051_scan_01.D       |
| Quad-22mer-U-FAM                      | U             | 6.85                  | C <sub>16</sub> H <sub>32</sub> N <sub>2</sub> O <sub>2</sub> Si <sub>2</sub>  | 340                  | 283            | \03092022\L-9113_scan_01.D       |
| Quad-22mer-5FU-FAM                    | 5FU           | 6.79                  | C <sub>16</sub> H <sub>31</sub> FN <sub>2</sub> O <sub>2</sub> Si <sub>2</sub> | 358                  | 301            | \03092022\L-1011_scan_01.D       |
| Quad-22mer-5hmU-FAM <sup>1</sup>      | 5hmU          | 8.98                  | C <sub>23</sub> H <sub>48</sub> N <sub>2</sub> O <sub>3</sub> Si <sub>3</sub>  | 484                  | 427            | \03092022\L-1041_scan_01.D       |
| Quad-22mer-U-FAM-BHQ1                 | U             | 6.85                  | C <sub>16</sub> H <sub>32</sub> N <sub>2</sub> O <sub>2</sub> Si <sub>2</sub>  | 340                  | 283            | \03092022\L-9118_scan_01.D       |
| Quad-22mer-5FU-FAM-BHQ1               | 5FU           | 6.79                  | C <sub>16</sub> H <sub>31</sub> FN <sub>2</sub> O <sub>2</sub> Si <sub>2</sub> | 358                  | 301            | \03222022\L-1016_scan_01.D       |
| Quad-22mer-5hmU-FAM-BHQ1 <sup>1</sup> | 5hmU          | 8.98                  | C <sub>23</sub> H <sub>48</sub> N <sub>2</sub> O <sub>3</sub> Si <sub>3</sub>  | 484                  | 427            | \03092022\L-1046_scan_01.D       |
| Quad-22mer-U-Comp                     | U             | 6.85                  | C <sub>16</sub> H <sub>32</sub> N <sub>2</sub> O <sub>2</sub> Si <sub>2</sub>  | 340                  | 283            | \03092022\L-9128_scan_01.D       |
| Quad-22mer-U-Comp-Cy5                 | U             | 6.85                  | C <sub>16</sub> H <sub>32</sub> N <sub>2</sub> O <sub>2</sub> Si <sub>2</sub>  | 340                  | 283            | \04222022\L-1131_scan_01.D       |
| 22mer-nonquad_5hmU <sup>1</sup>       | 5hmU          | 8.98                  | C <sub>23</sub> H <sub>48</sub> N <sub>2</sub> O <sub>3</sub> Si <sub>3</sub>  | 484                  | 427            | \04222022\L-1154_scan_01.D       |
| 22mer-nonquad_U                       | U             | 6.85                  | C <sub>16</sub> H <sub>32</sub> N <sub>2</sub> O <sub>2</sub> Si <sub>2</sub>  | 340                  | 283            | \04222022\L-1121_scan_01.D       |

<sup>1</sup>Water step needed to remove formate ester formed in hydrolysis.

**GC/MS:** Formic acid hydrolysis was done on oligonucleotide (0.1 OD) with 88% formic acid (100 µL) at 140°C for 40 minutes in sealed GC vial. After cooling, the acid was removed under reduced pressure and the resulting bases were dissolved in anhydrous acetonitrile (20 µL) and N-(t-butyldimethylsilyl)-N-methyltrifluoroacetamide (MTBSTFA) with 1% tert-butyldimethylchlorosilane (TBDMCS) (20 µL) (ThermoFisher Scientific TS48927). The sealed vial was heated at 140°C for 40 minutes. The samples were cooled before being injected on an Agilent 7890A GC with Agilent J&W DB-5MS + DG column (30 m x 0.25 mm id, film thickness 0.25 µm) using helium carrier gas at 1 mL/min constant flow. The GC oven temperature was held at 100 °C for 2 minutes, ramped to 260 °C at 30 °C /minute then held for 10 minutes. The GC was directly coupled to an Agilent 5975C Mass Selective Detector with Triple-Axis detector. Each sample (0.5µL) was injected and run in SCAN mode.

**Water step:** Water (100 µL) was added after removing the formic acid and the sealed vial was heated at 140°C for 40 minutes then dried under reduced pressure. Derivatization was done as described above.

## I. GC/MS spectra of hydrolyzed and derivatized oligonucleotides

Quad-22mer-U

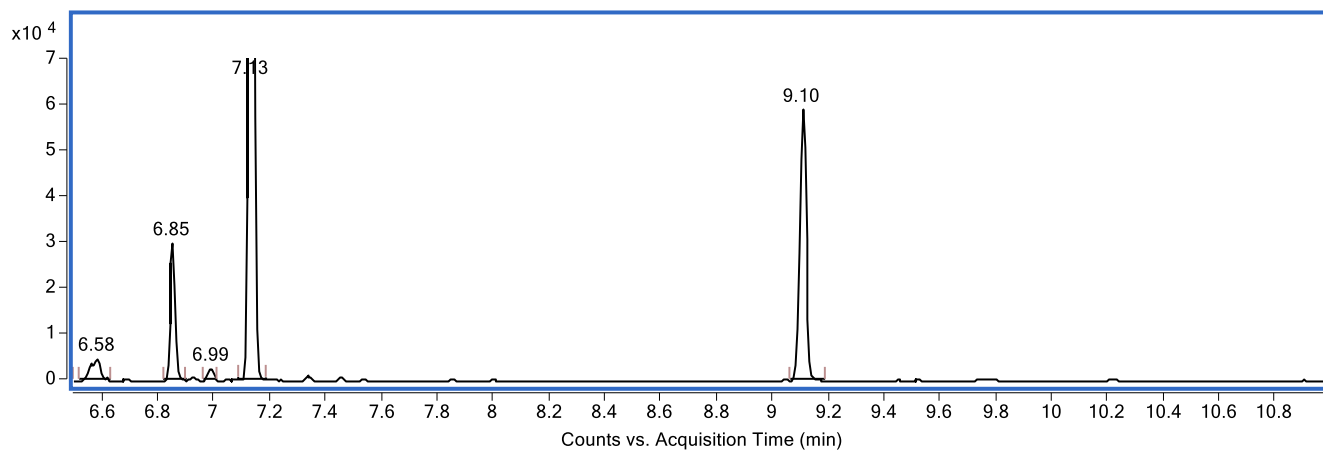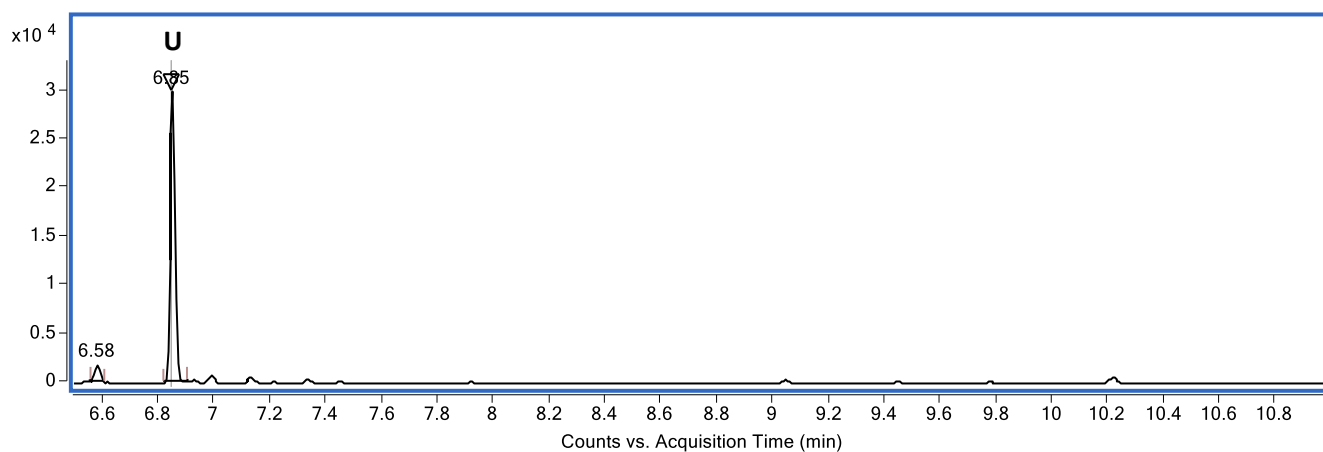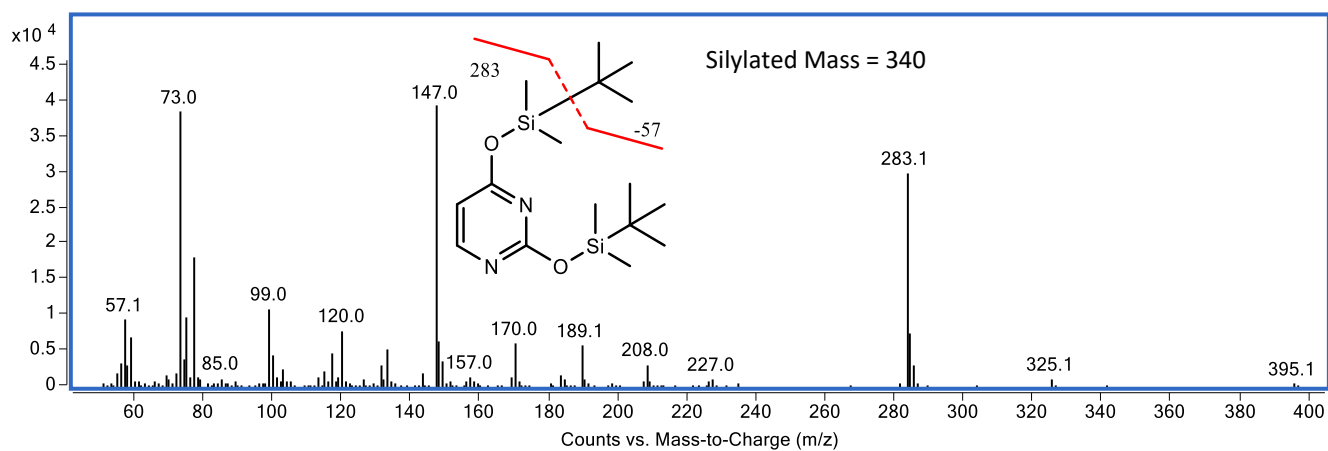

# Quad-22mer-5FU

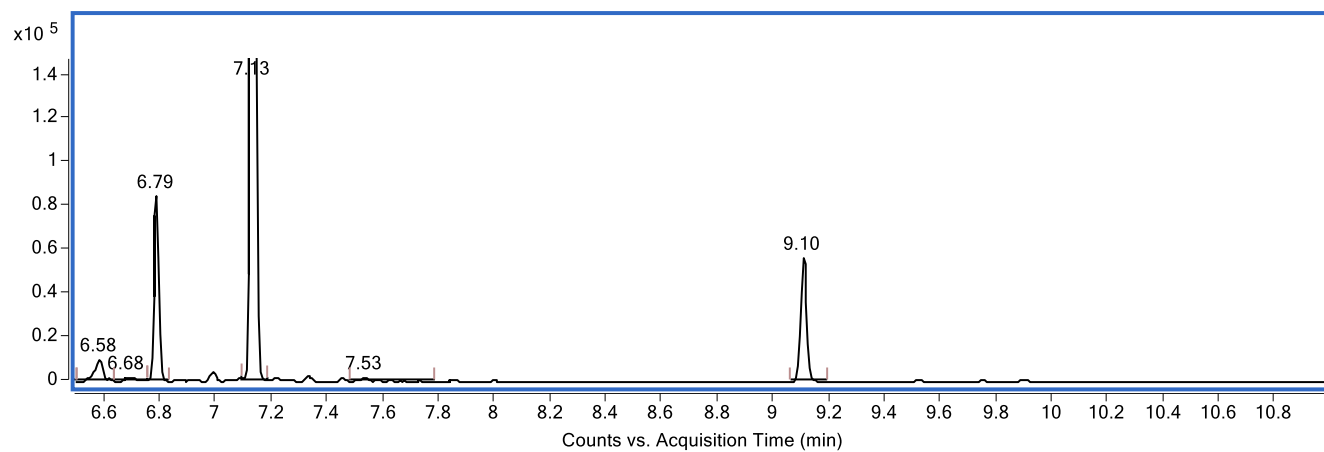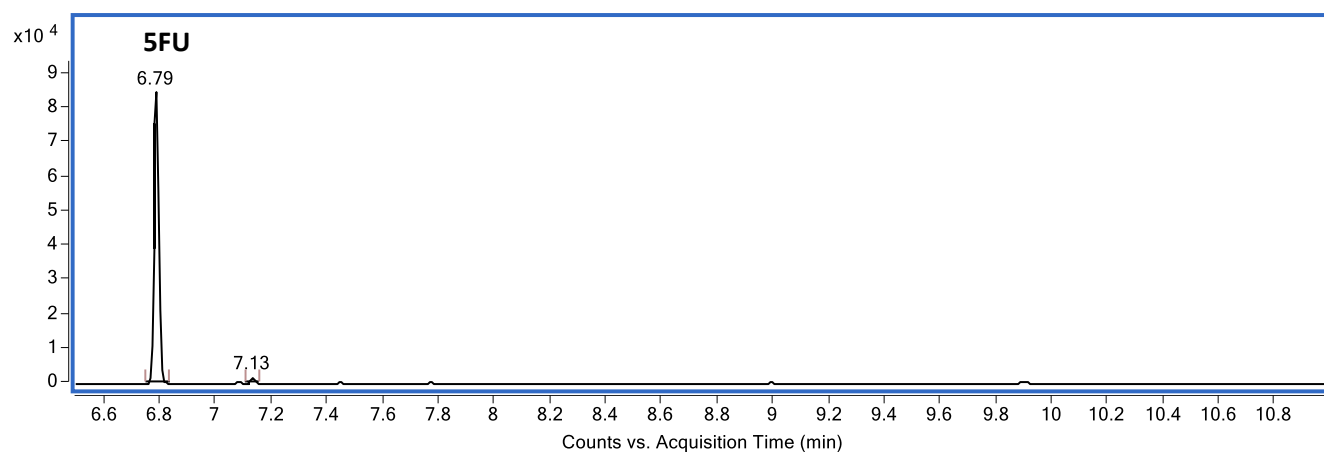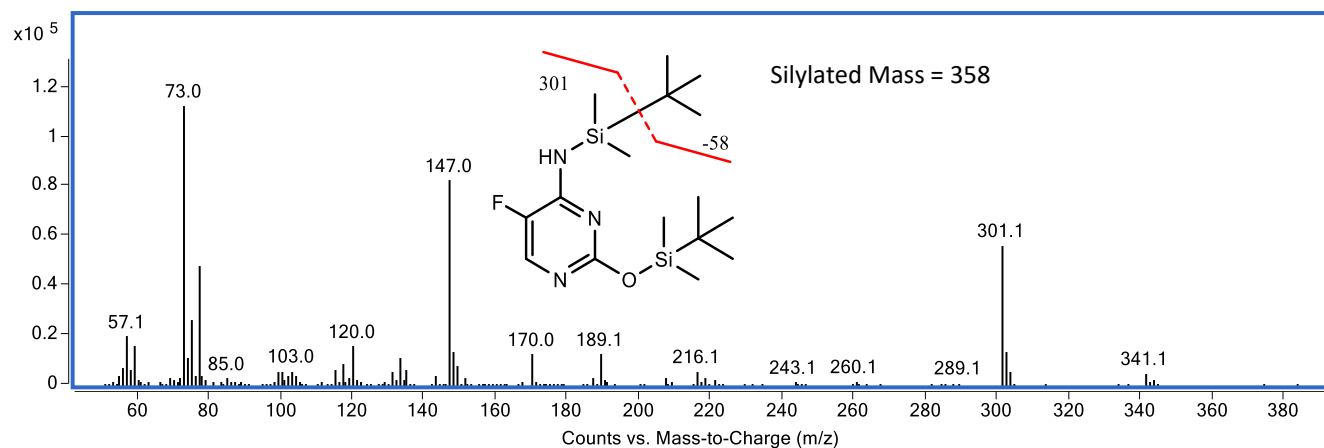

# Quad-22mer-5hmU

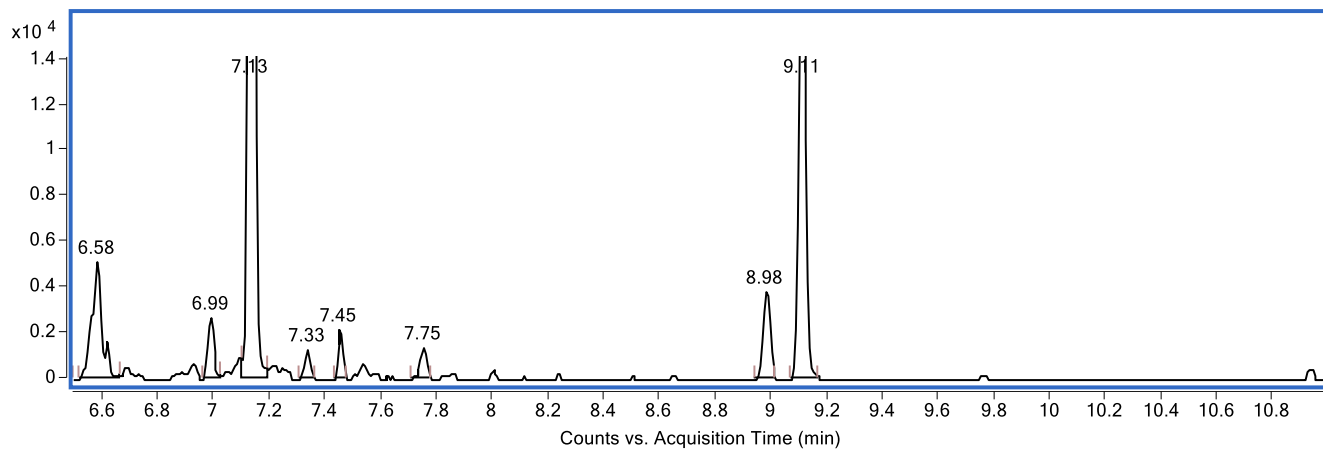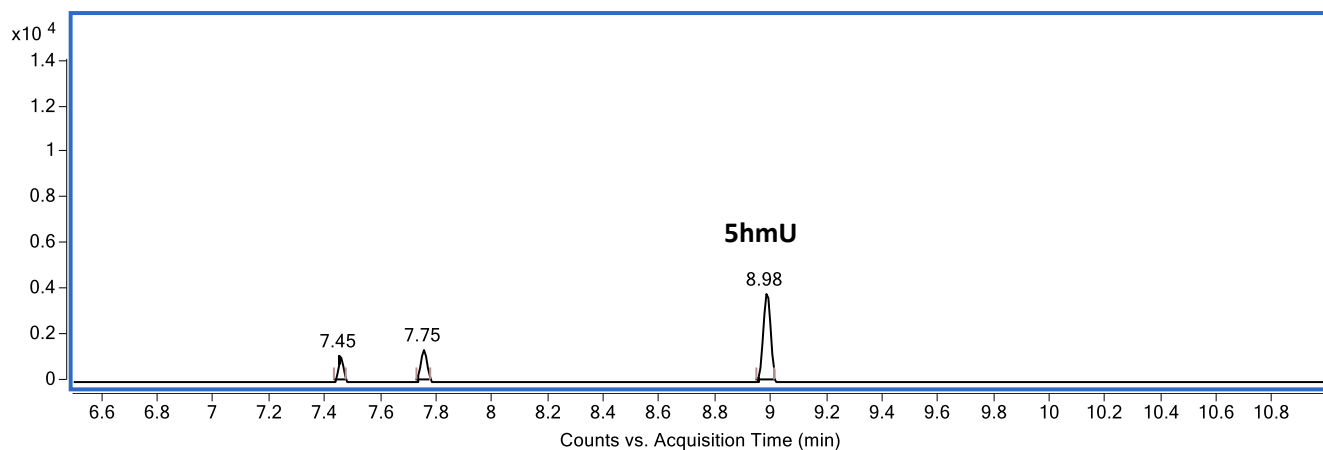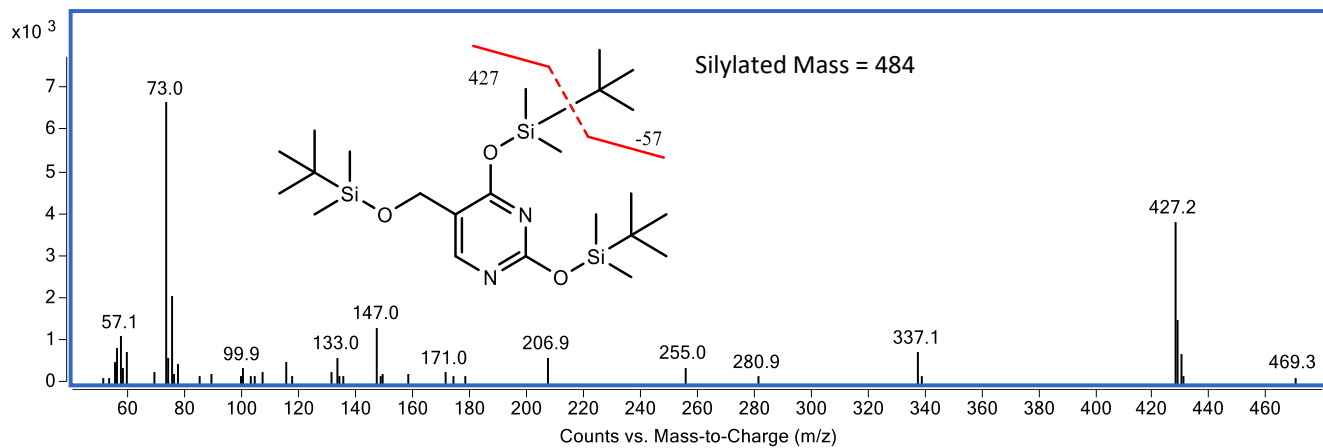

# Quad-22mer-U-FAM

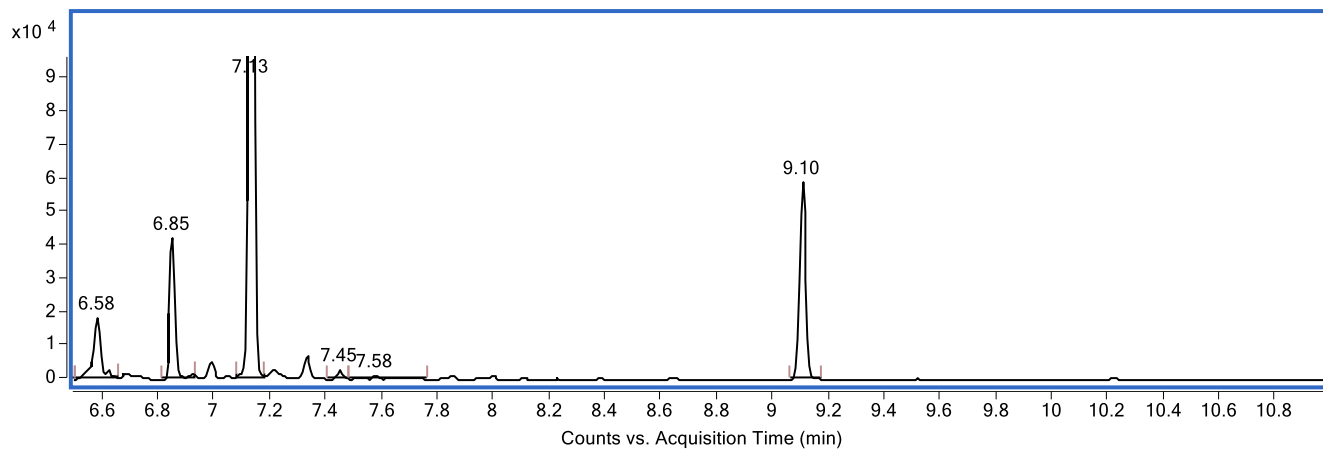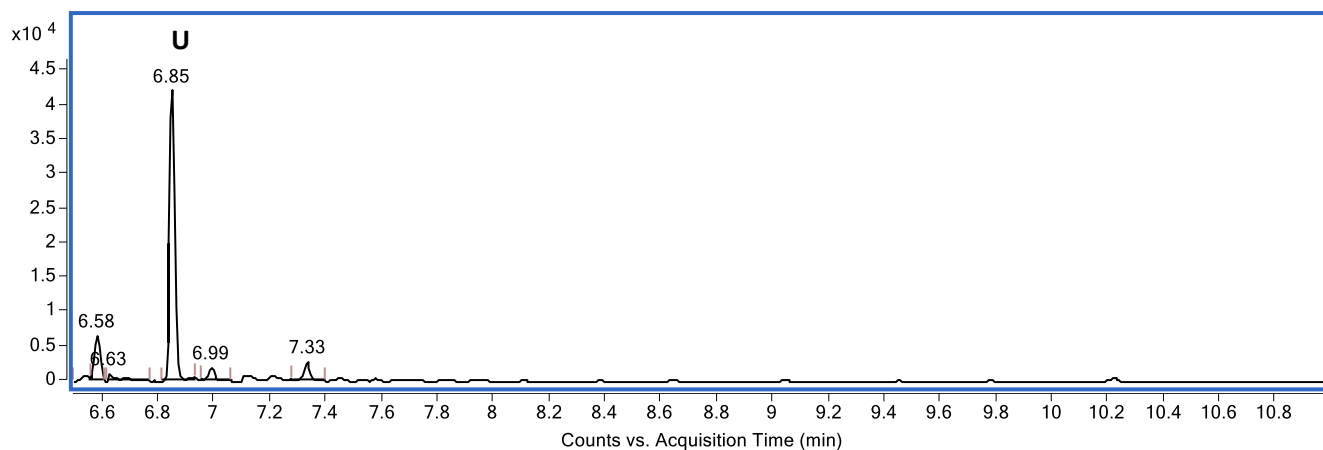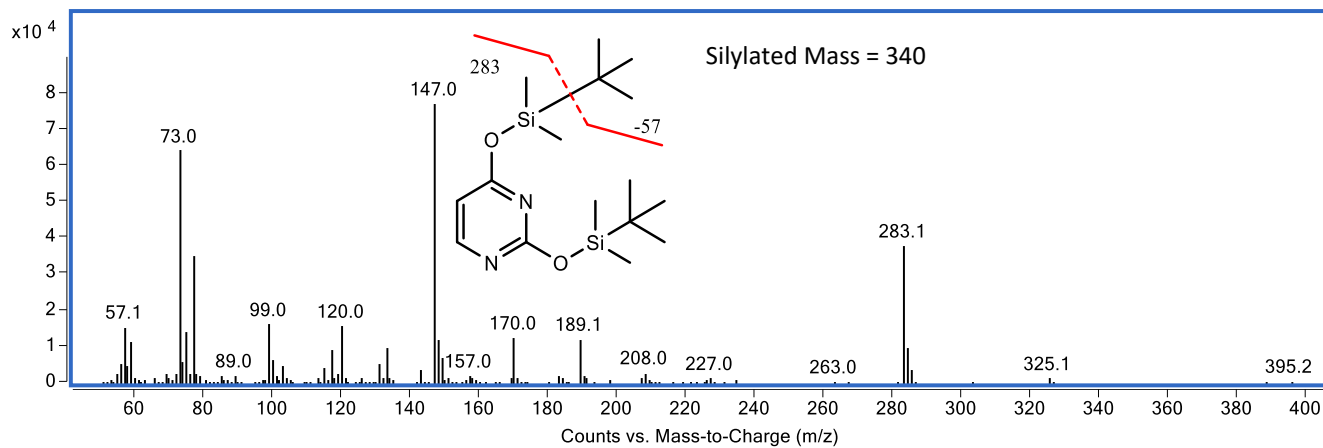



# Quad-22mer-5FU-FAM

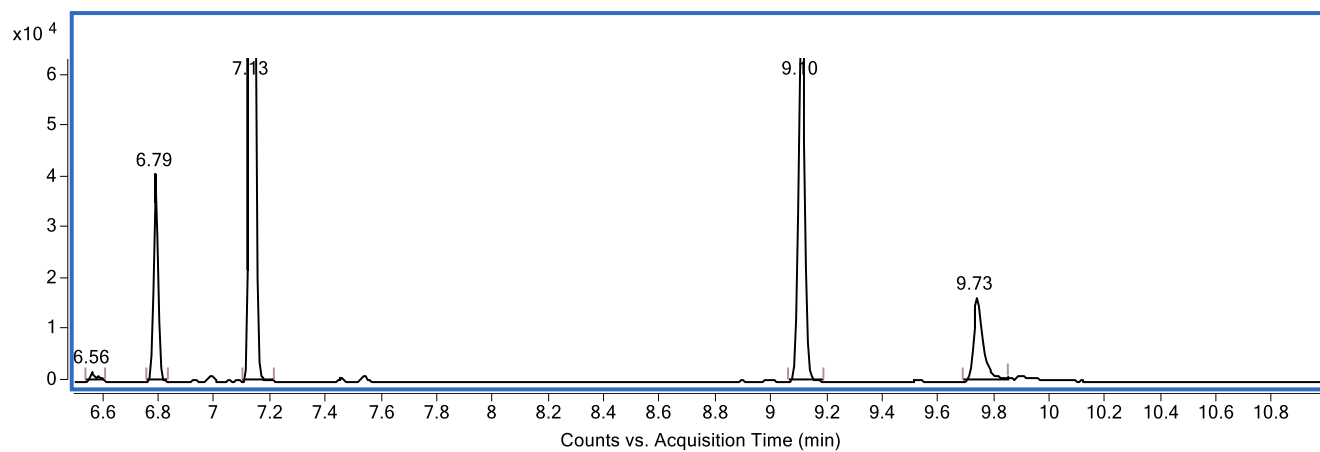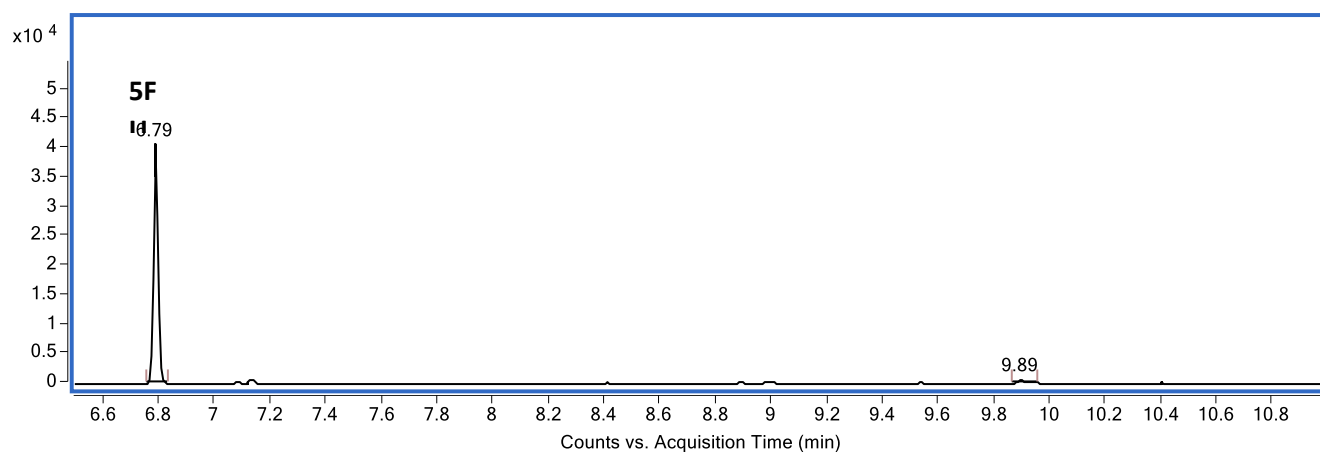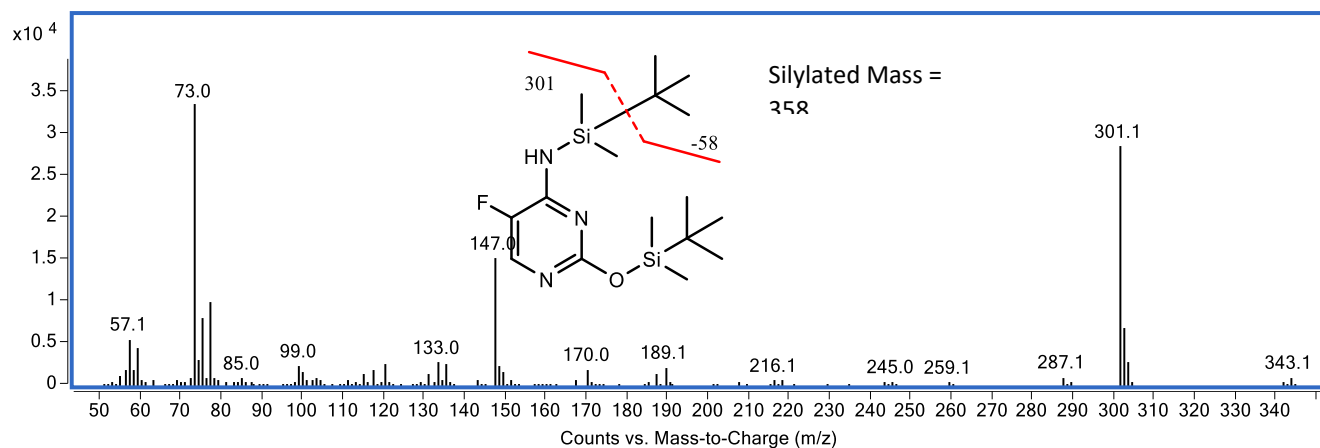

# Quad-22mer-5hmU-FAM

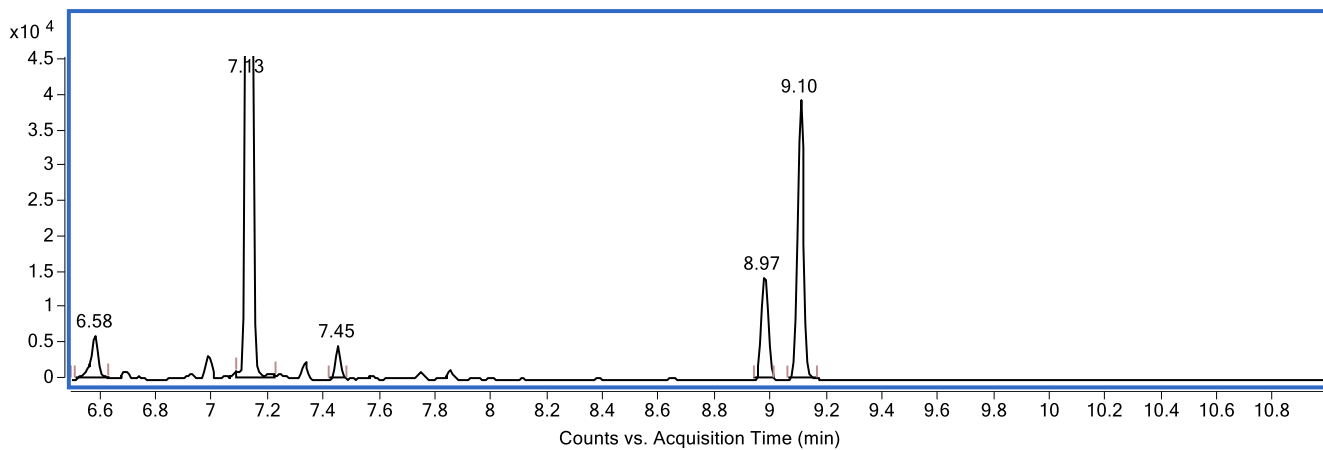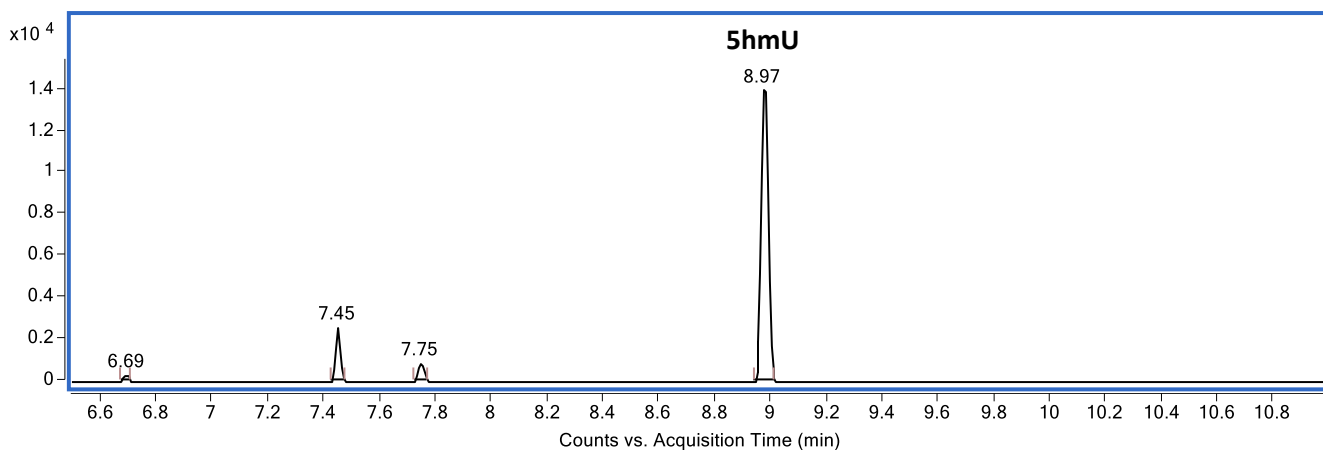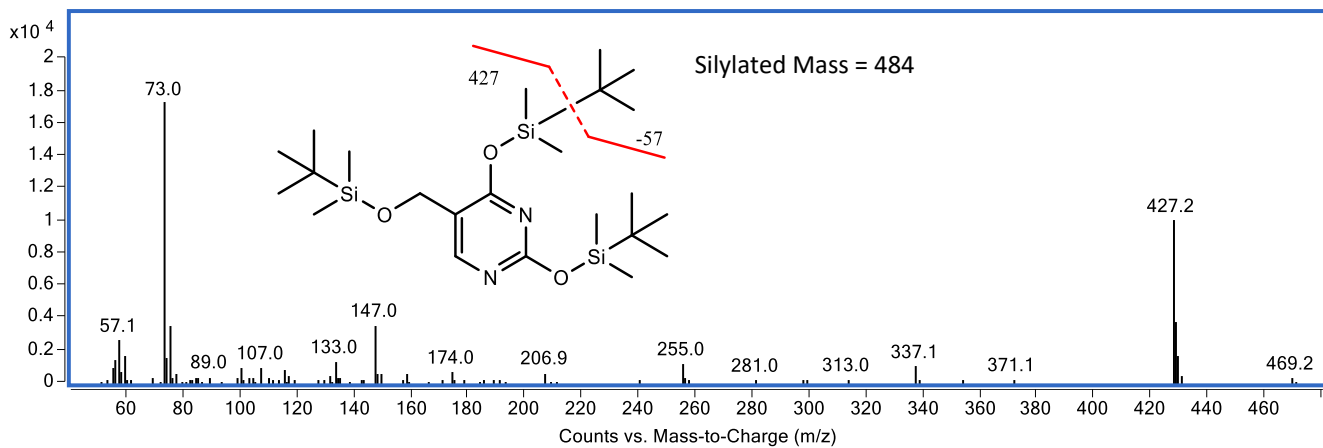

# Quad-22mer-U-FAM-BHQ1

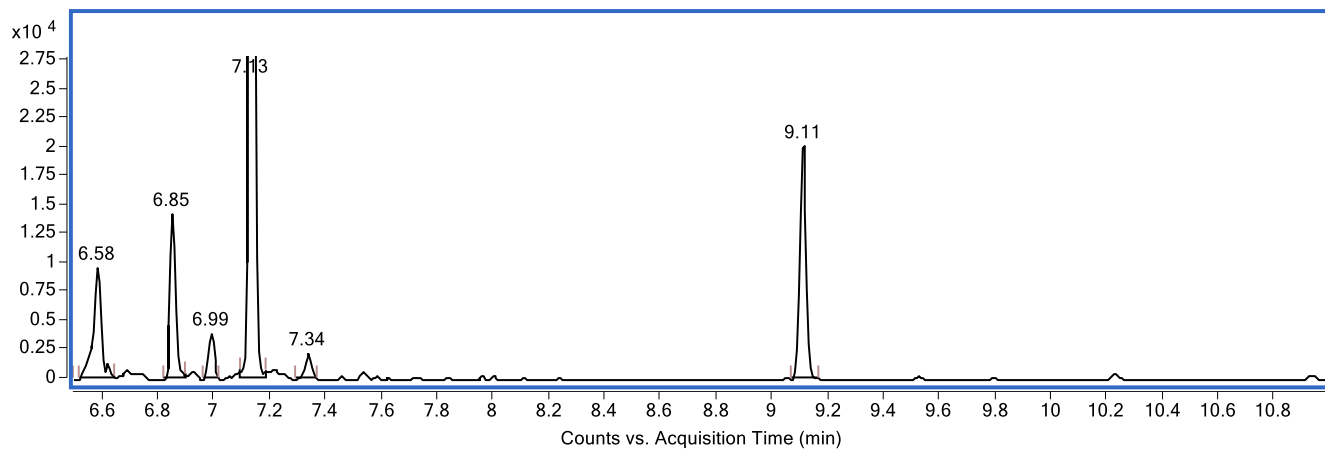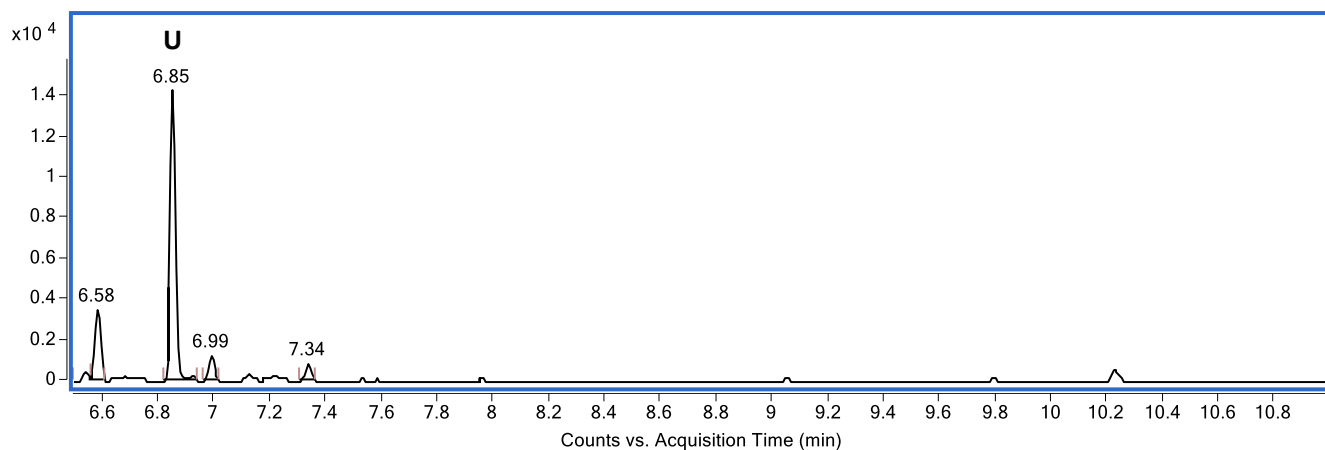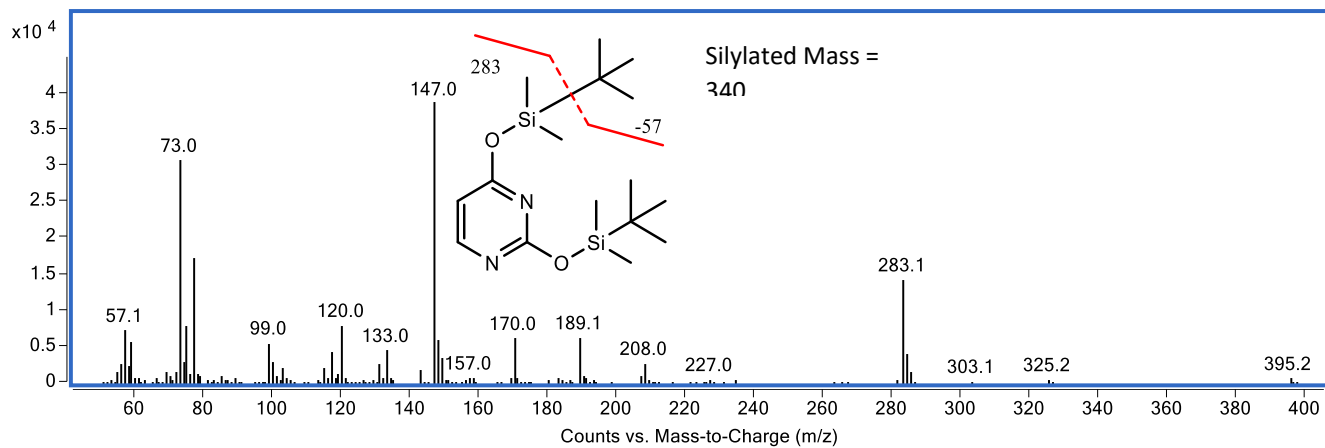

# Quad-22mer-5FU-FAM-BHQ1

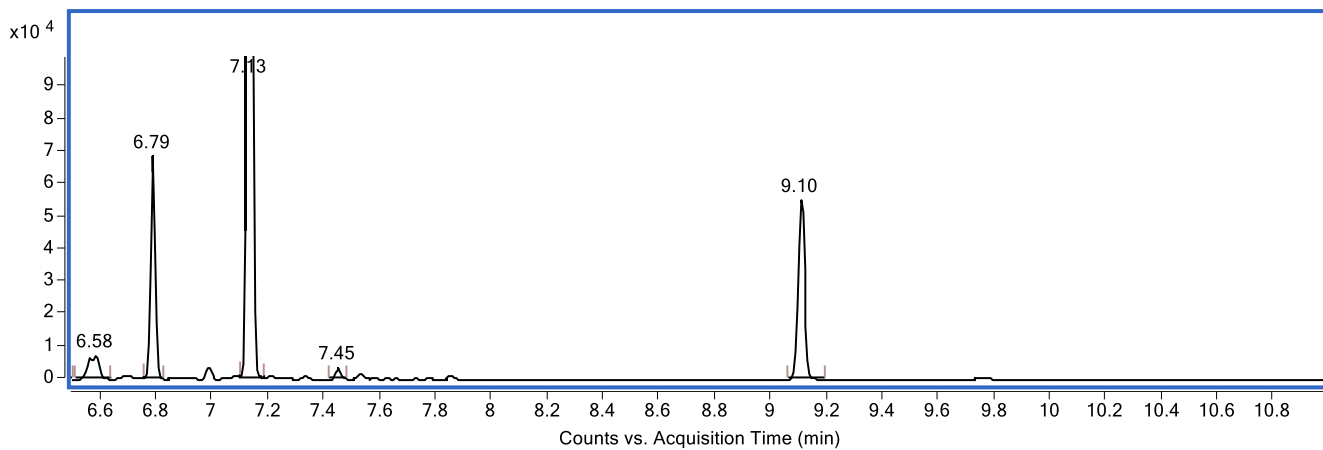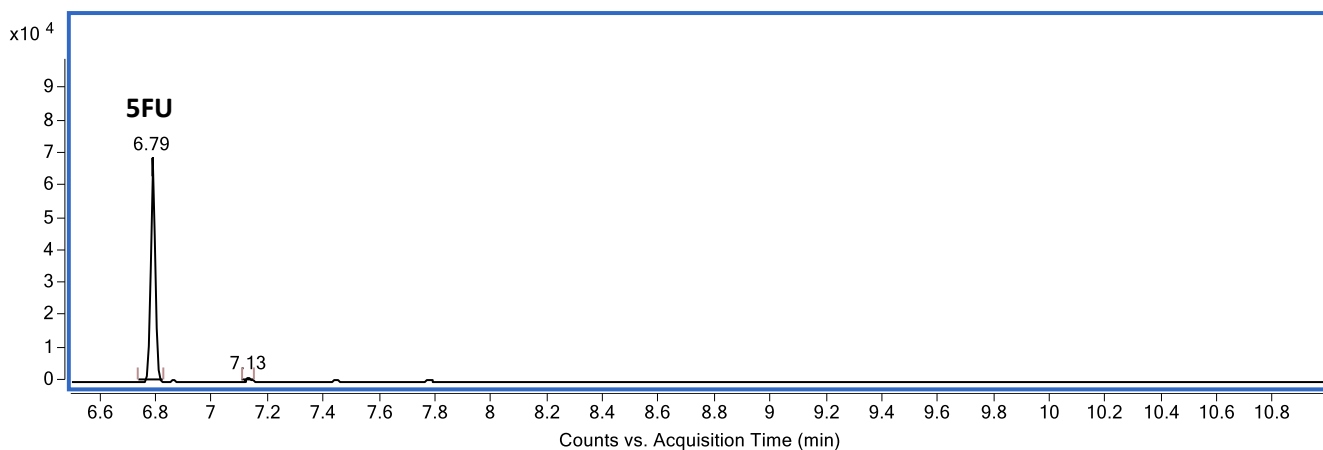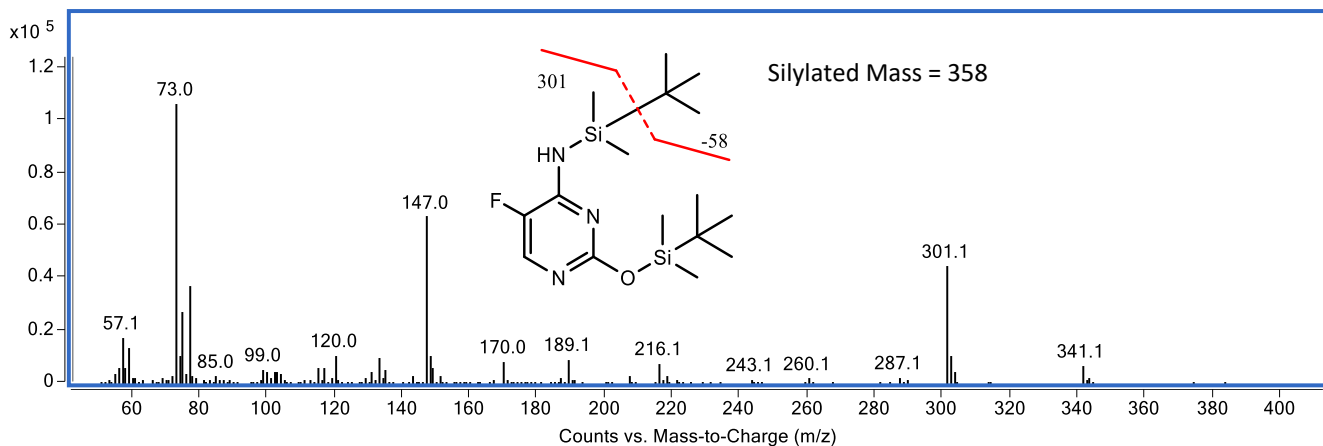

# Quad-22mer-5hmU-FAM-BHQ1

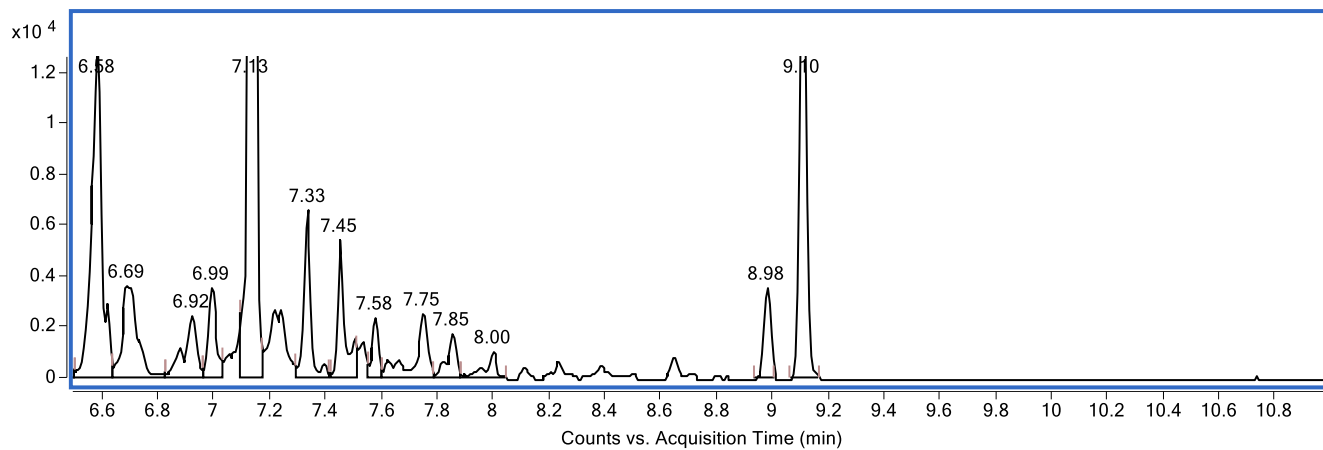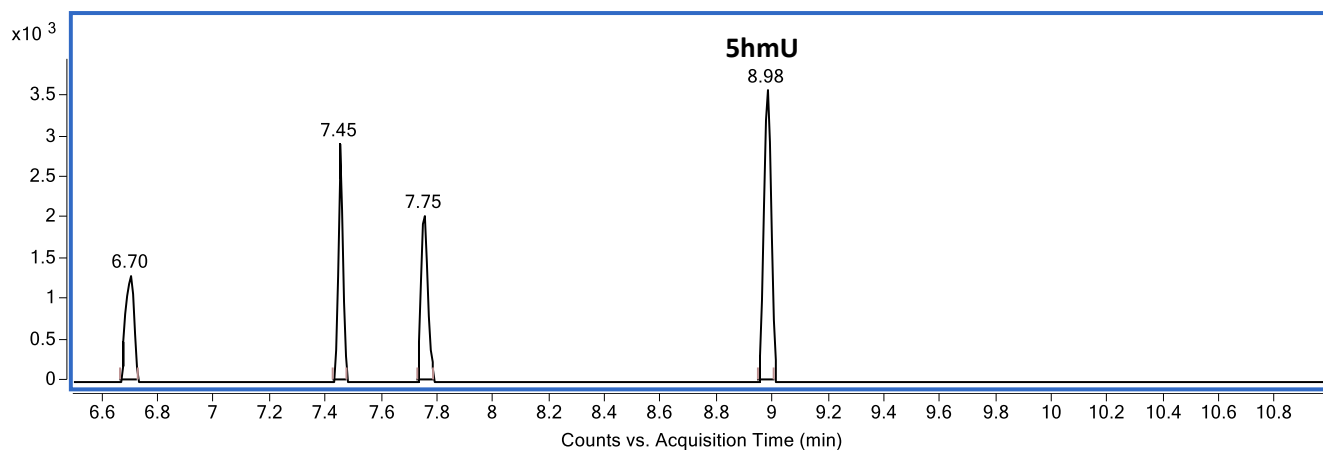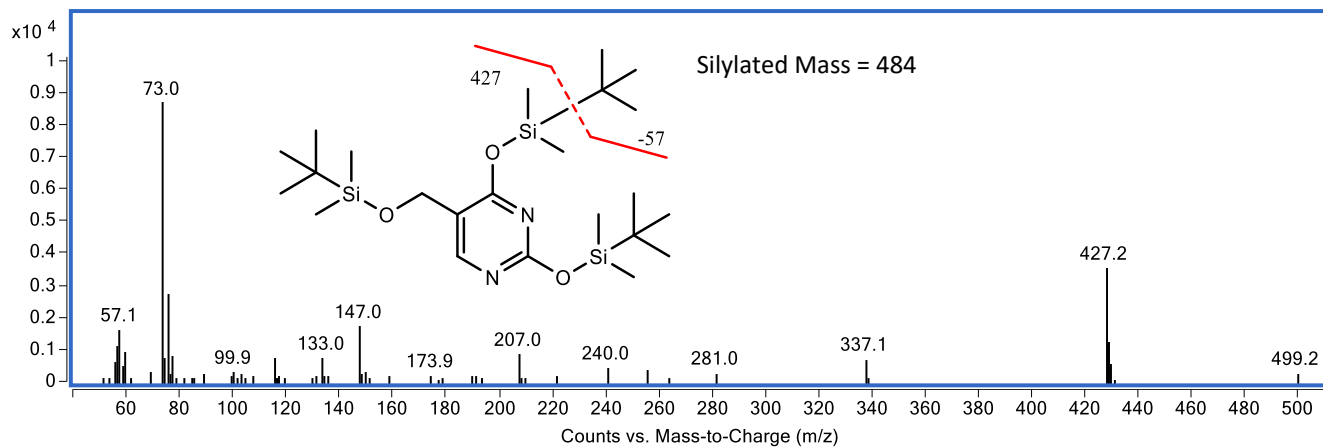

# Quad-22mer-U-Comp

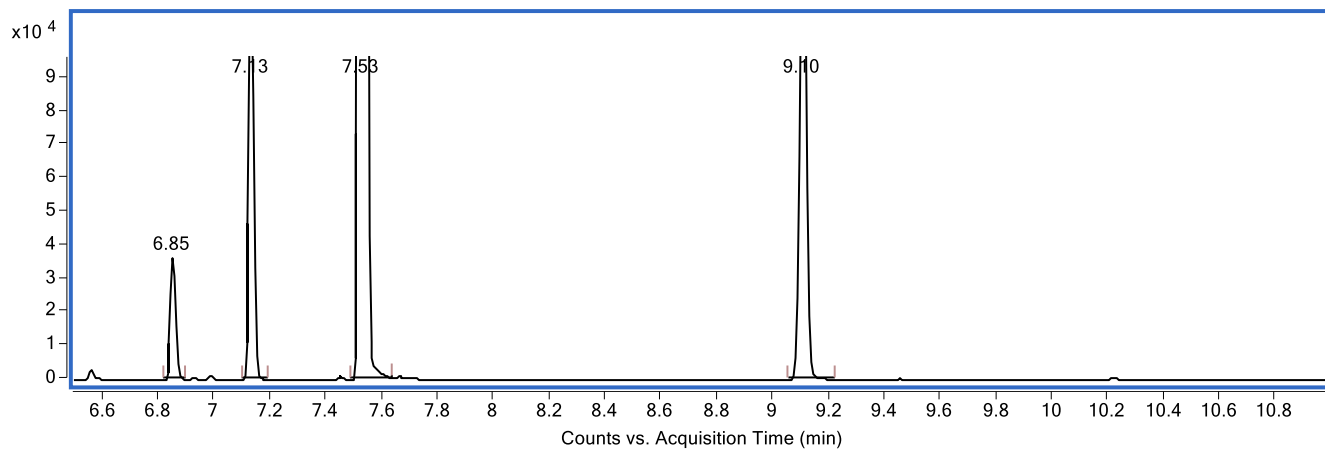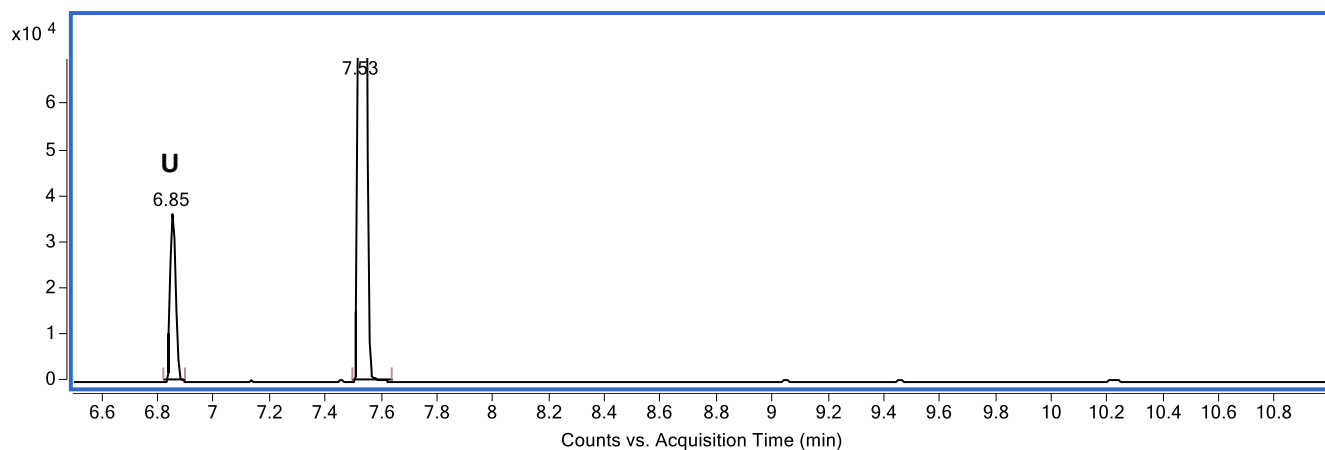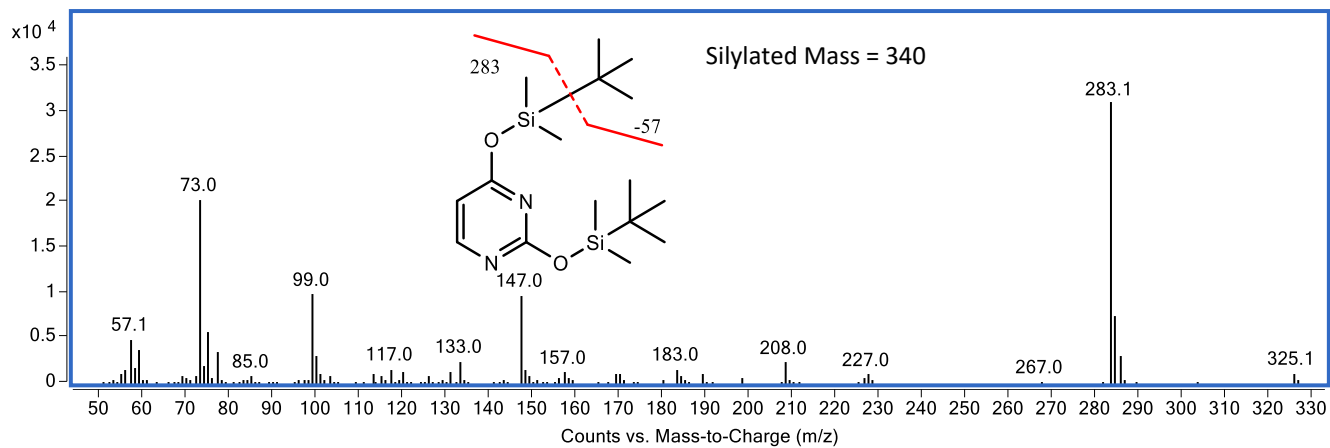

# Quad-22mer-U-Comp-Cy5

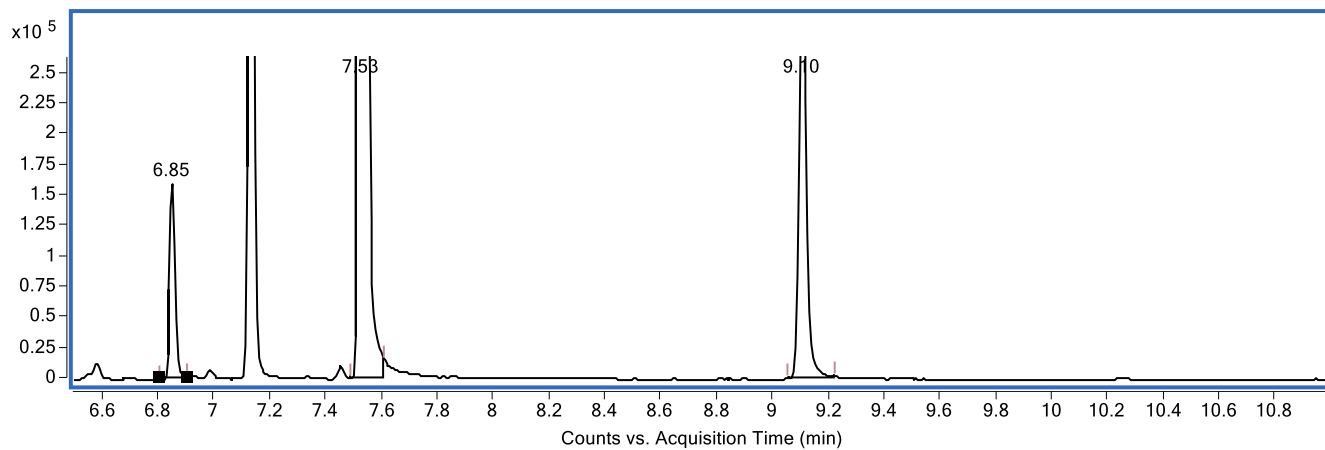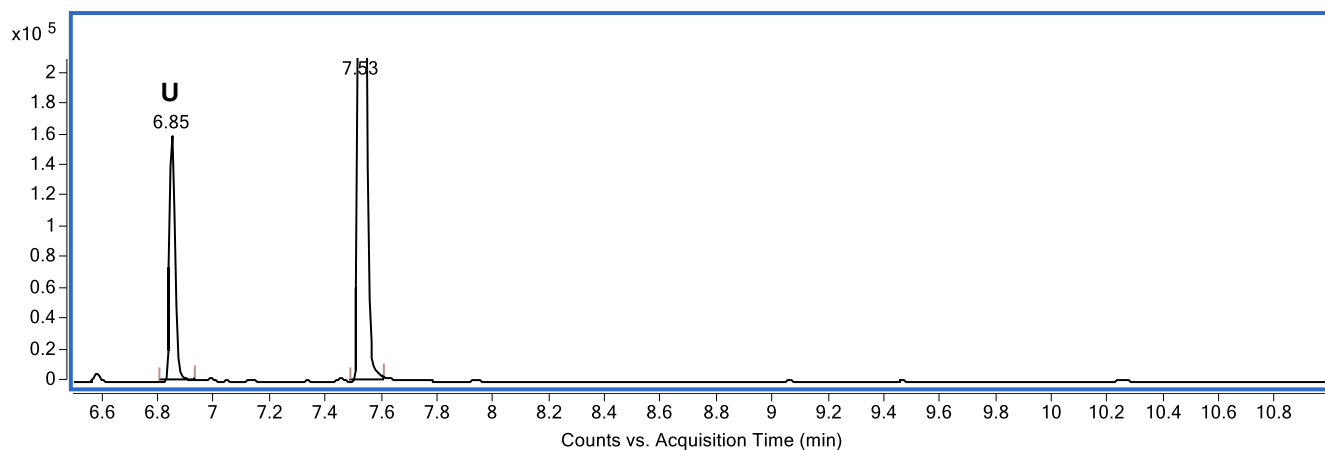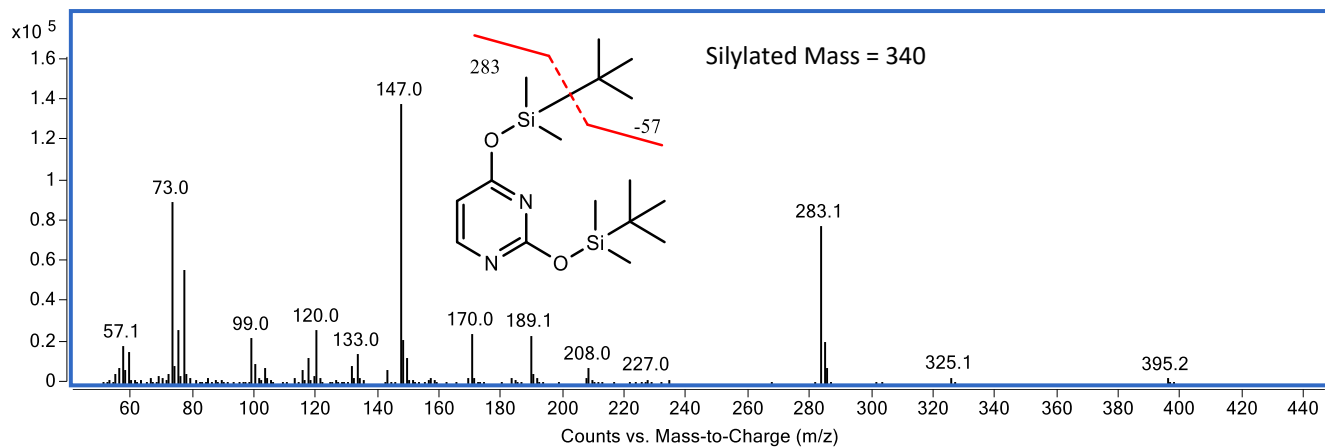

## 22mer-nonquad\_5hmU

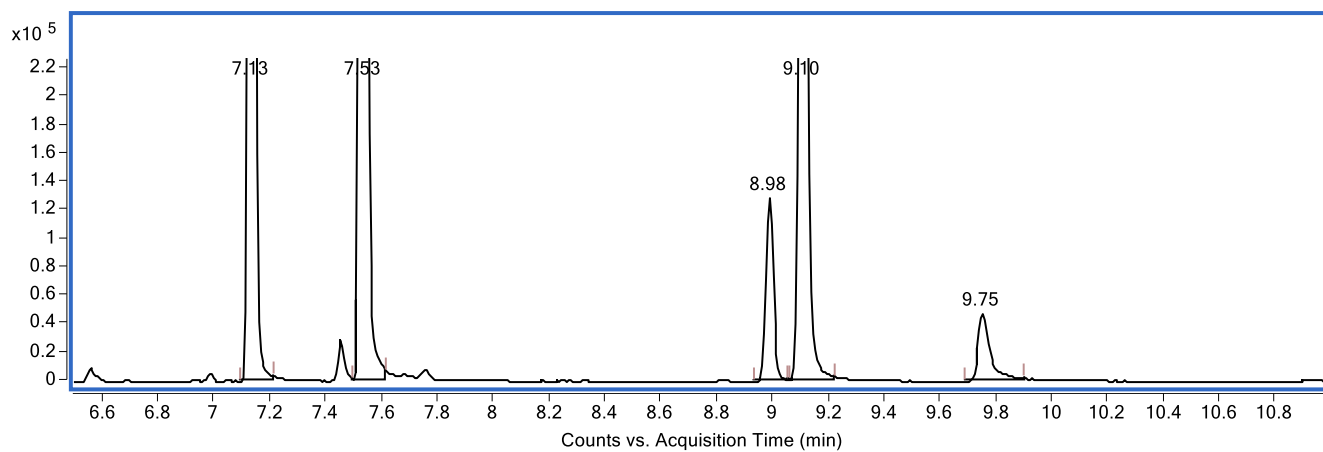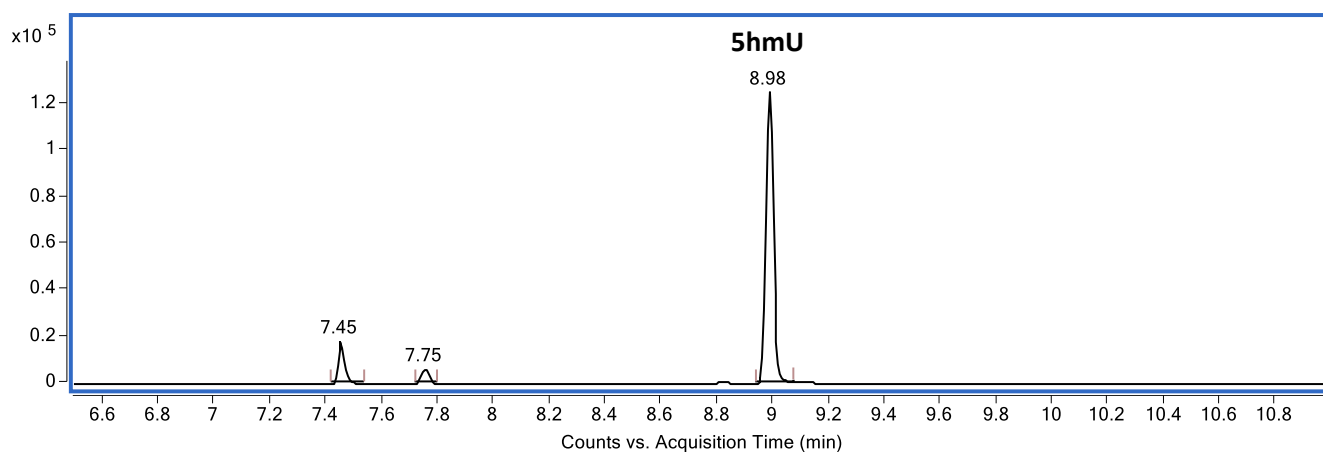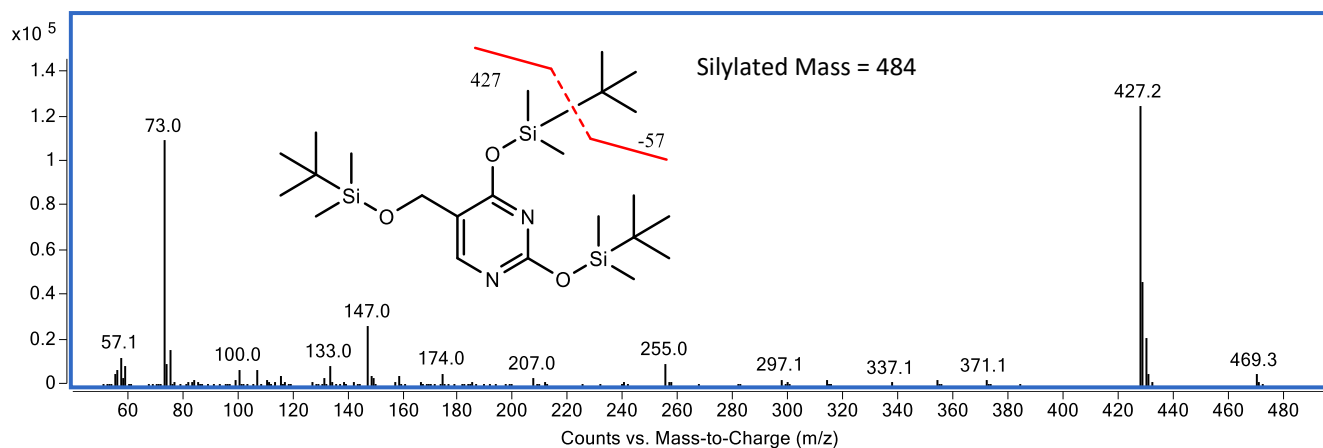



## 22mer-nonquad\_U

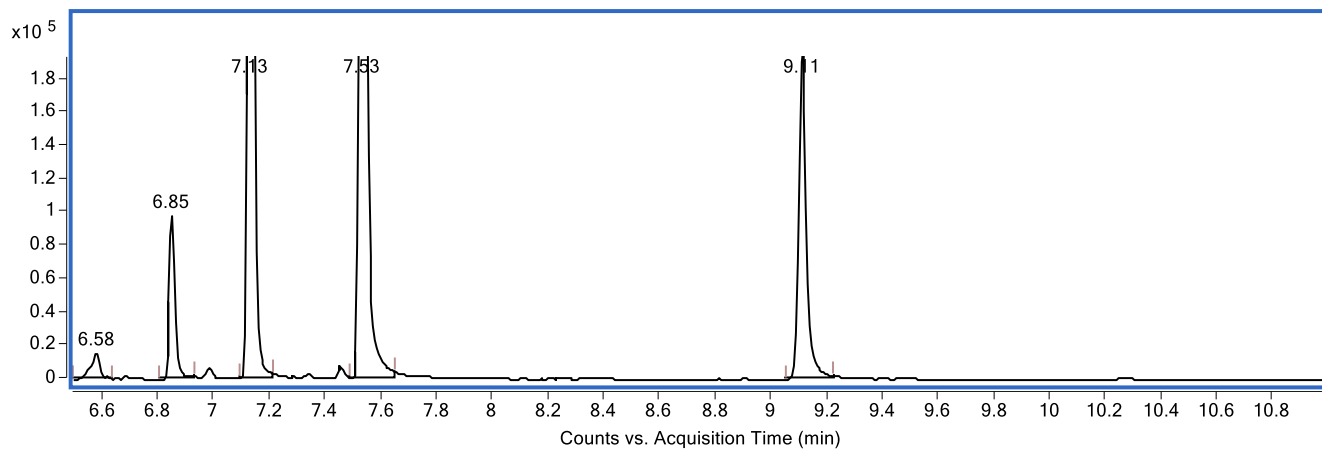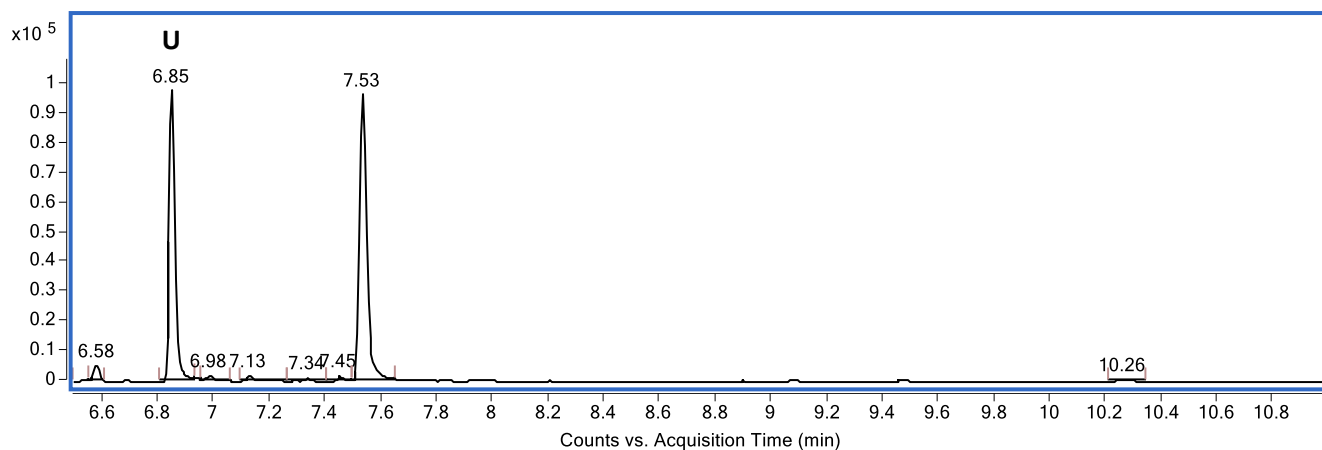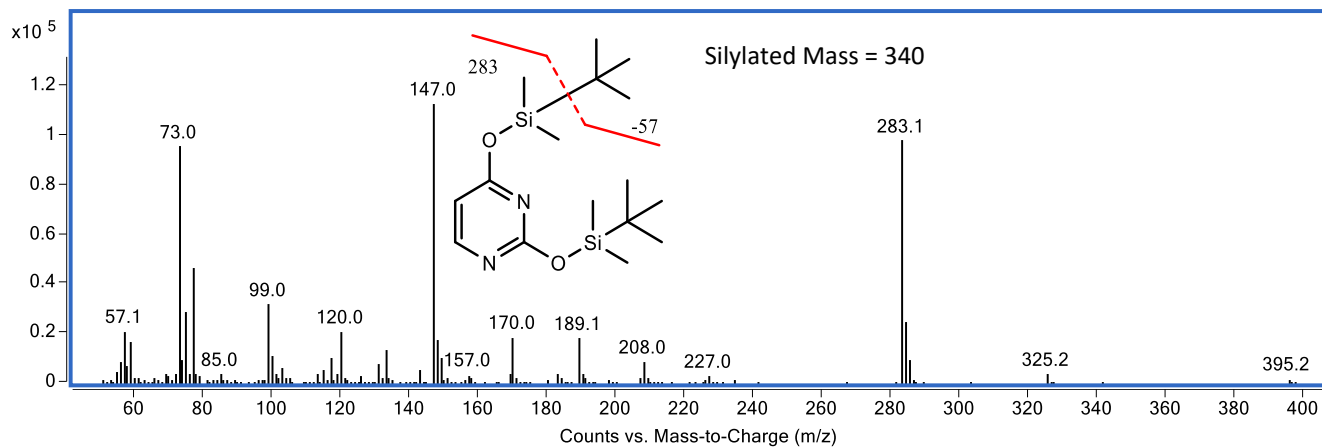

Supplement: s1 [file s1]
