# Supplementary material for: DNA Base Excision Repair Intermediates Influence Duplex–Quadruplex Equilibrium
Source: MDPI journal article supplement (doi:10.3390/molecules28030970), 2023-01-18
Supplement: s1 [file s1]

## **DNA Base Excision Repair Intermediates Influence Duplex—Quadruplex Equilibrium**

Mark L. Sowers<sup>1,2</sup>, James W. Conrad<sup>1</sup>, Bruce Chang-Gu<sup>1,2</sup>, Ellie Cherryhomes<sup>1</sup>, Linda C. Hackfeld<sup>1</sup>, and Lawrence C. Sowers<sup>1,3,&</sup>

<sup>1</sup>Department of Pharmacology and Toxicology, 301 University Boulevard, Galveston, TX 77555, USA

<sup>2</sup>MD-PhD Combined Degree Program, 301 University Boulevard, Galveston, TX 77555, USA

<sup>3</sup>Department of Internal Medicine, University of Texas Medical Branch, 301 University Boulevard, Galveston, TX 77555, USA

&Address correspondence to Lawrence Sowers, e-mail [lasowers@UTMB.edu](mailto:lasowers@UTMB.edu), phone 409-772-9678.

## Supporting Information

**Table S1. DNA glycosylase and APE1 rate constants for Figure 3.**

- Figure S1. Unedited gel scans of UDG time course with U:A substrate in Fig. 3A.  
Figure S2. Unedited gel scans of UDG time course with Tel22-U substrate in Fig. 3A.  
Figure S3. Unedited gel scans of UDG time course with NQ-U substrate in Fig. 3A.  
Figure S4. Unedited gel scans of UDG time course with 5FU:A substrate in Fig. 3B.  
Figure S5. Unedited gel scans of UDG time course with Tel22-5FU substrate in Fig. 3B.  
Figure S6. Unedited gel scans of UDG time course with NQ-5FU substrate in Fig. 3B.  
Figure S7. Unedited gel scans of hSMUG1 time course with substrate U:A in Fig. 3C.  
Figure S8. Unedited gel scans of hSMUG1 time course with substrate Tel22-U in Fig. 3C.  
Figure S9. Unedited gel scans of hSMUG1 time course with substrate NQ-U in Fig. 3C.  
Figure S10. Unedited gel scans of hSMUG1 time course with substrate 5hmU:A in Fig. 3D.  
Figure S11. Unedited gel scans of hSMUG1 time course with substrate Tel22-5hmU in Fig. 3D.  
Figure S12. Unedited gel scans of hSMUG1 time course with substrate NQ-5hmU in Fig. 3D.  
Figure S13. Unedited gel scans of APE 1 time course with substrate THF:A in Fig. 3E.  
Figure S14. Unedited gel scans of APE 1 time course with substrate Tel22-THF in Fig. 3E.  
Figure S15. Unedited gel scans of APE 1 time course with substrate NQ-THF in Fig. 3E.  
Figure S16. Unedited gel scans of the  $\beta$ -elimination time course with UDG treated substrate Tel22-U in Fig. 3F.  
Figure S17. Quadruplexes quench fluorescence compared to duplex.  
Figure S18. Rate of gap formation in Figure 6 time course.

|               | <b>UDG</b>               | <b>hSMUG1</b>            | <b>APE 1</b>             |
|---------------|--------------------------|--------------------------|--------------------------|
| Rate Constant | $k$ (min <sup>-1</sup> ) | $k$ (min <sup>-1</sup> ) | $k$ (min <sup>-1</sup> ) |
| U:A           | 0.2827                   | 0.1288                   |                          |
| Gquad U       | 0.1518                   | 0.08188                  |                          |
| Non-quad U    | 0.4972                   | 0.8288                   |                          |
|               |                          |                          |                          |
| 5FU:A         | 0.1498                   |                          |                          |
| Gquad 5FU     | 0.1050                   |                          |                          |
| Non-quad 5FU  | 0.2935                   |                          |                          |
|               |                          |                          |                          |
| 5hmU:A        |                          | 0.07423                  |                          |
| Gquad 5hmU    |                          | 0.02041                  |                          |
| Non-quad 5hmU |                          | 0.4537                   |                          |
|               |                          |                          |                          |
| THF:A         |                          |                          | 0.6587                   |
| Gquad THF     |                          |                          | NA                       |
| Non-quad THF  |                          |                          | NA                       |

**Table S1. DNA glycosylase and APE1 rate constants for Figure 3.** A single exponential fit was used with the y-intercept fixed to 0. Fitting was done in PRISM 9.4.1.

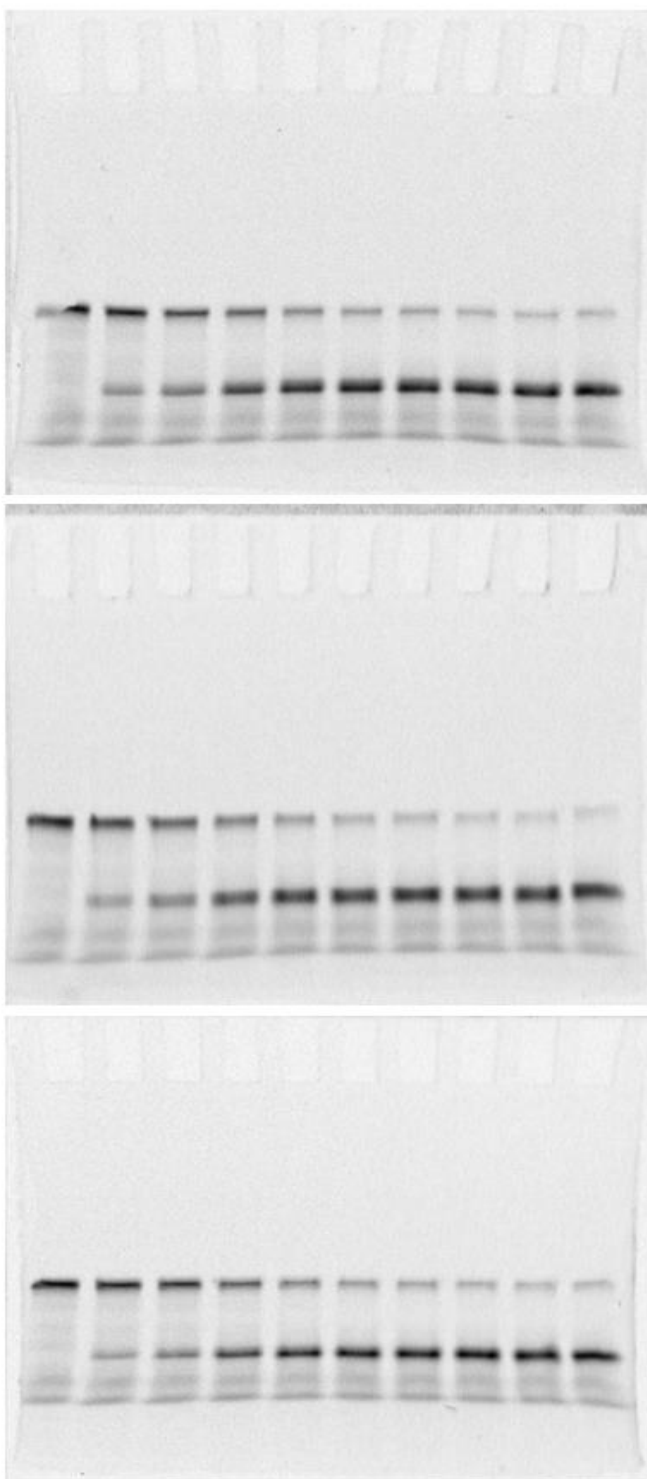

Figure S1. Unedited gel scans of UDG time course with U:A substrate in Fig. 3A.

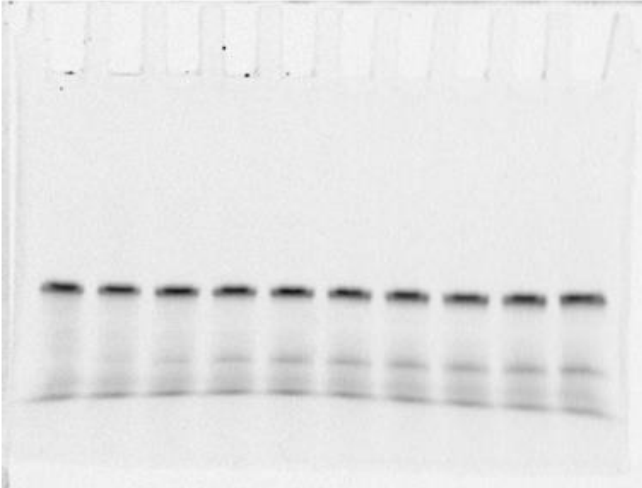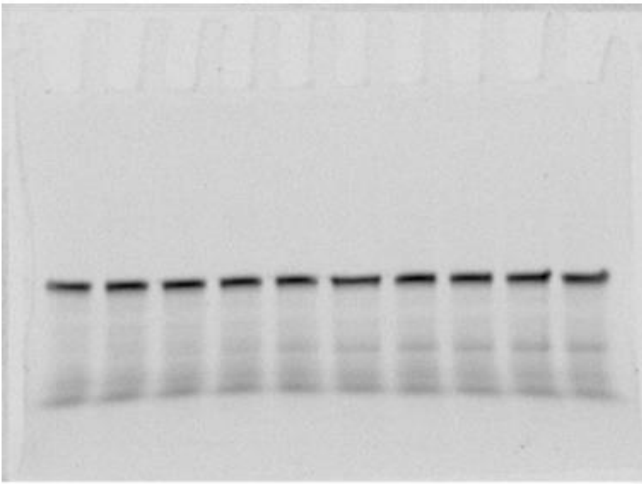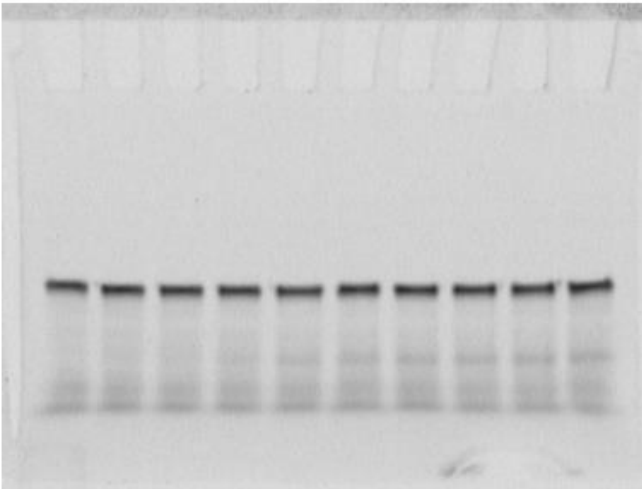

**Figure S2. Unedited gel scans of UDG time course with Tel22-U substrate in Fig. 3A.**

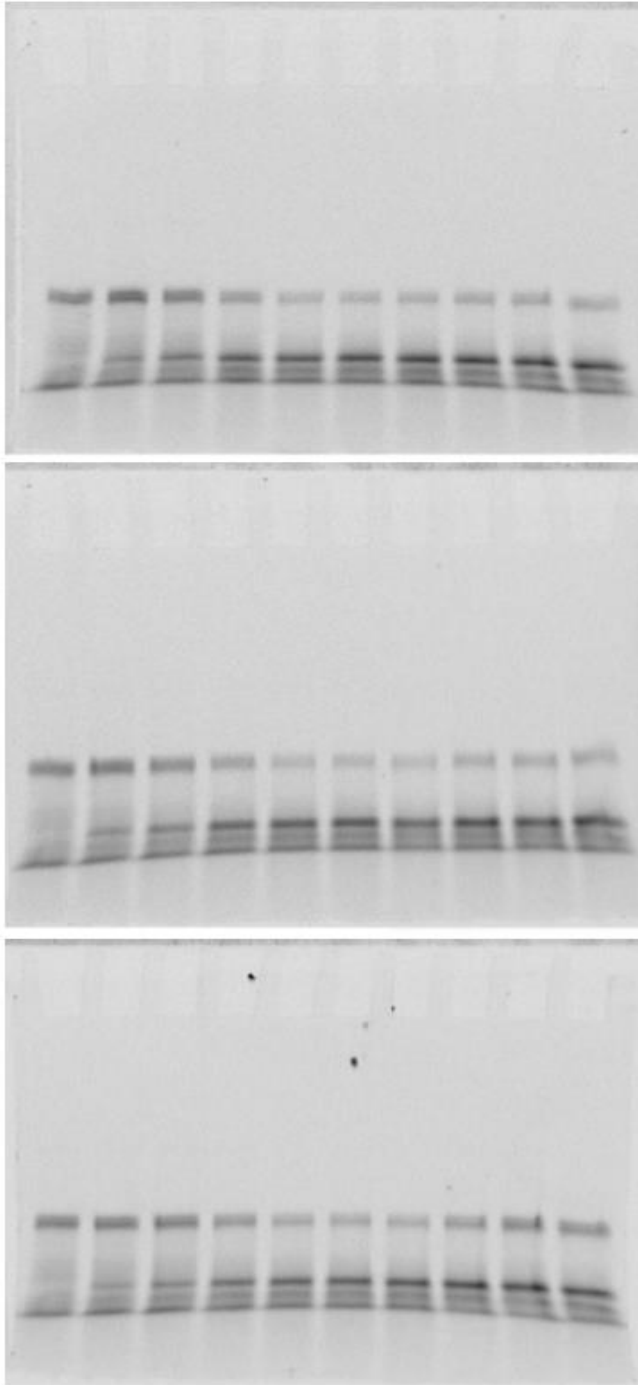

Figure S3. Unedited gel scans of UDG time course with NQ-U substrate in Fig. 3A.

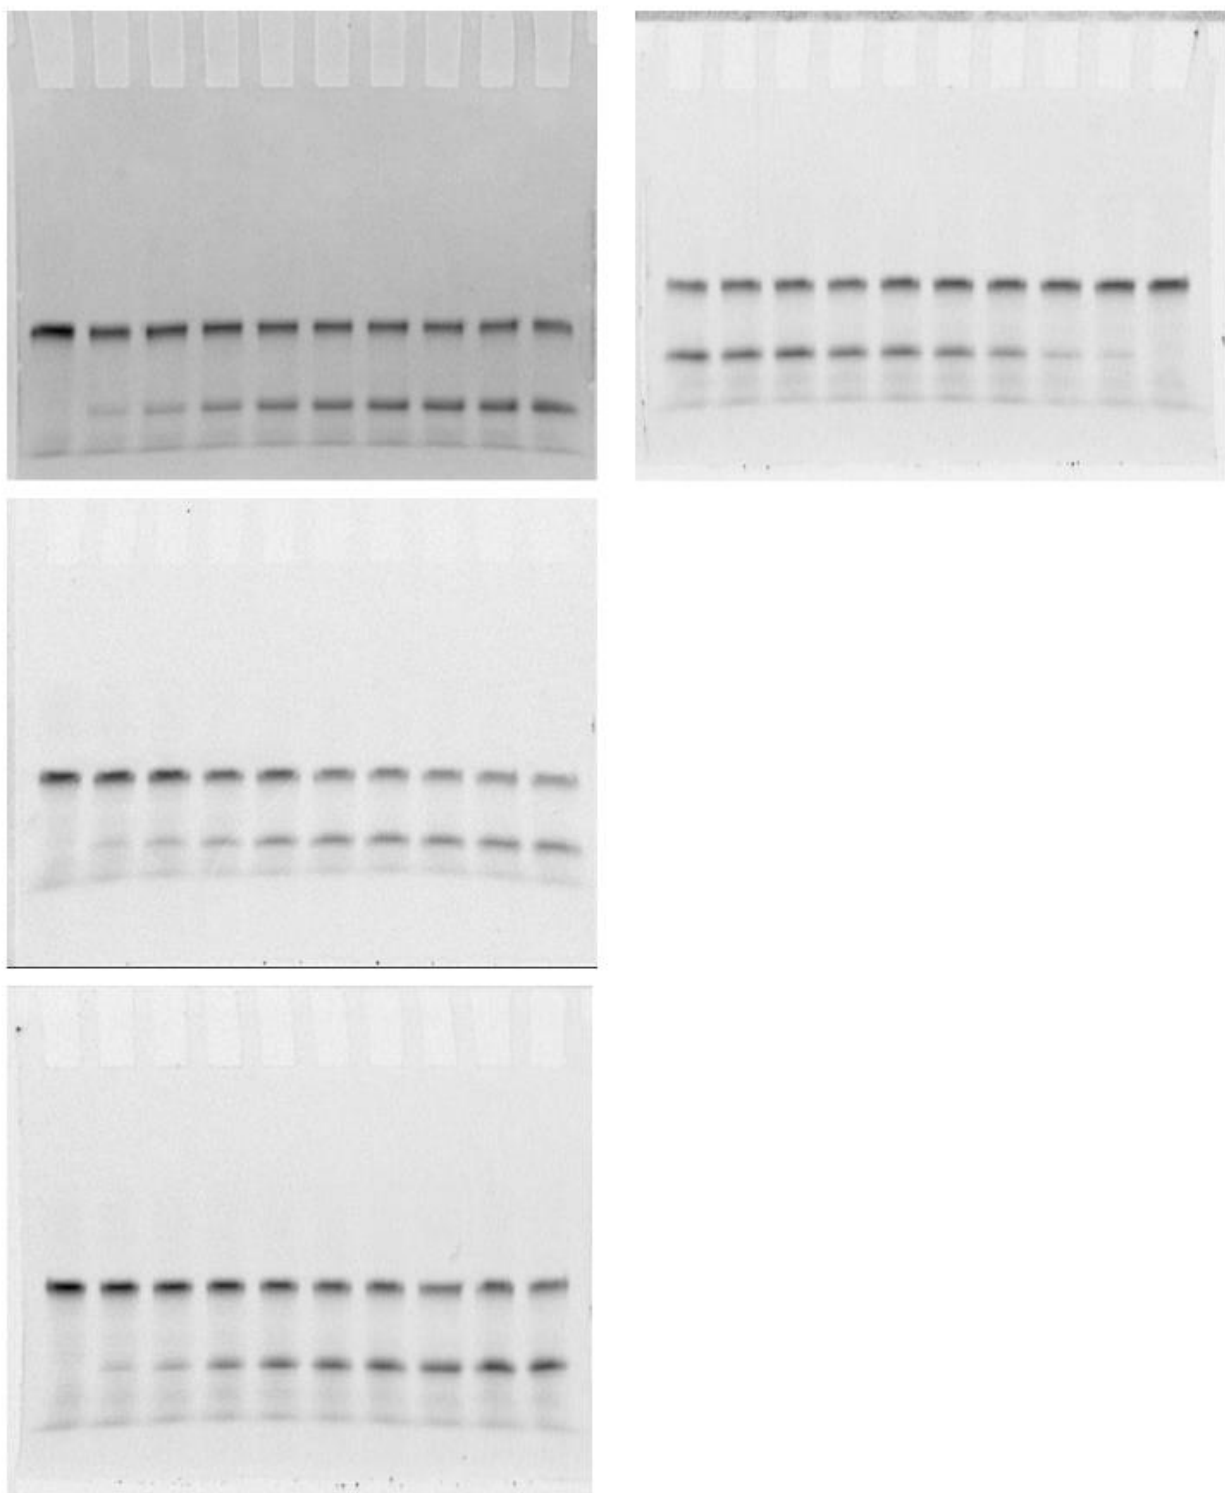

**Figure S4. Unedited gel scans of UDG time course with 5FU:A substrate in Fig. 3B.**

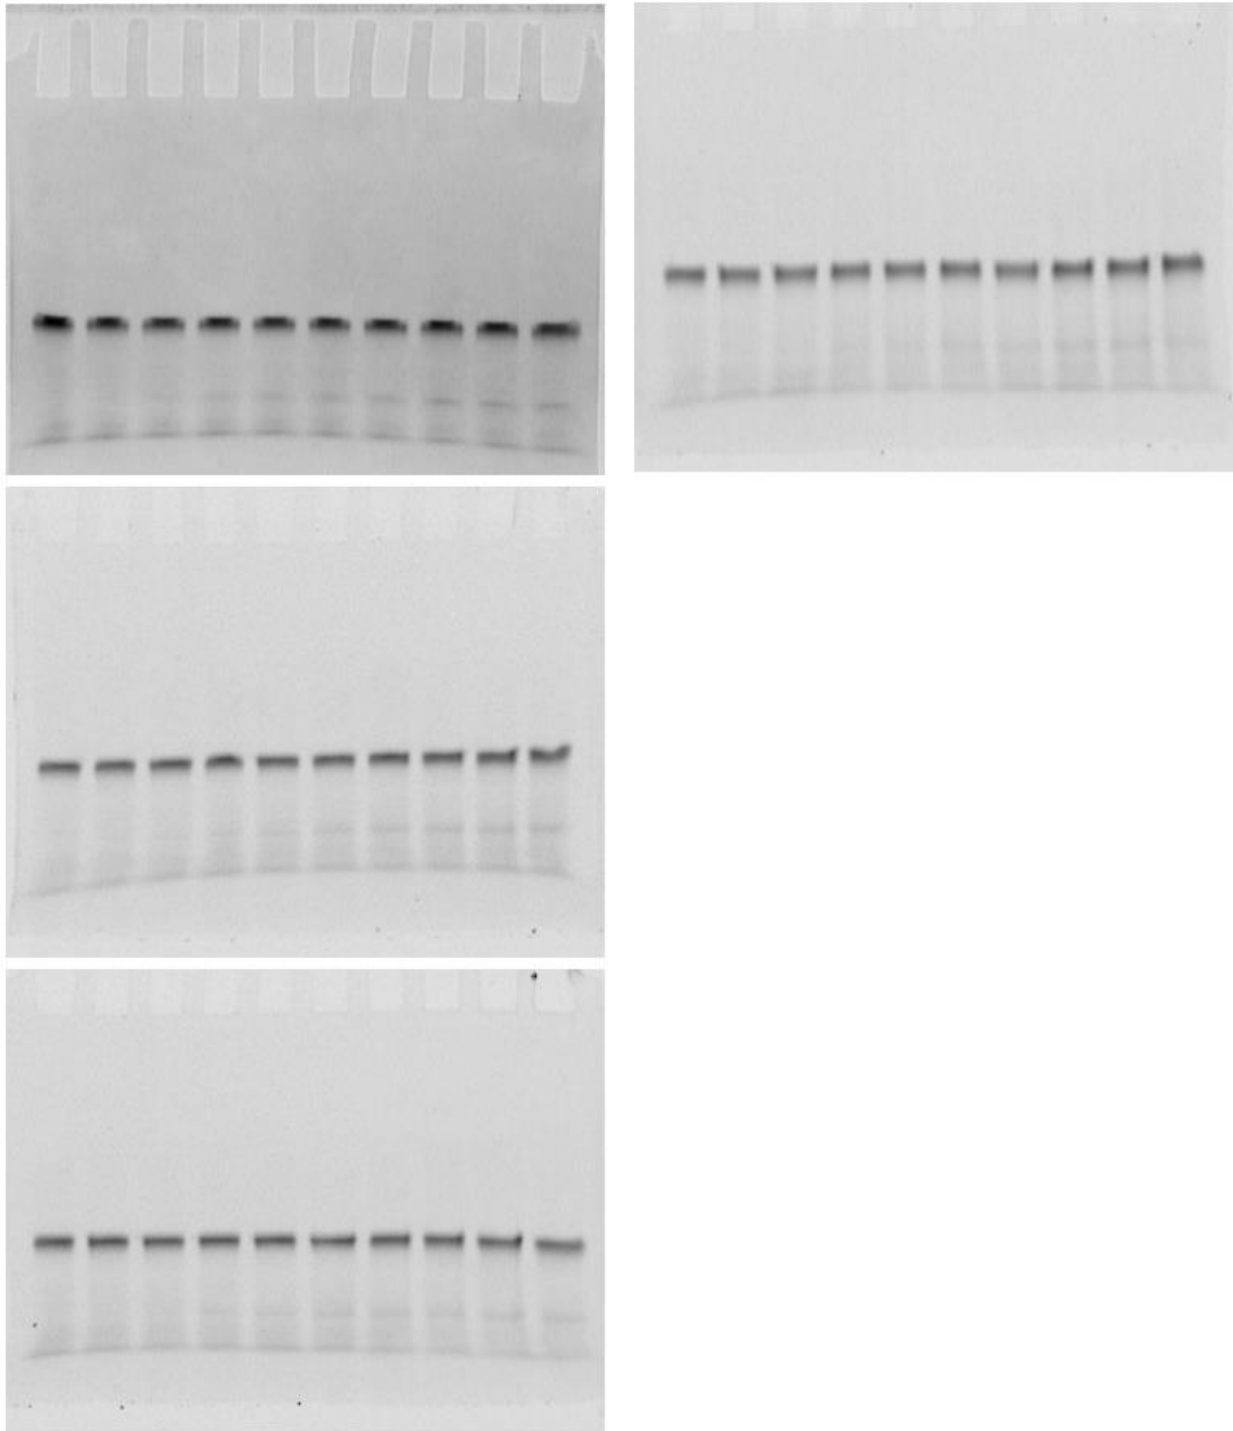

**Figure S5. Unedited gel scans of UDG time course with Tel22-5FU substrate in Fig. 3B.**



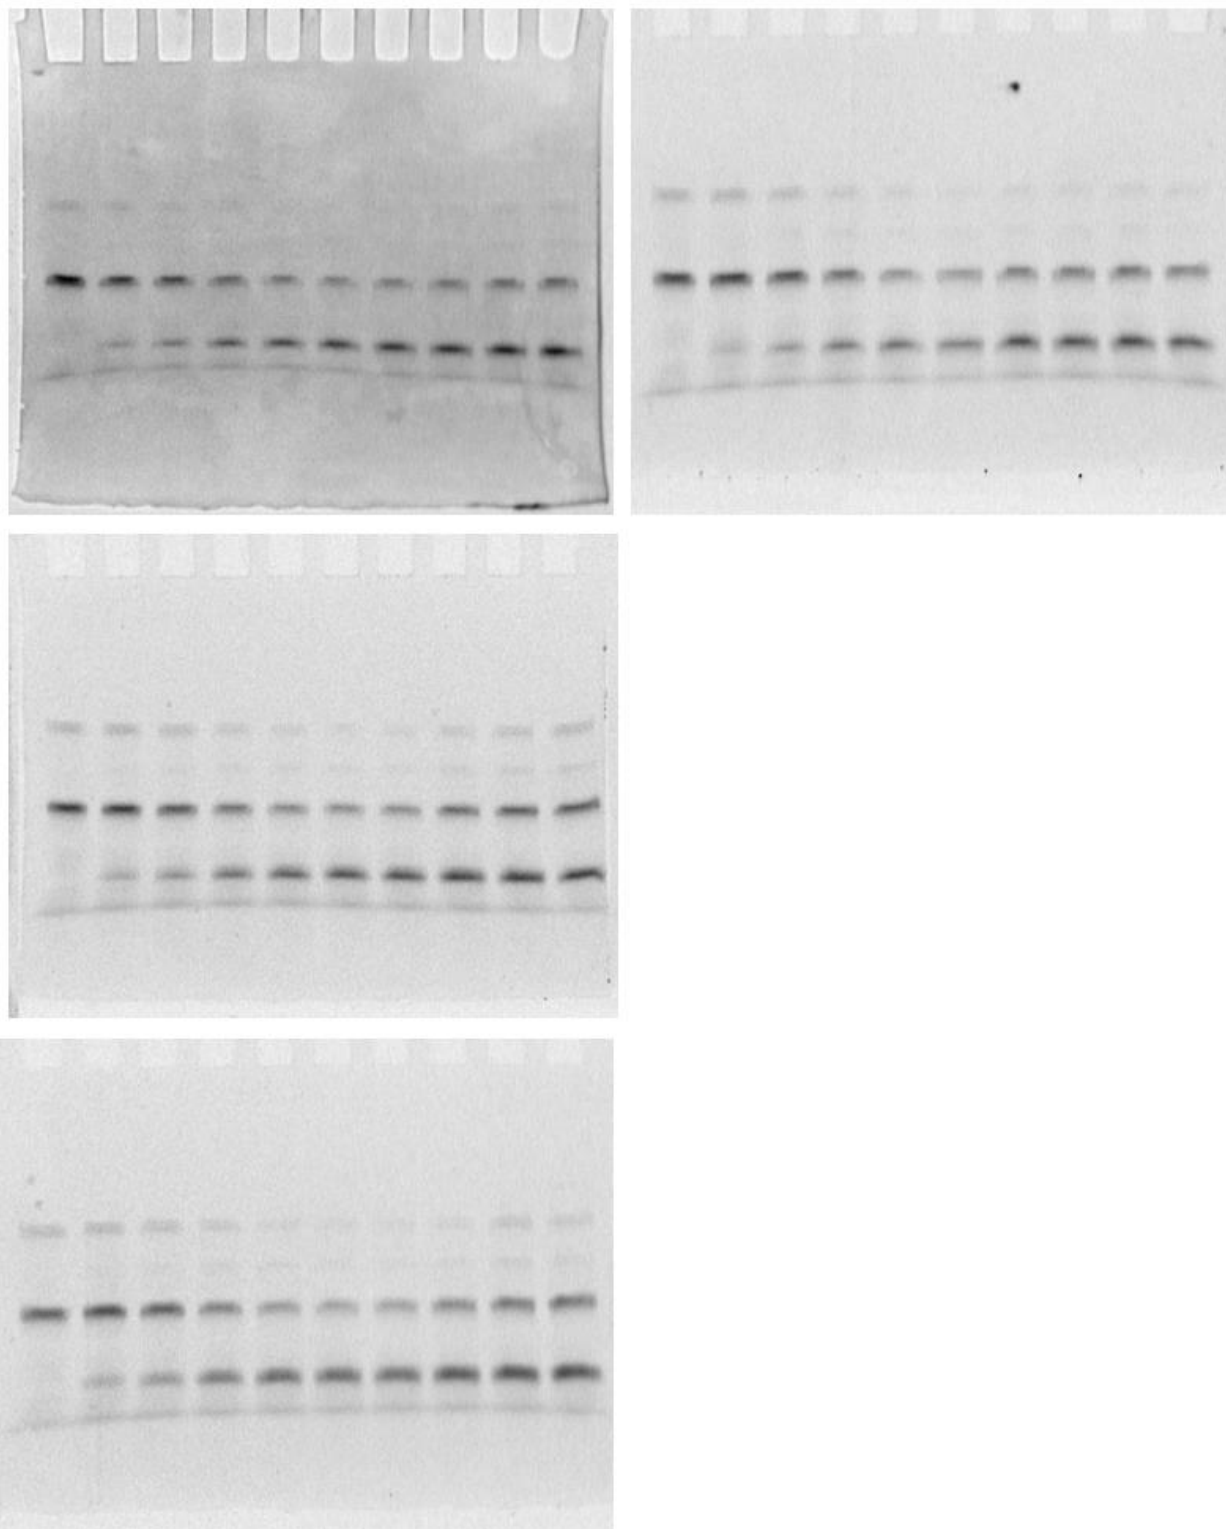

Figure S6. Unedited gel scans of UDG time course with NQ-5FU substrate in Fig. 3B.

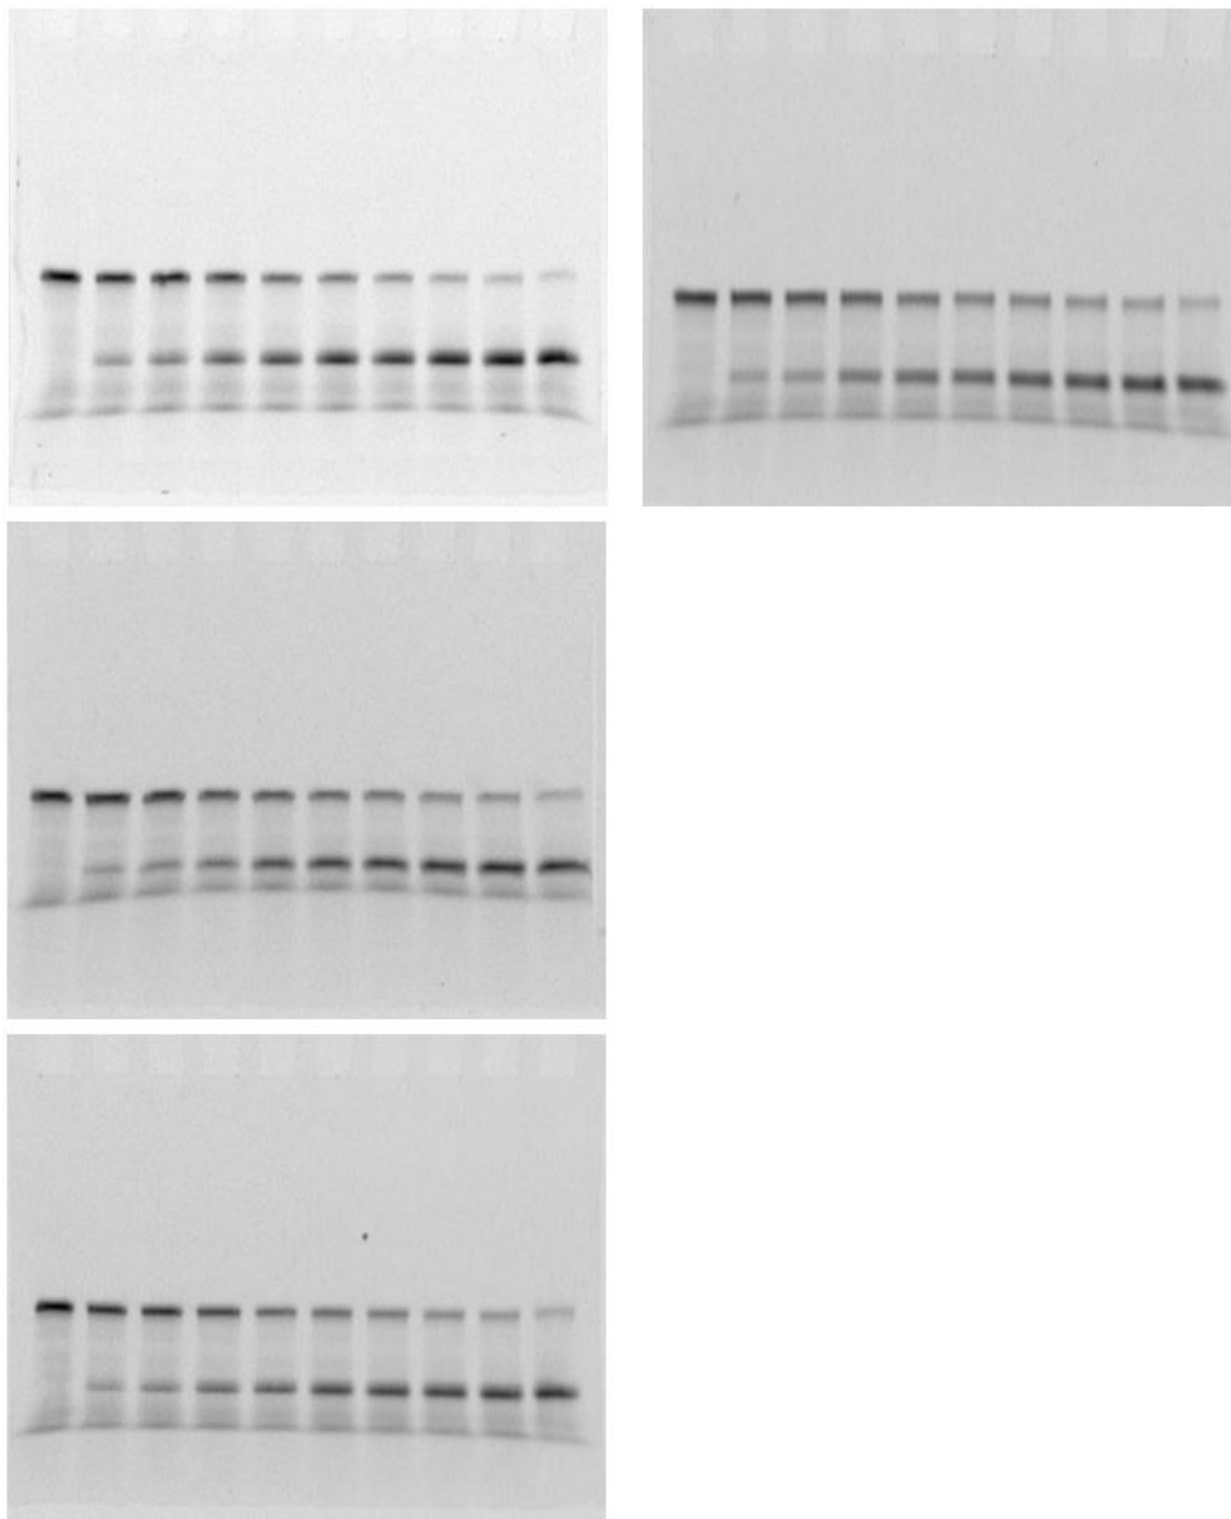

Figure S7. Unedited gel scans of hSMUG1 time course with substrate U:A in Fig. 3C.

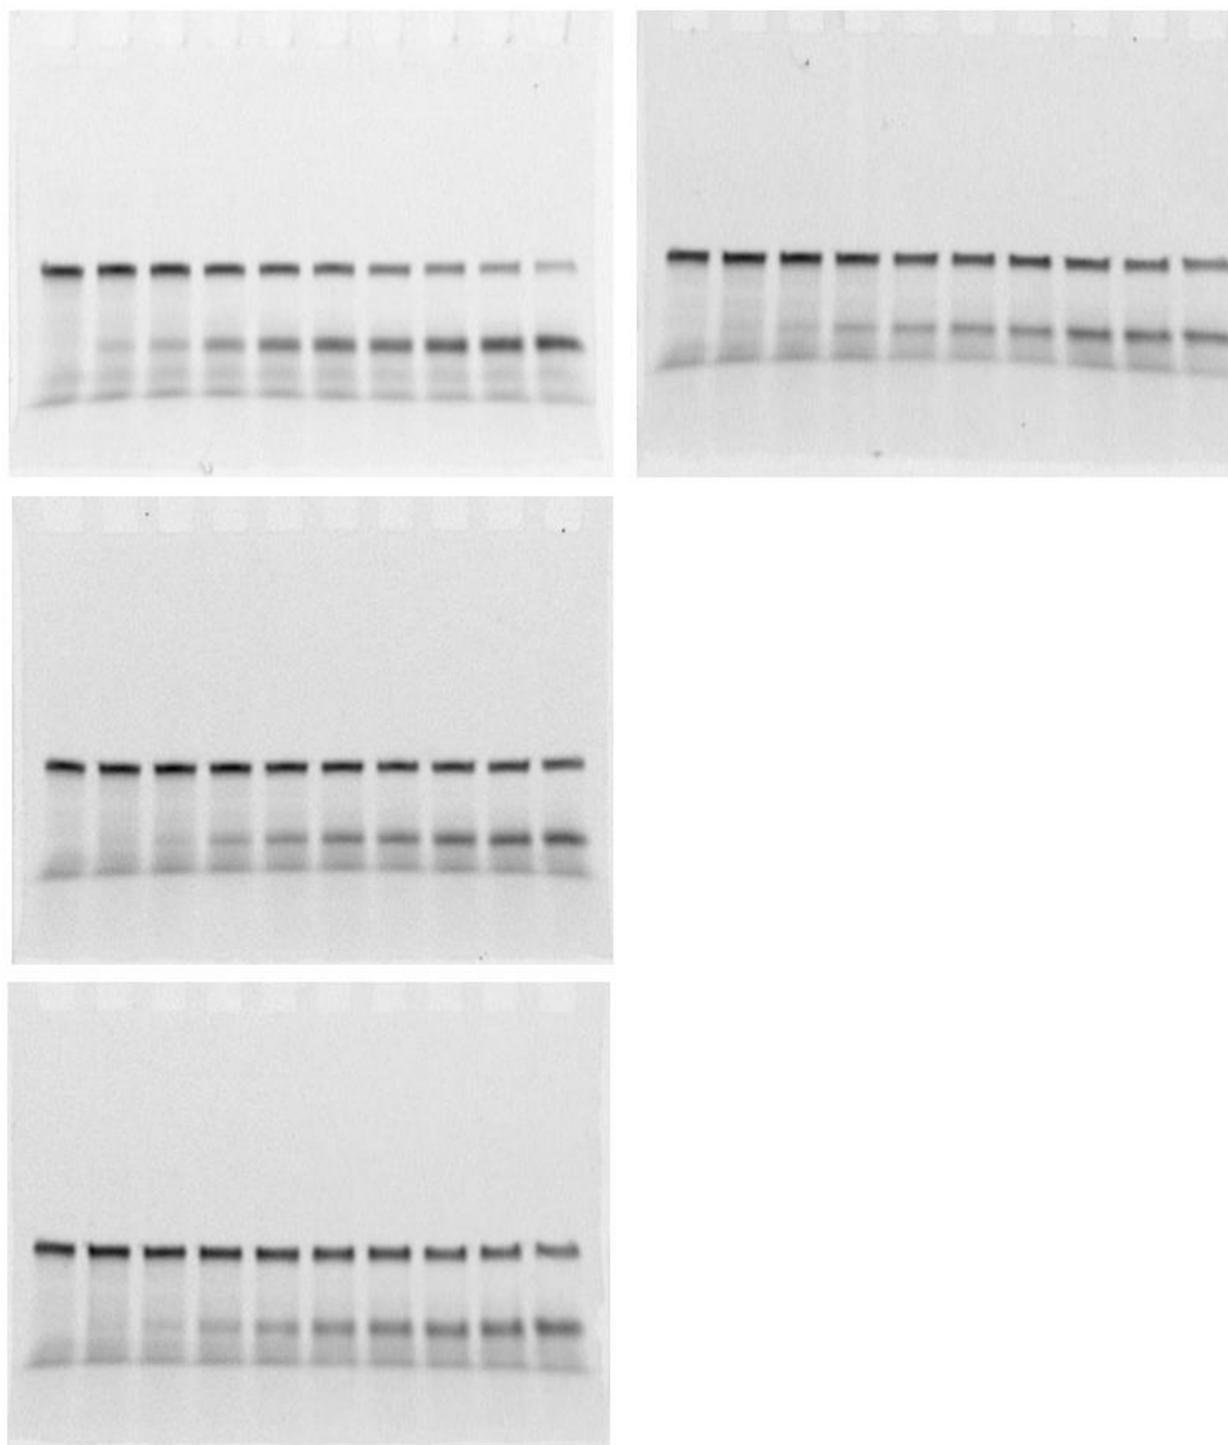

Figure S8. Unedited gel scans of hSMUG1 time course with substrate Tel22-U in Fig. 3C.

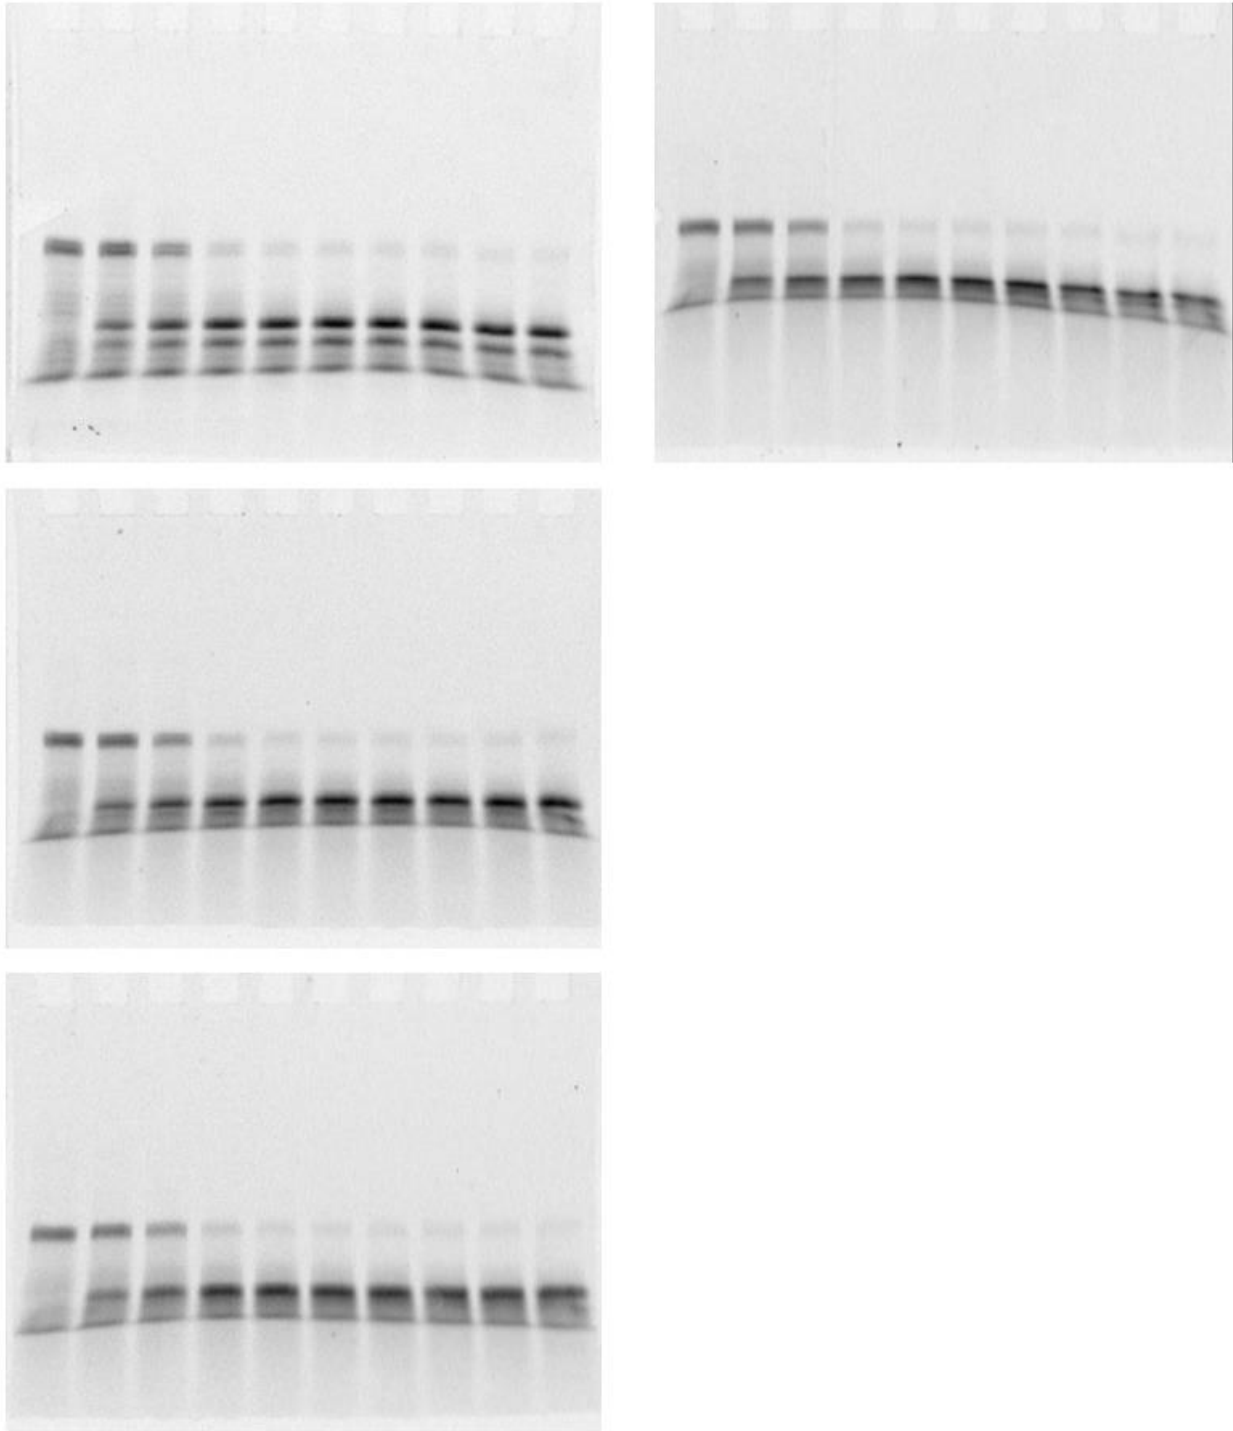

**Figure S9. Unedited gel scans of hSMUG1 time course with substrate NQ-U in Fig. 3C.**

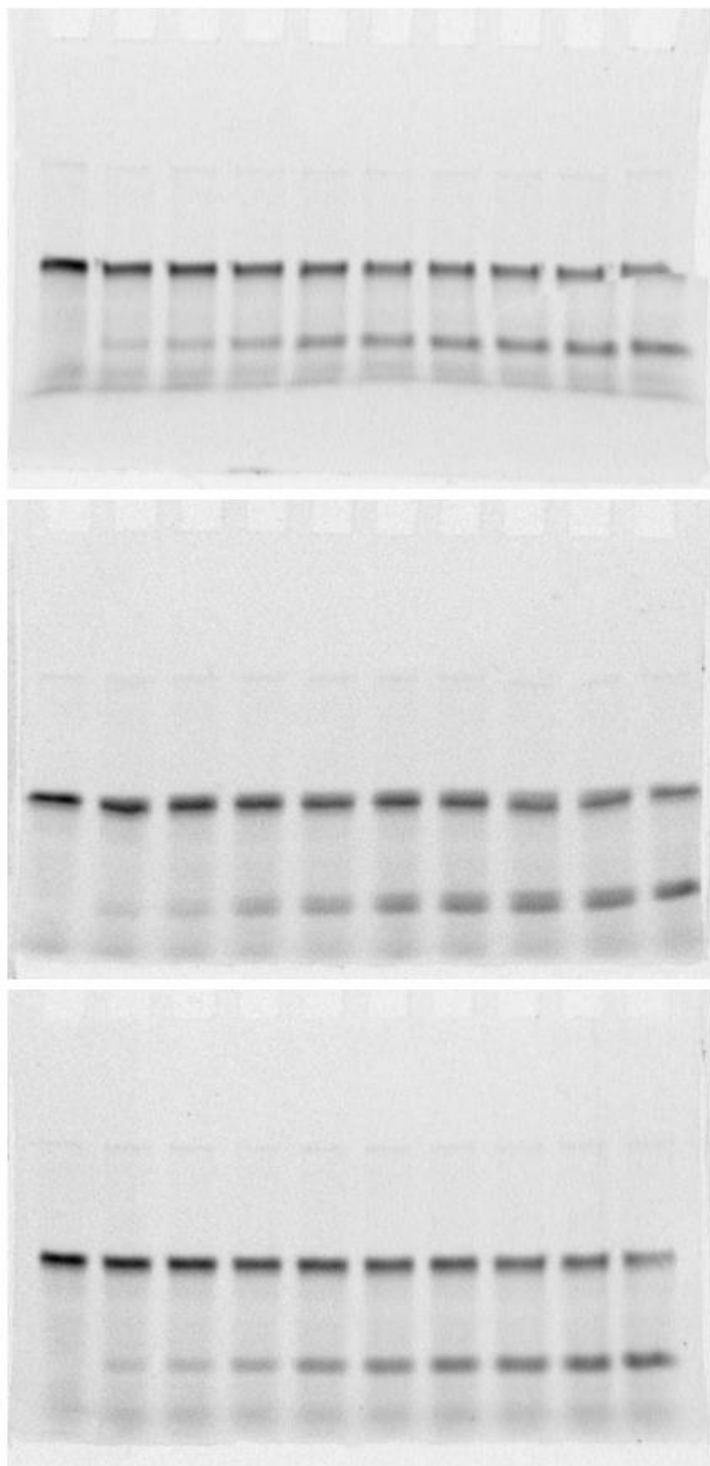

Figure S10. Unedited gel scans of hSMUG1 time course with substrate 5hmU:A in Fig. 3D.

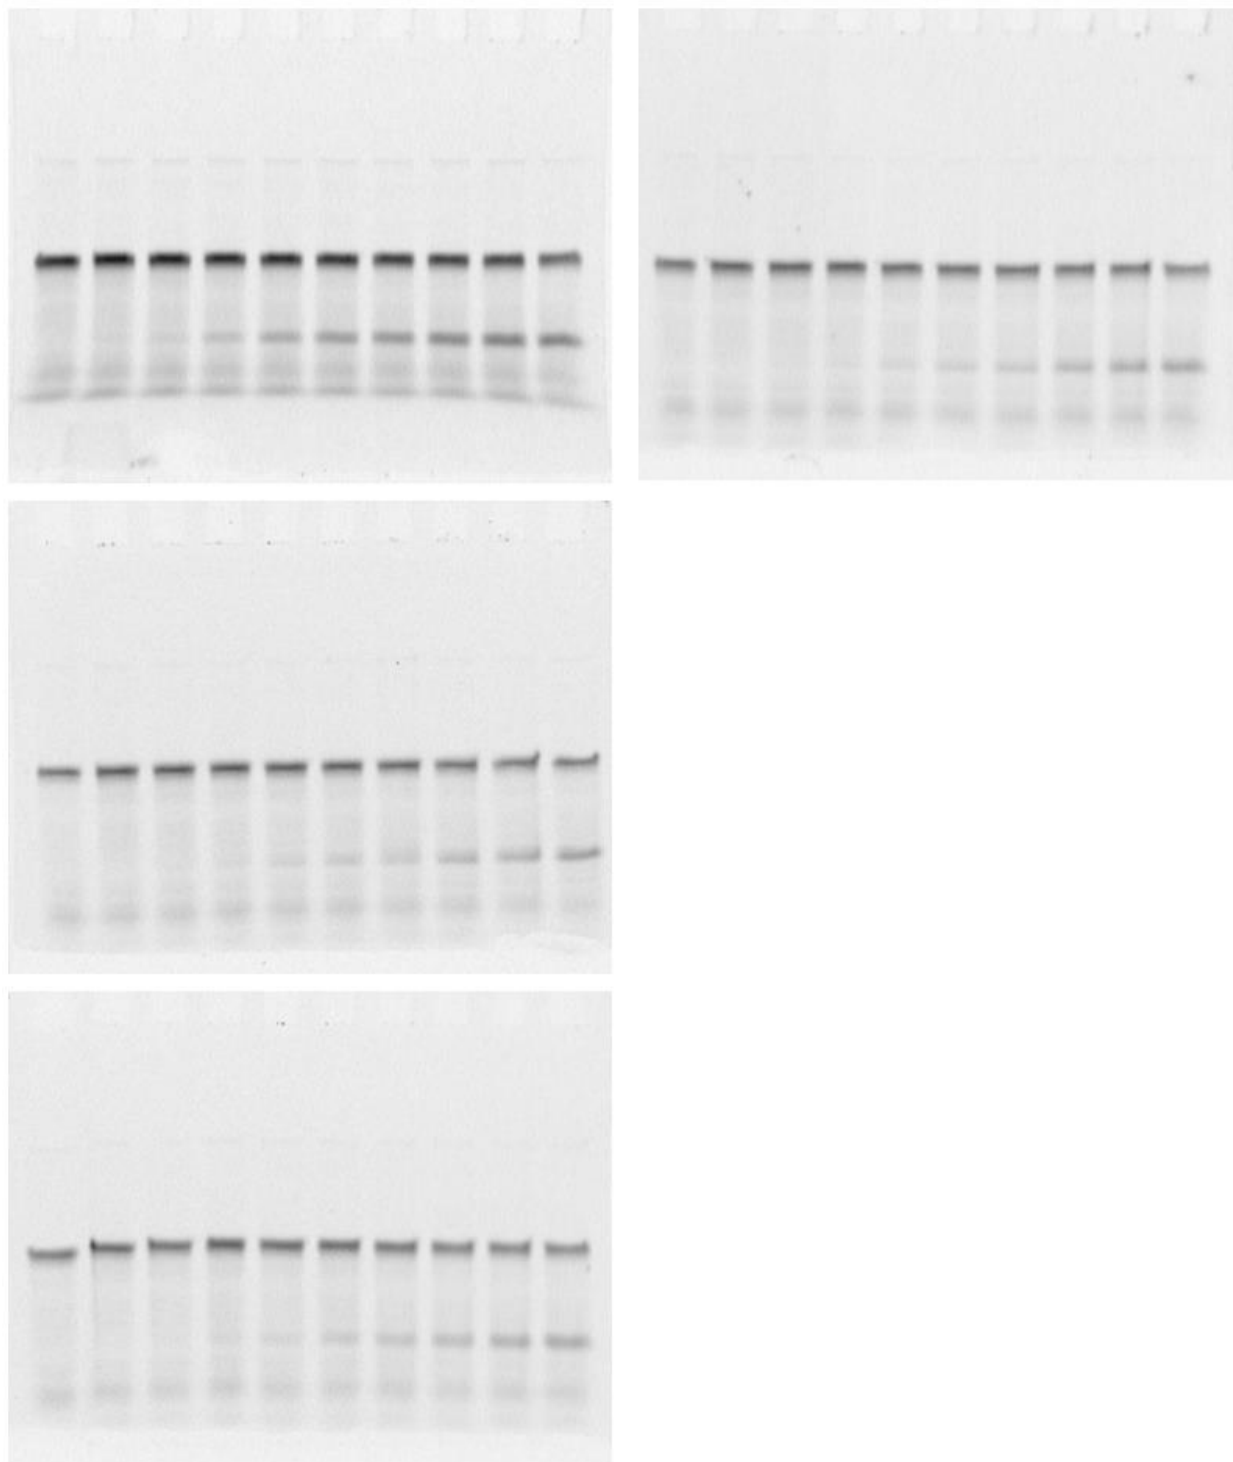

Figure S11. Unedited gel scans of hSMUG1 time course with substrate Tel22-5hmU in Fig. 3D.

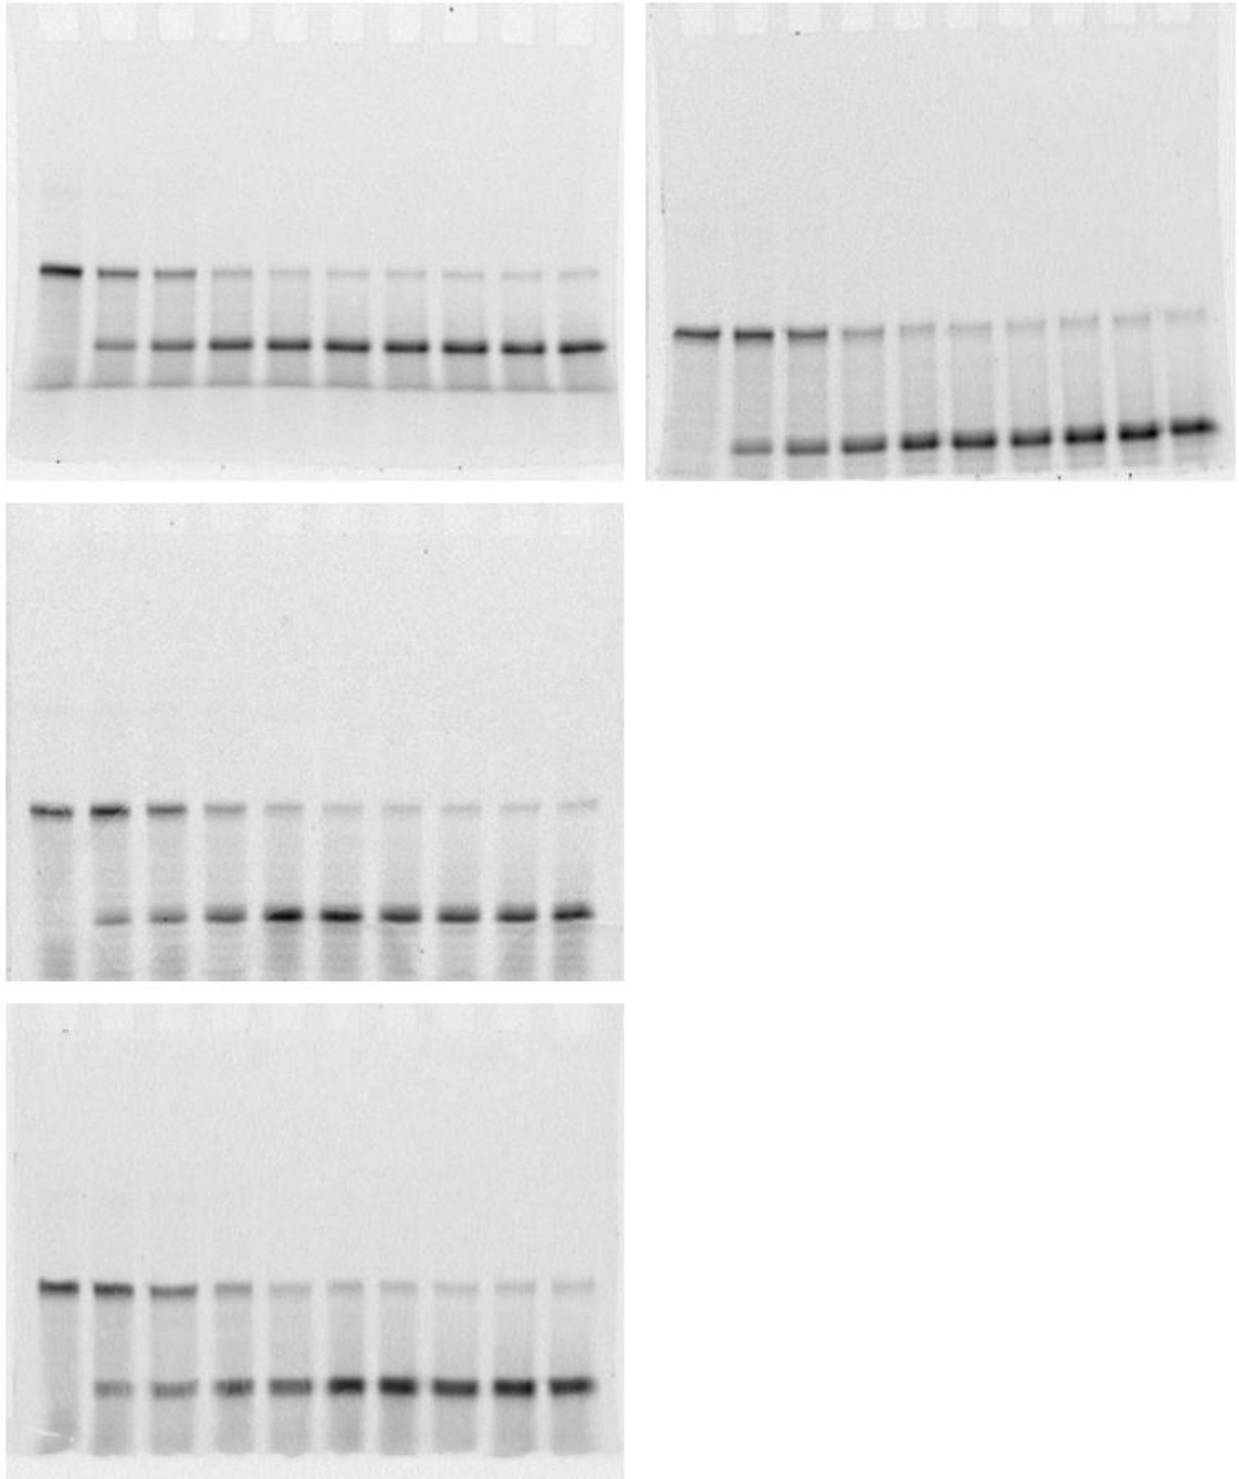

Figure S12. Unedited gel scans of hSMUG1 time course with substrate NQ-5hmU in Fig. 3D.

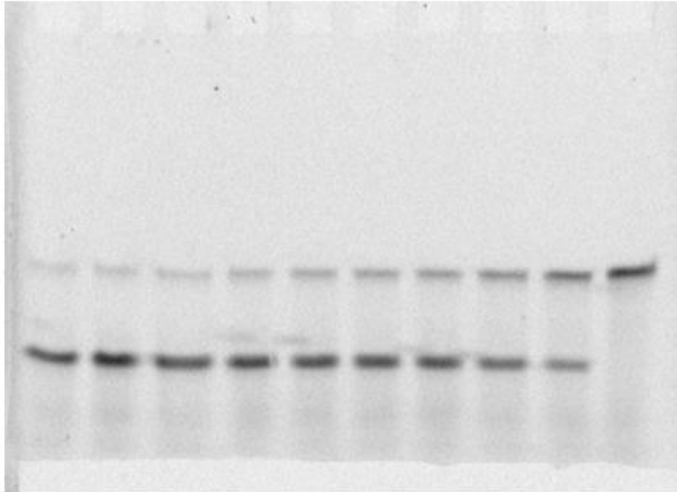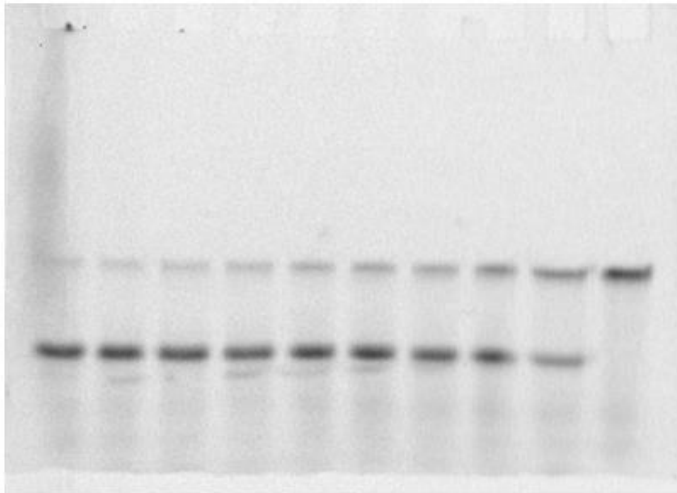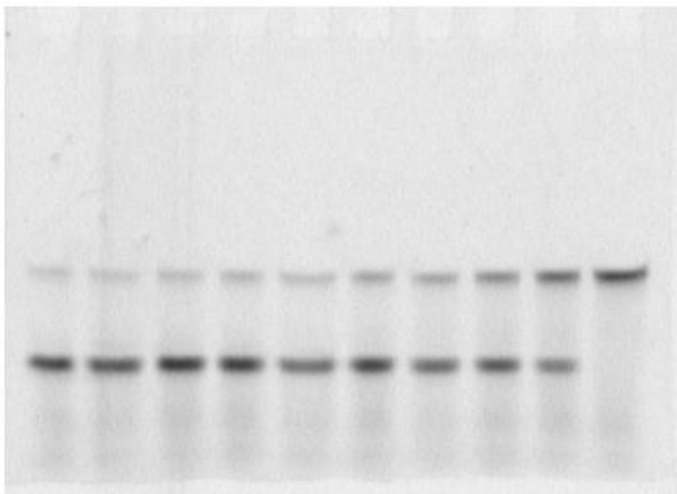

Figure S13. Unedited gel scans of APE1 time course with substrate THF:A in Fig. 3E.



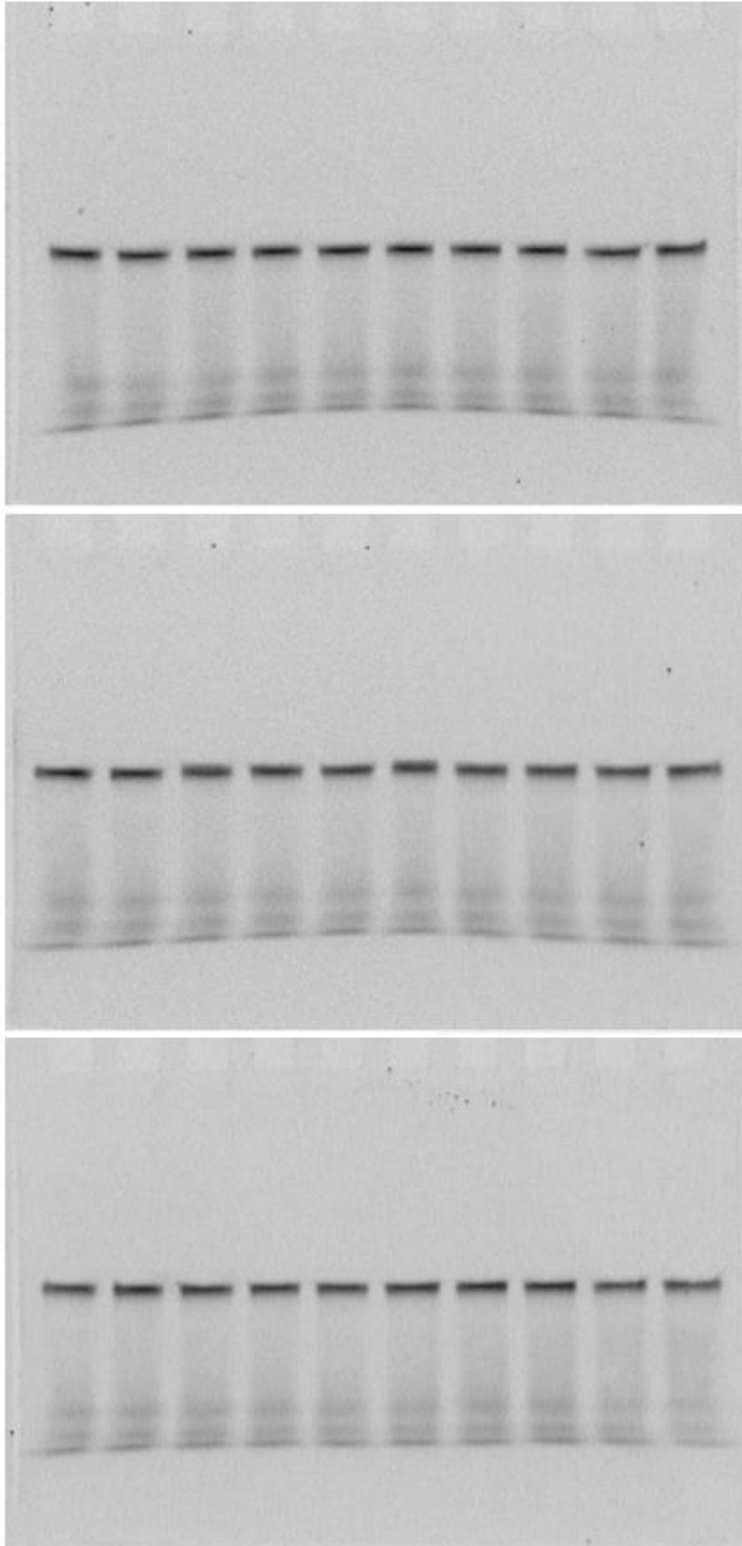

Figure S14. Unedited gel scans of APE1 time course with substrate Tel22-THF in Fig. 3E.

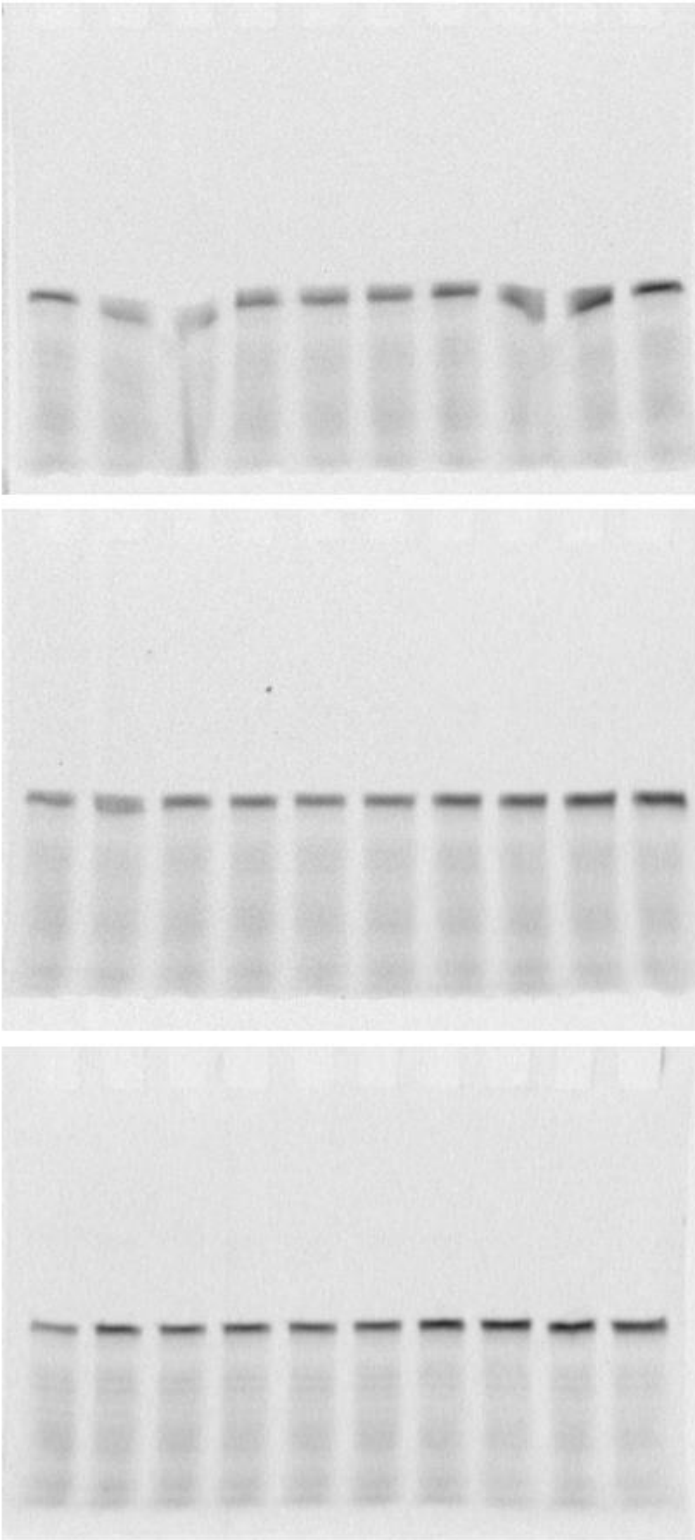

**Figure S15. Unedited gel scans of APE1 time course with substrate NQ-THF in Fig. 3E.**

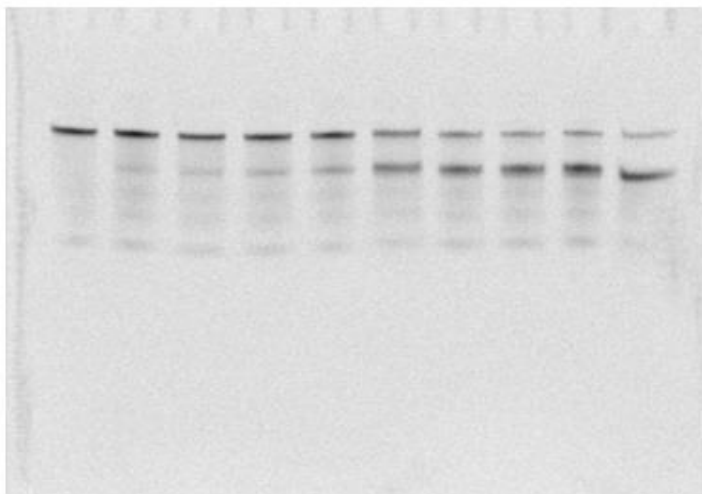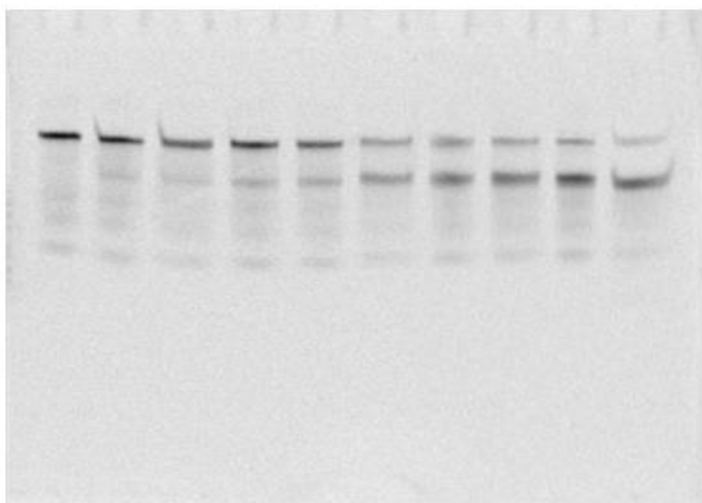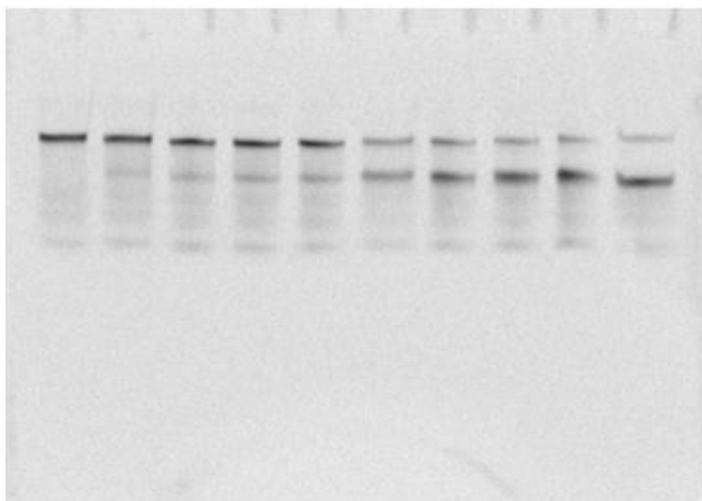

Figure S16. Unedited gel scans of the  $\beta$ -elimination time course with UDG treated substrate Tel22-U in Fig. 3F.

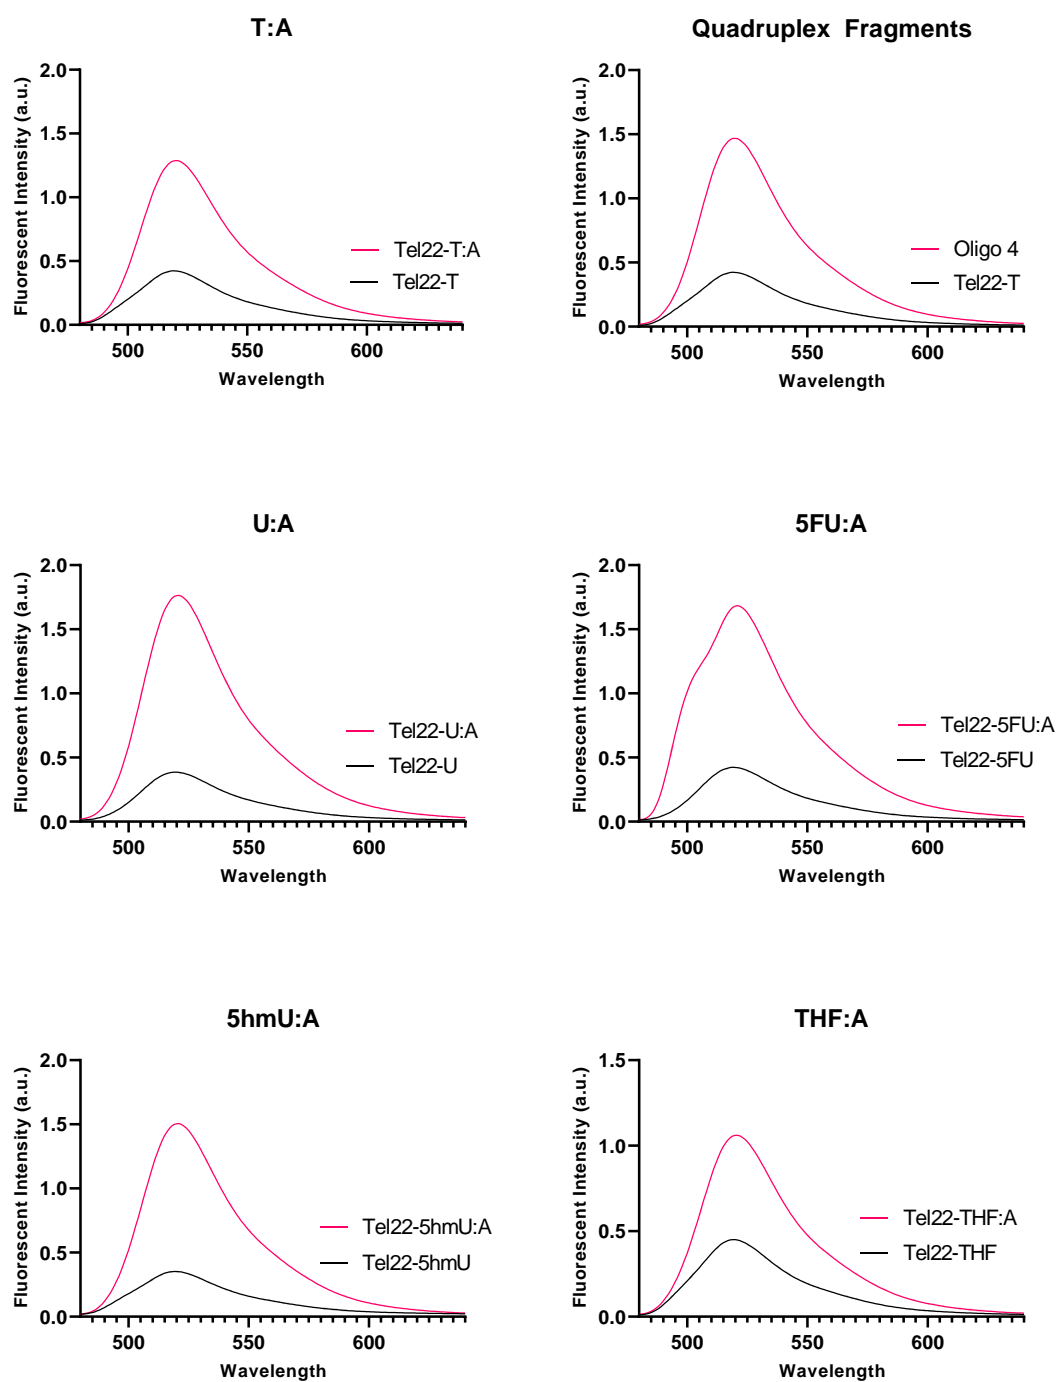

**Figure S17. Quadruplexes quench fluorescence compared to duplex.** In addition, when the quadruplex oligonucleotide is separated in half (quadruplex fragment), simulating a DNA repair gap, fluorescence is no longer quenched and a similar fluorescence intensity to duplex is observed.

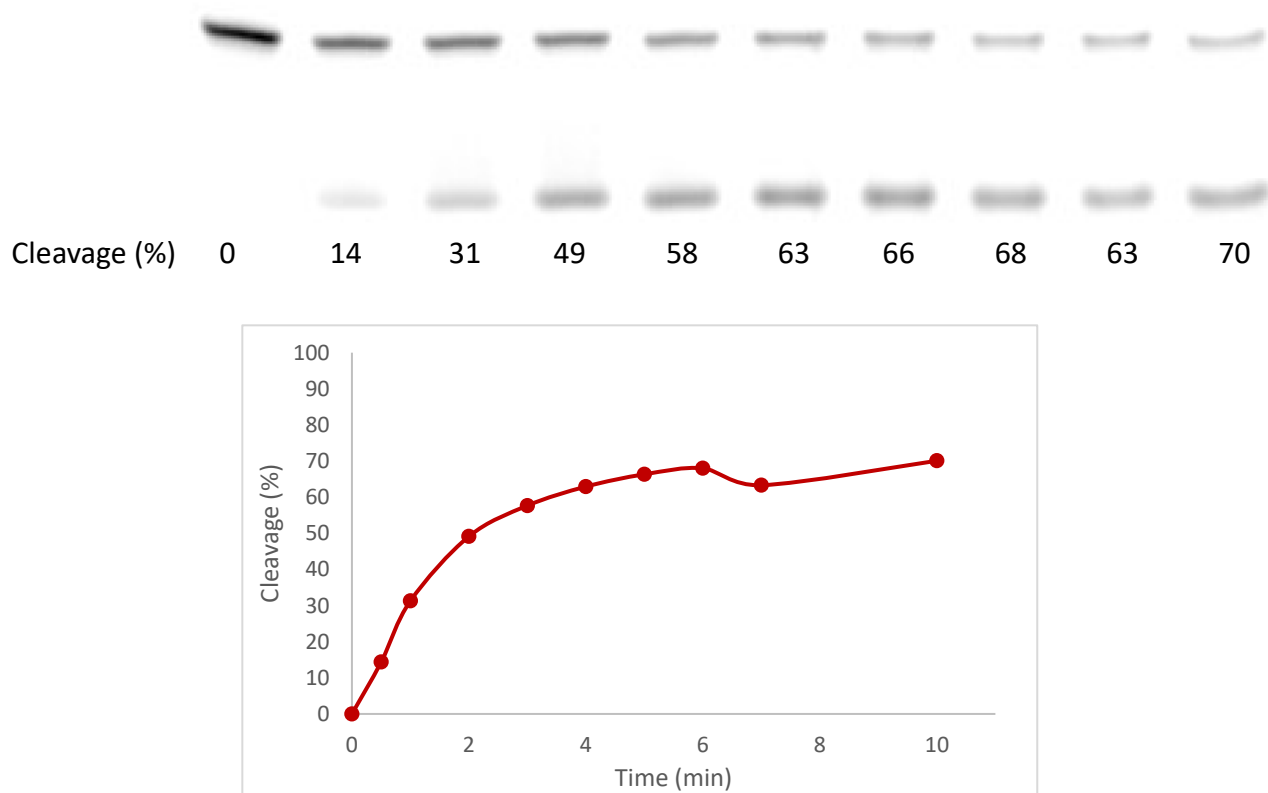

**Figure S18. Rate of gap formation in Figure 6 time course.** The Tel22-T oligo paired with Oligo 9 (U-Cy5) was purified using an NEB kit and then annealed to a non-fluorescent oligo to make a A:U-Cy5 duplex oligo. 20% excess of the U-Cy5 oligo was used. A 25  $\mu$ l reaction was prepared in buffer (20 mM Tris, 150 mM KCl, 15 mM NaCl, 10 mM Mg-AC, pH 7.4) and 25 pmol of oligo duplex (1  $\mu$ M). UDG and APE1 were combined and then an aliquot containing 1.25 U UDG (0.42 pmol, 17 nM) and 2.5 U APE 1 (0.09 pmol, 3.6 nM) was added to the reaction, mixed, and placed into a 37  $^{\circ}$ C thermocycler. At each time point, the reaction was mixed 2-3X with a pipette and then 2.5  $\mu$ l (2.5 pmol oligo) was taken and quenched with 12.5  $\mu$ l of cold formamide and placed on ice. Samples were heated to 95  $^{\circ}$ C for 1 min and then run on a 6 M urea 20% PAGE gel.
